# Supplementary figures and images for: RAPSYN-mediated neddylation of BCR-ABL alternatively determines the fate of Philadelphia chromosome-positive leukemia
Source: eLife journal article supplement (doi:10.7554/elife.88375), 2023-07-28

A

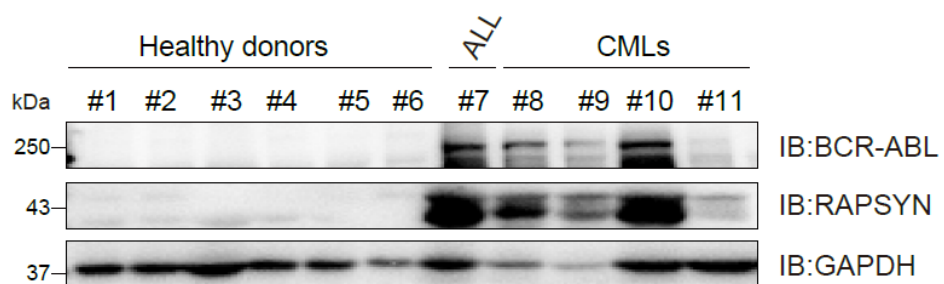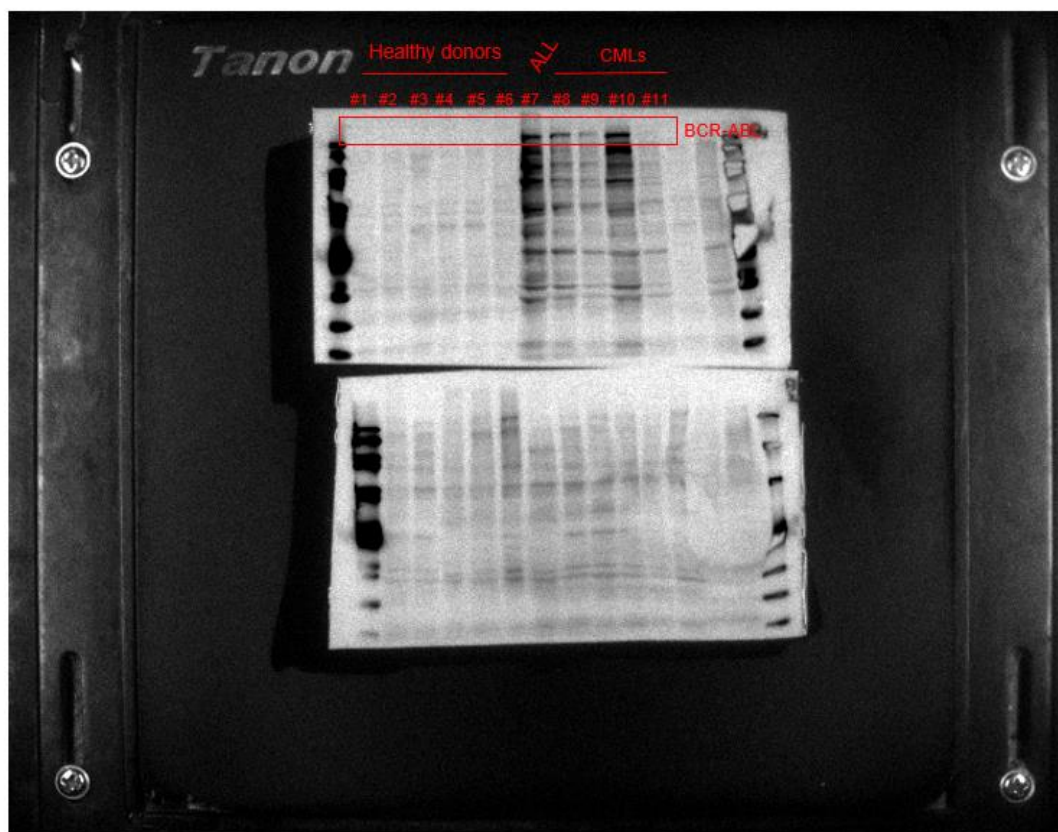

Tanon

Healthy donors

ALL

CMLs

#1 #2 #3 #4 #5 #6 #7 #8 #9 #10 #11

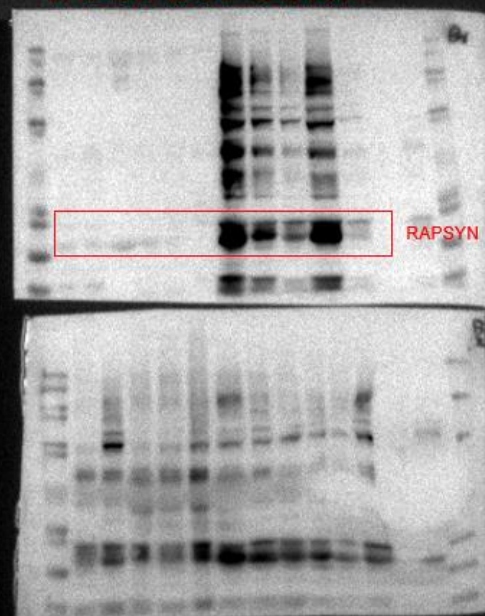

RAPSIN

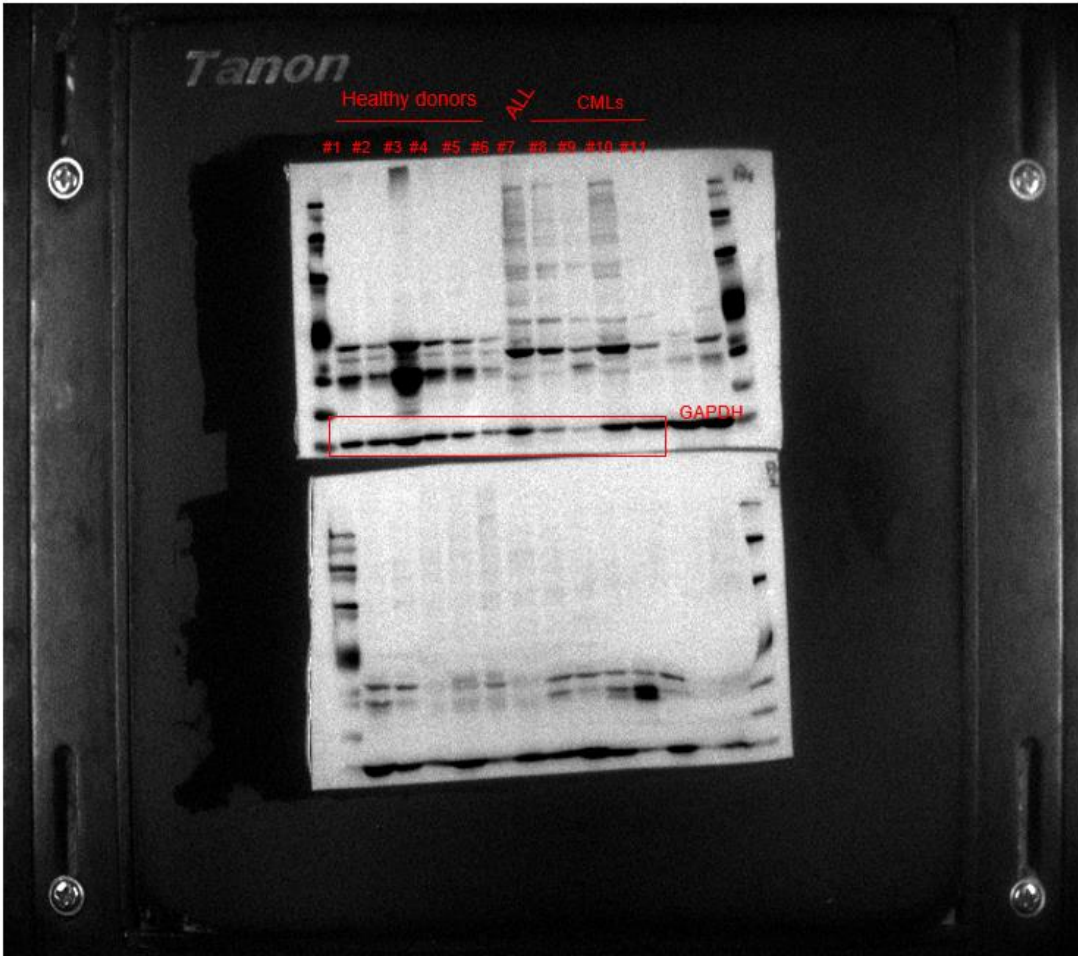

Supplement: fig1-data2 [file elife-88375-fig1-data2-v1.zip]

B

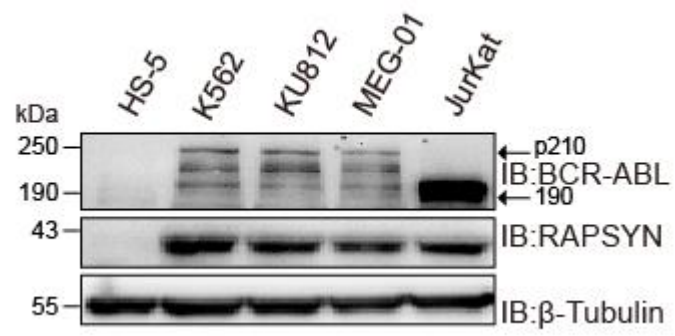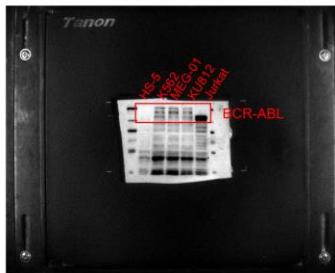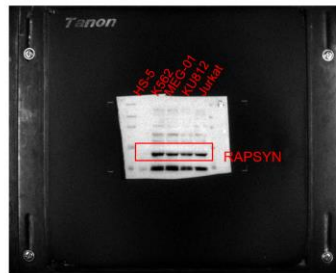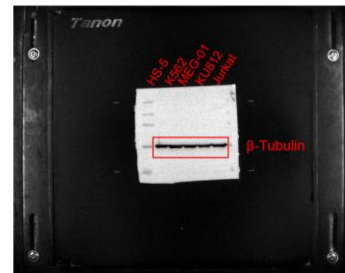

Supplement: fig1-data4 [file elife-88375-fig1-data4-v1.zip]

I

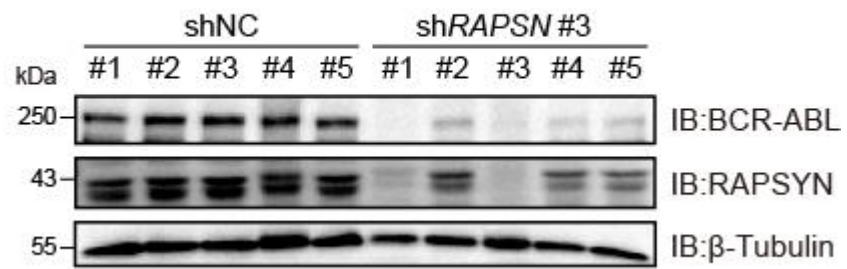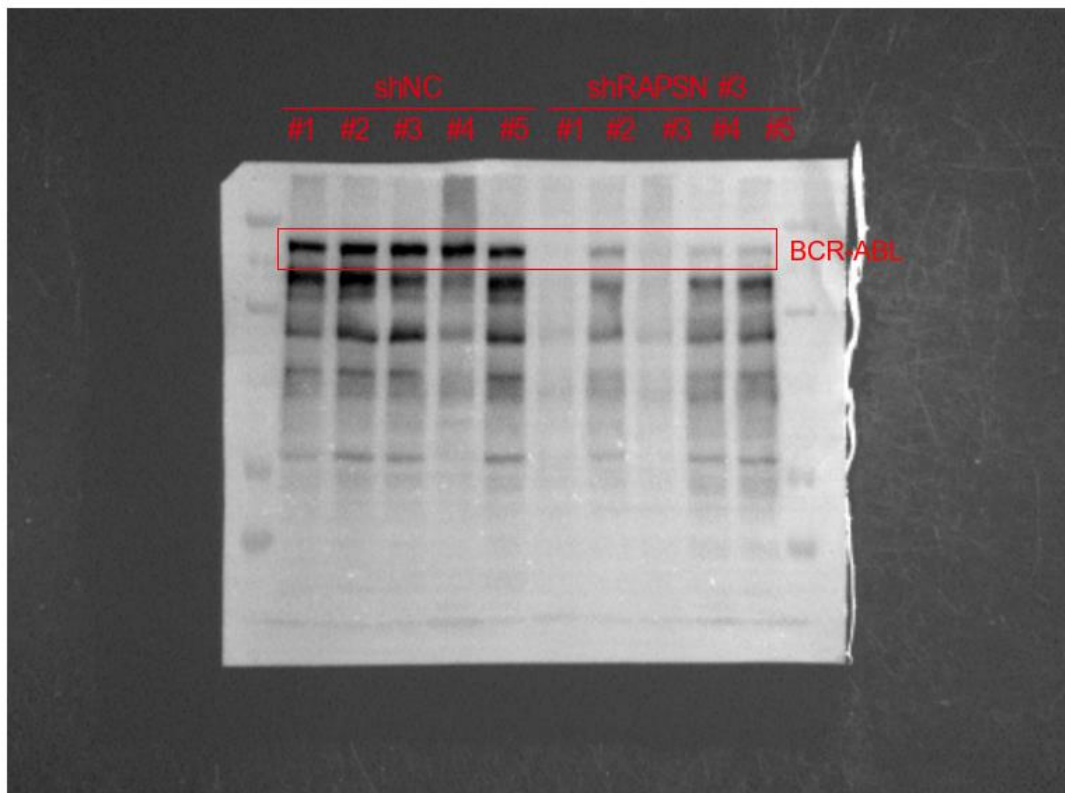

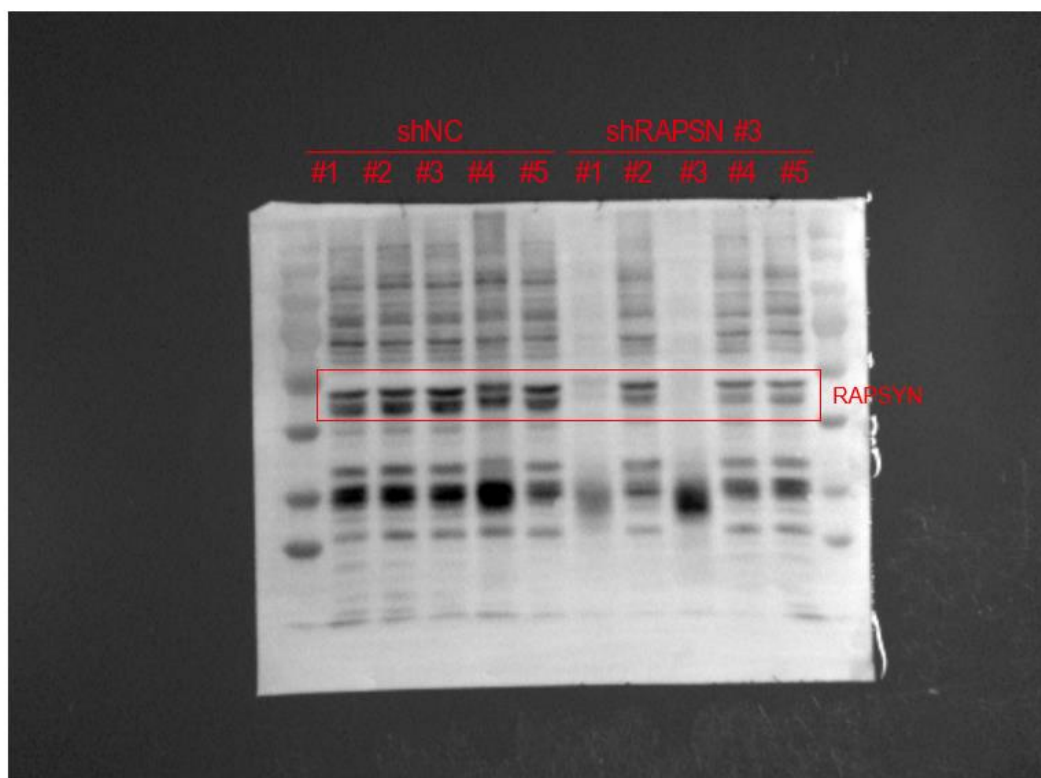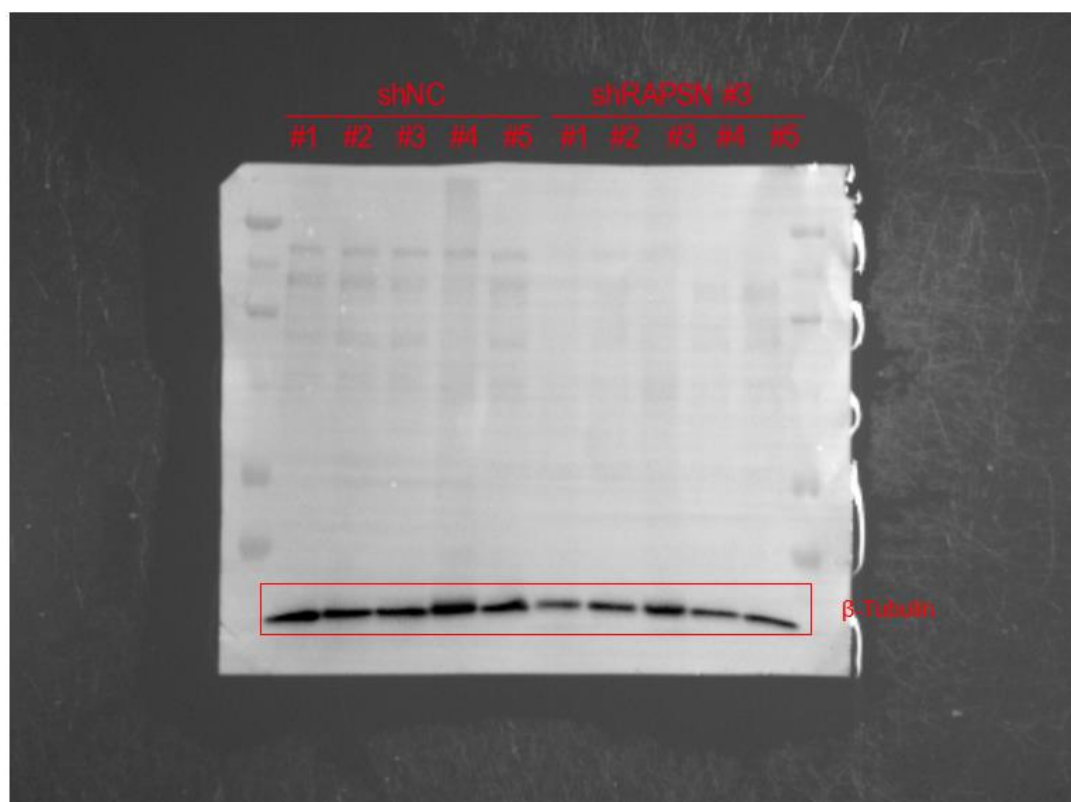

Supplement: fig1-data6 [file elife-88375-fig1-data6-v1.zip]

J

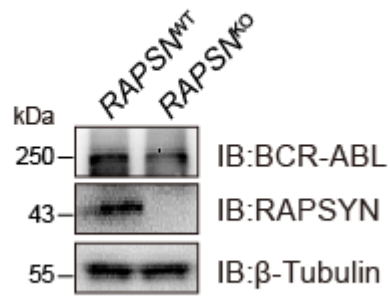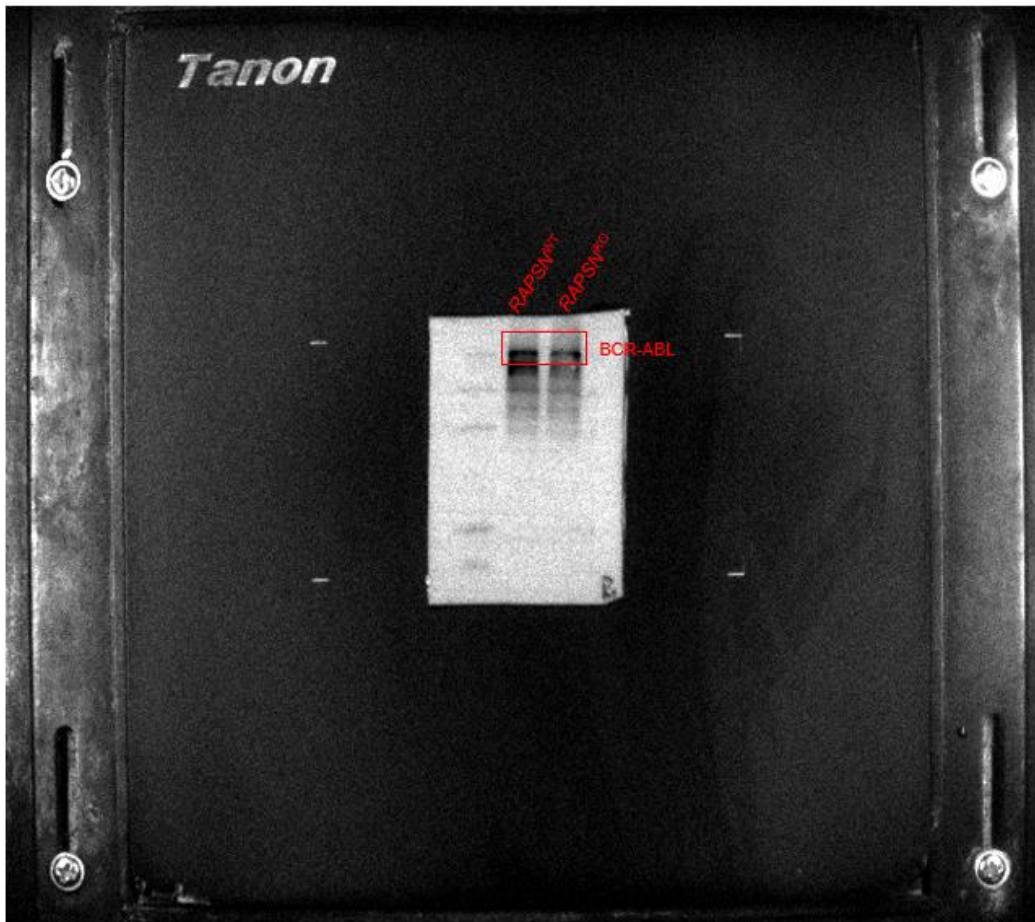

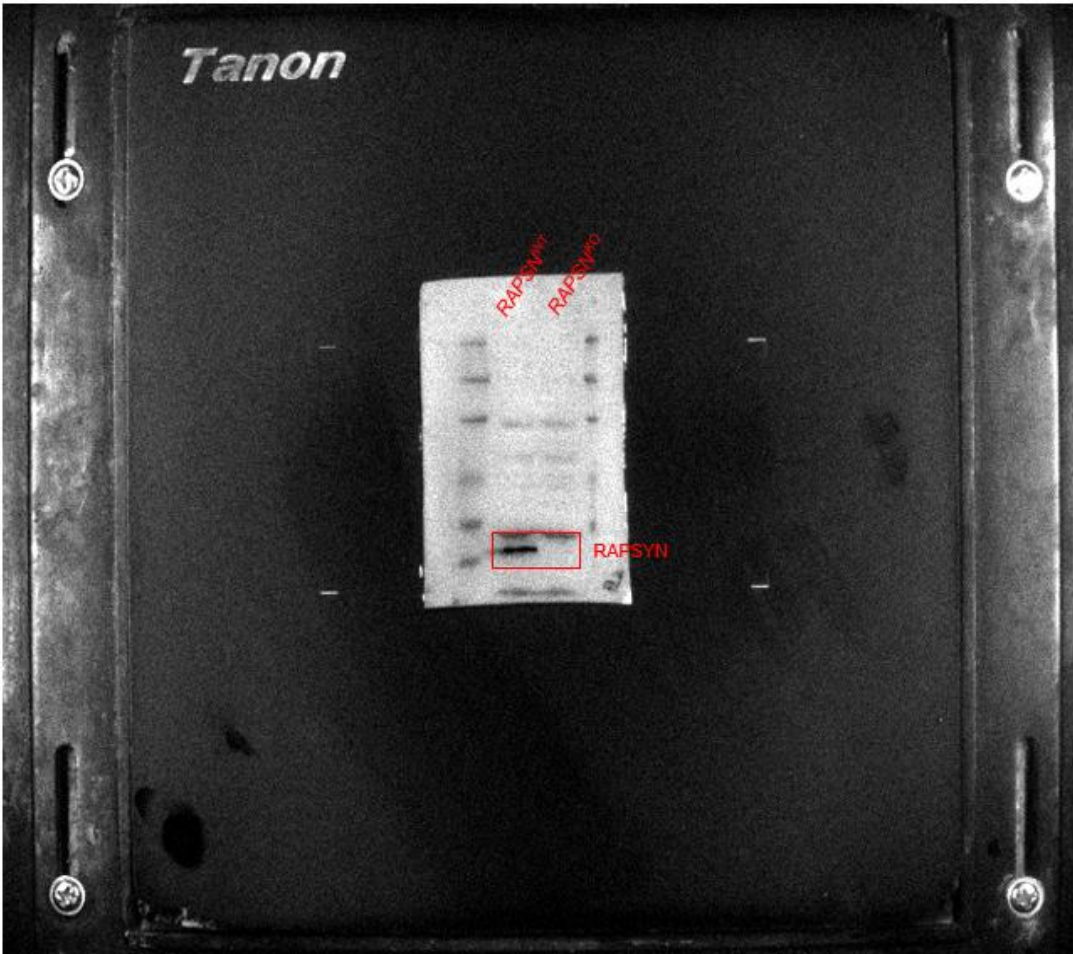

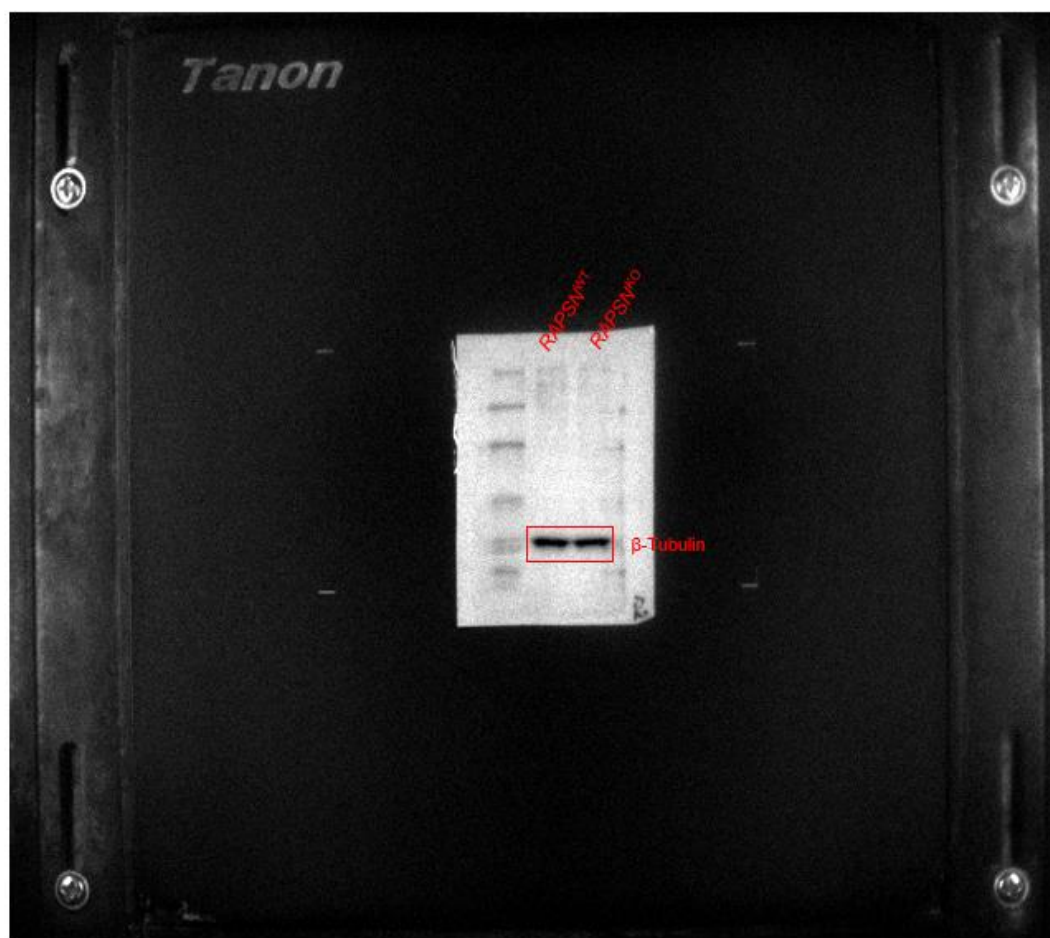

Supplement: fig1-data8 [file elife-88375-fig1-data8-v1.zip]

E

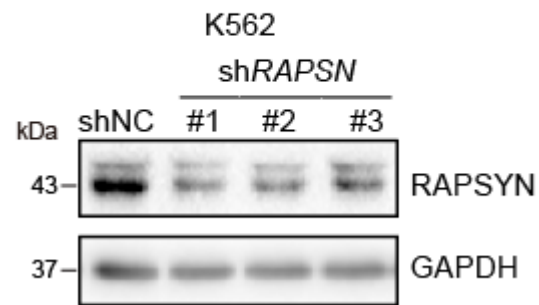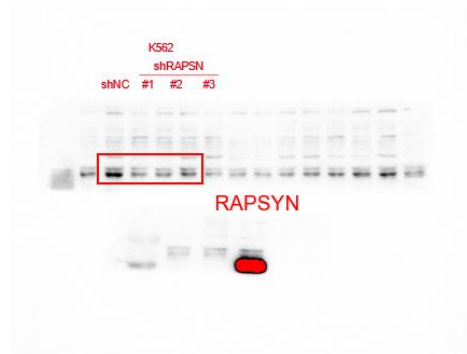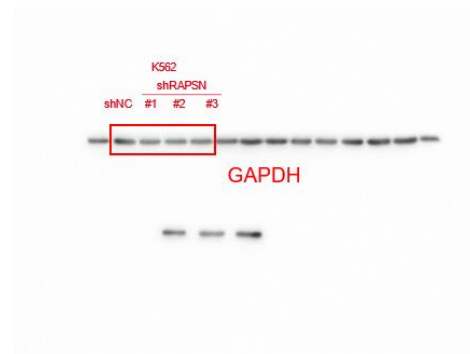

Supplement: fig1-figsupp1-data2 [file elife-88375-fig1-figsupp1-data2-v1.zip]

**E**

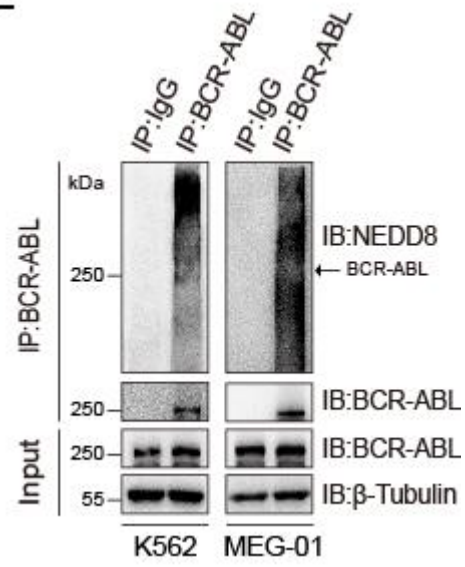

K562

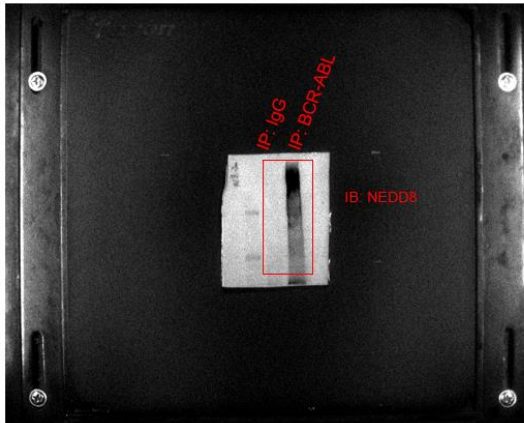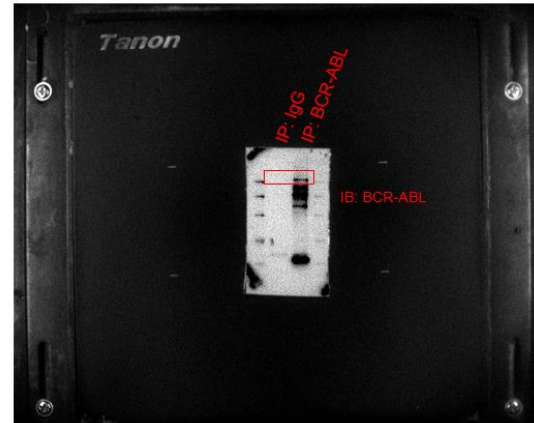

Input

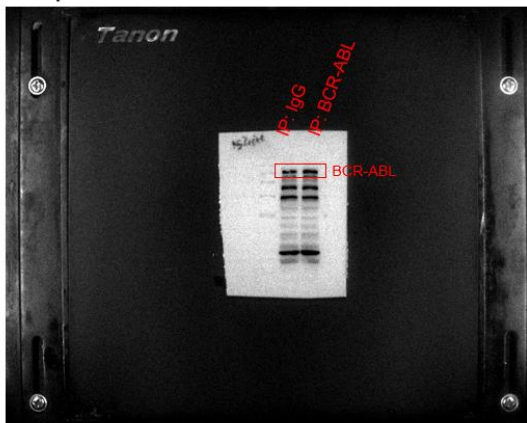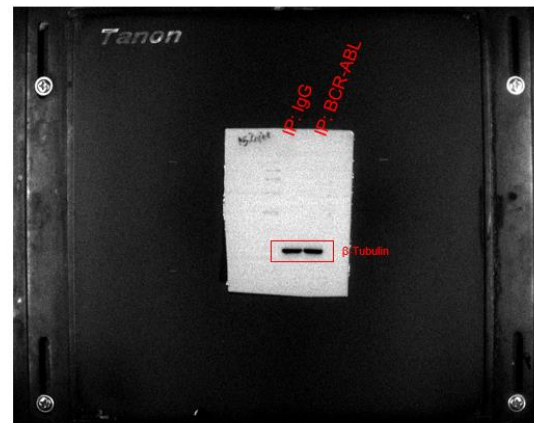

MEG-01

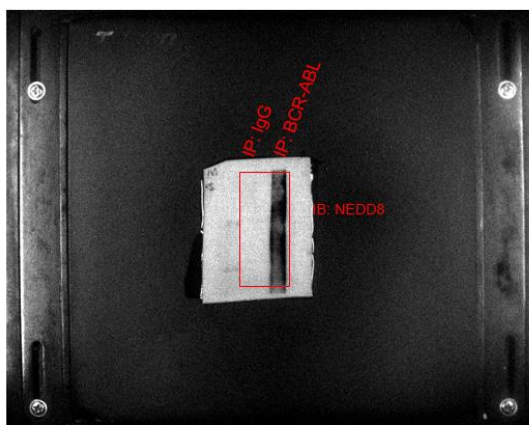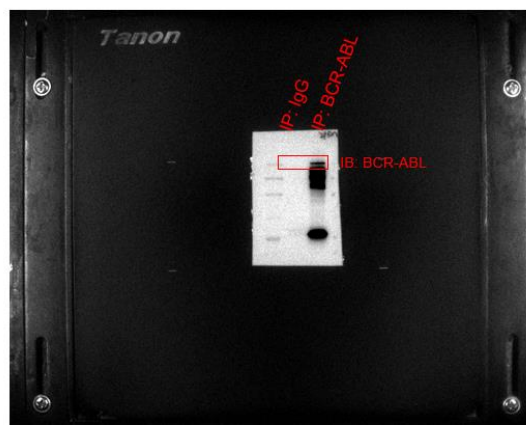

Input

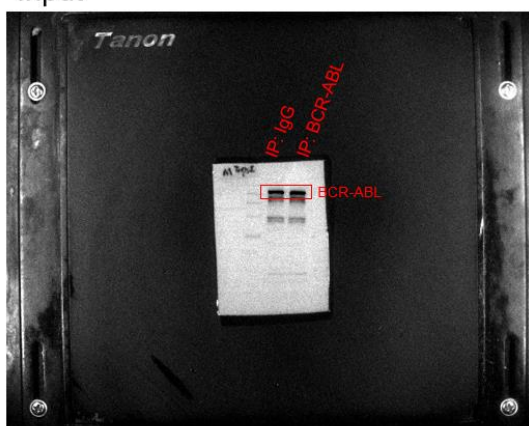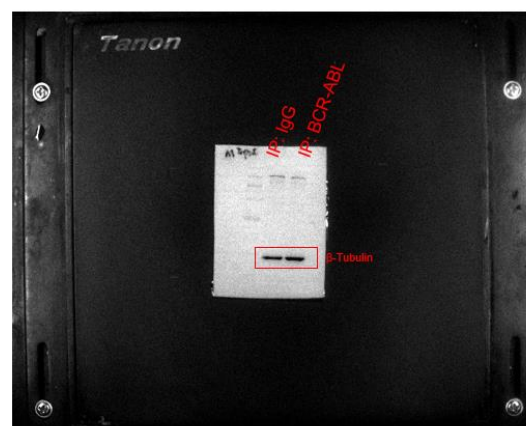

Supplement: fig2-data10 [file elife-88375-fig2-data10-v1.zip]

F

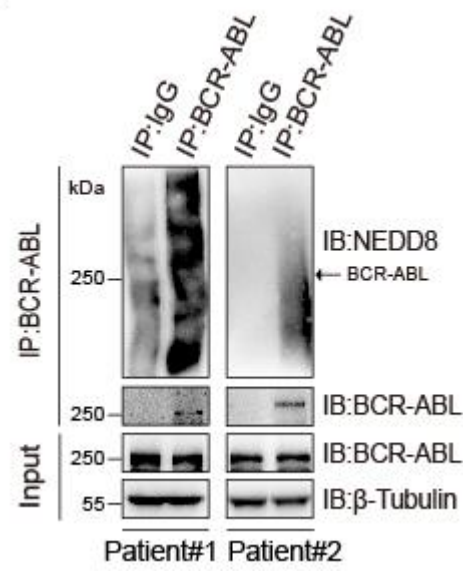

Patient #1

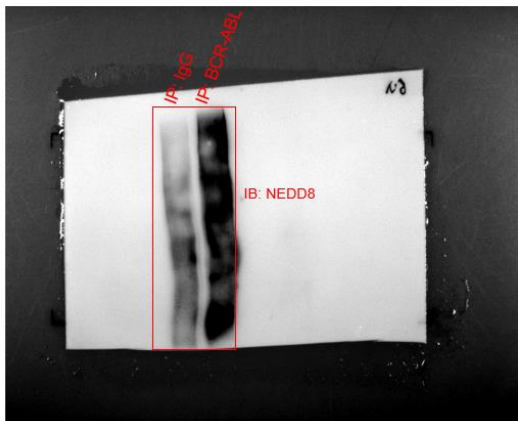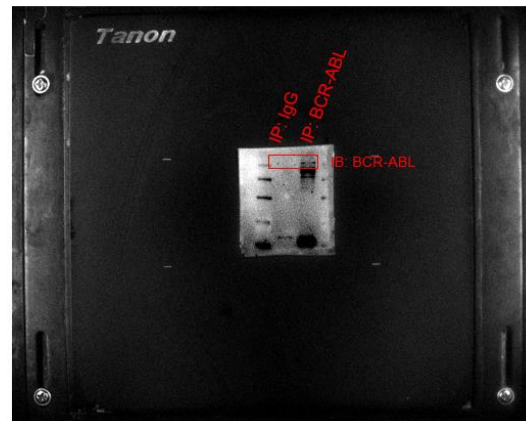

Input

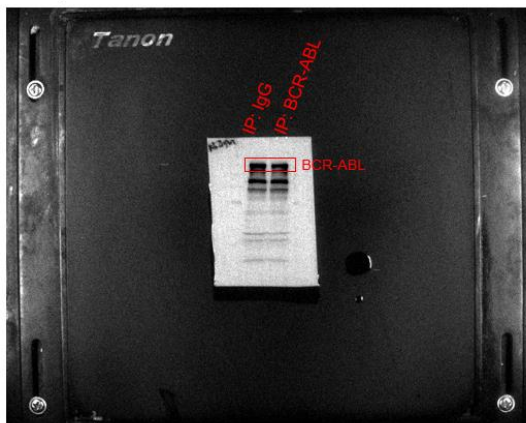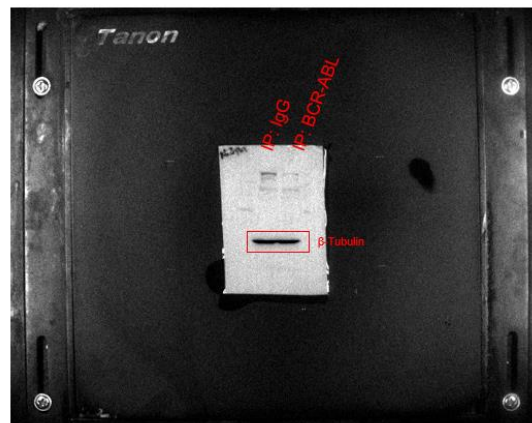

Patient #2

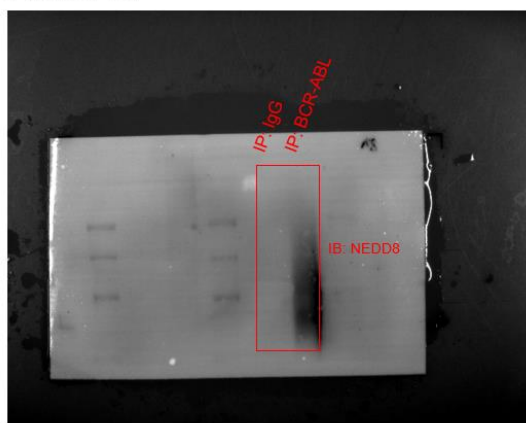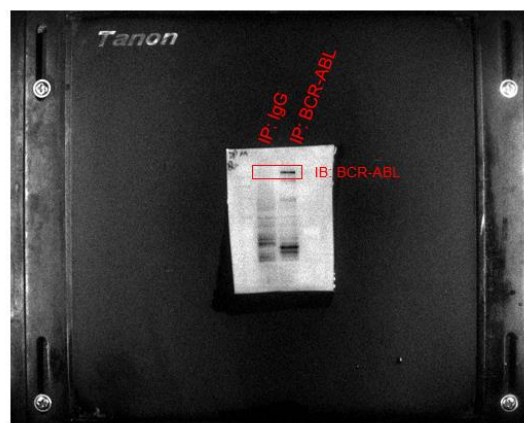

Input

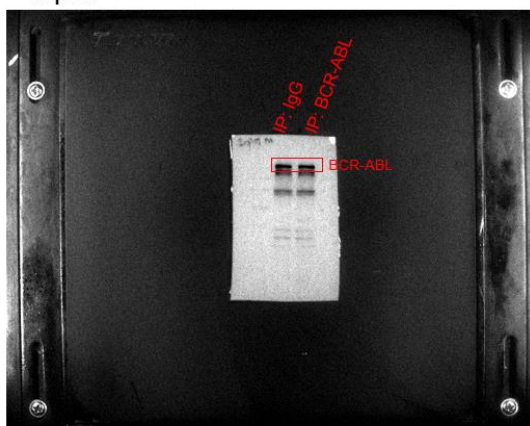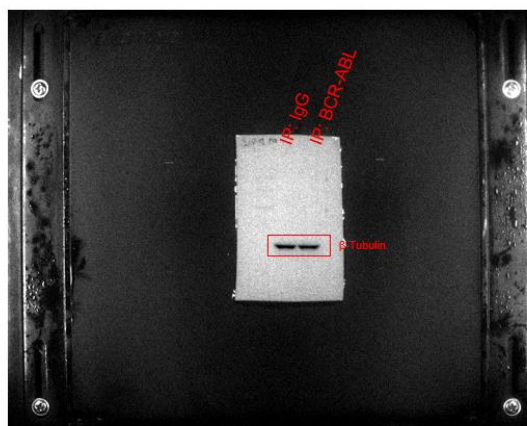

Supplement: fig2-data12 [file elife-88375-fig2-data12-v1.zip]

G

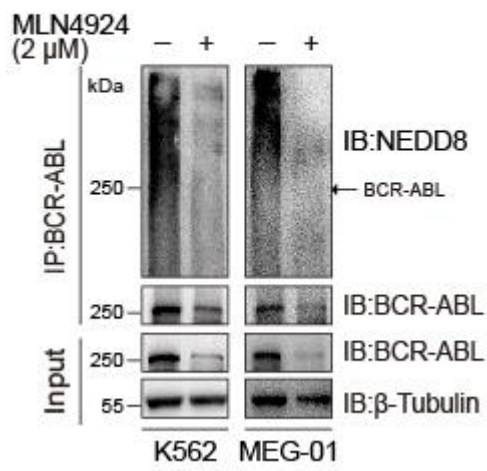

K562

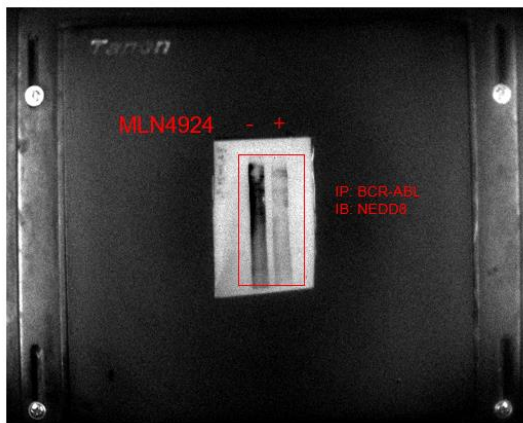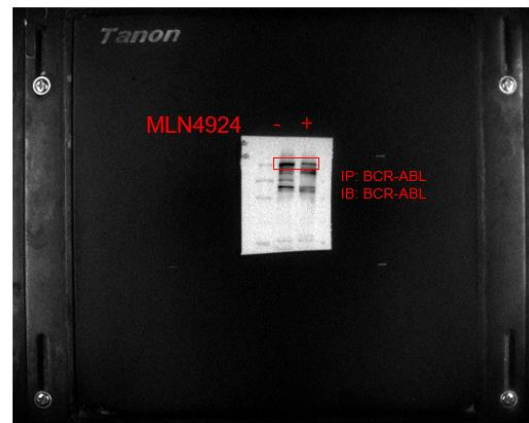

Input

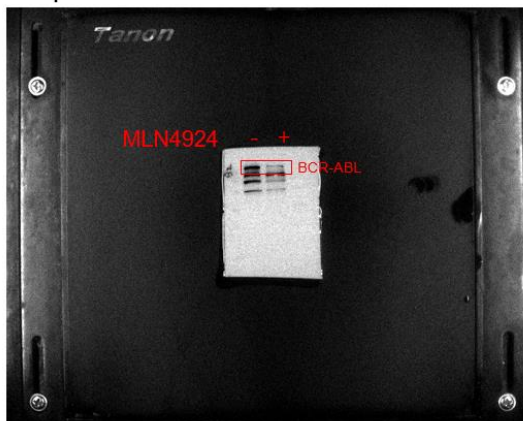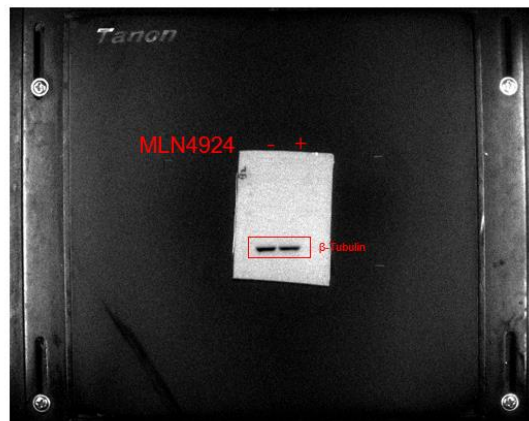

MEG-01

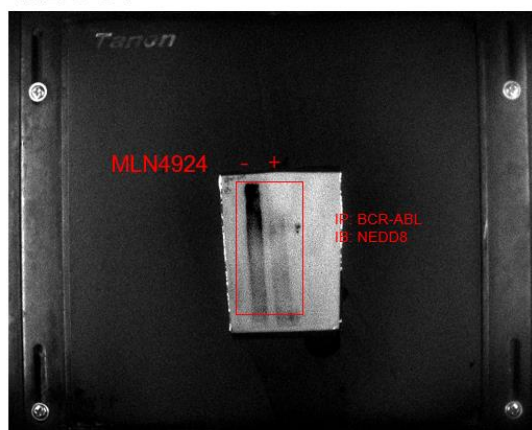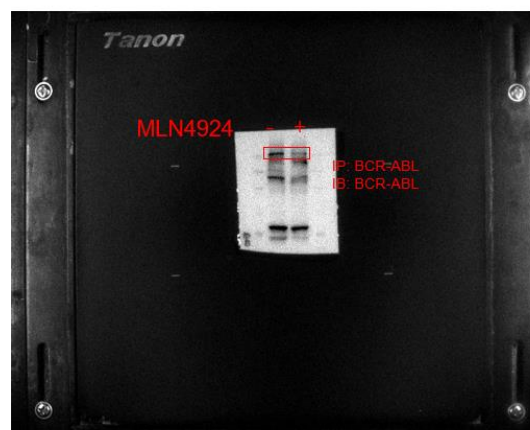

Input

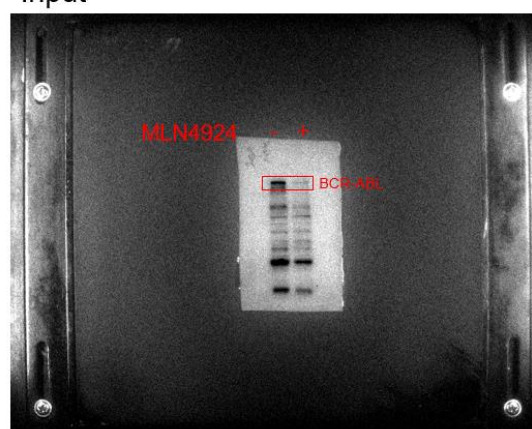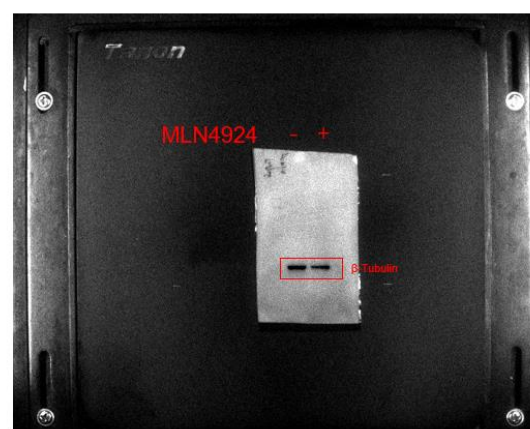

Supplement: fig2-data14 [file elife-88375-fig2-data14-v1.zip]

H

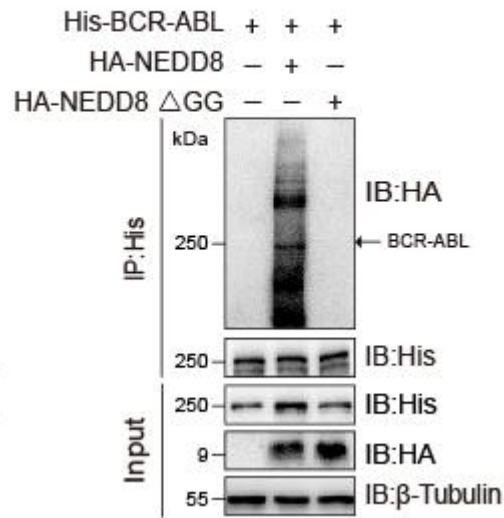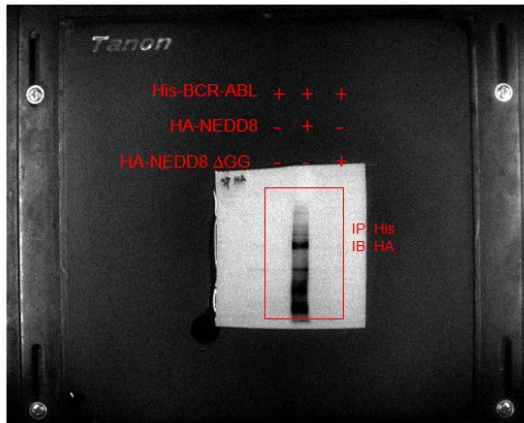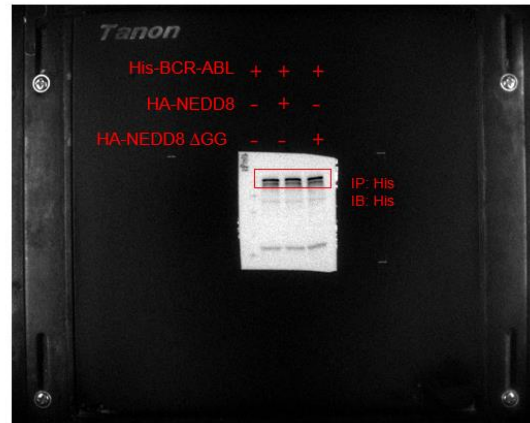

Input

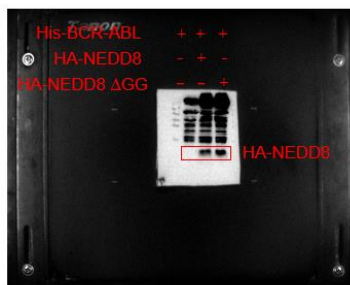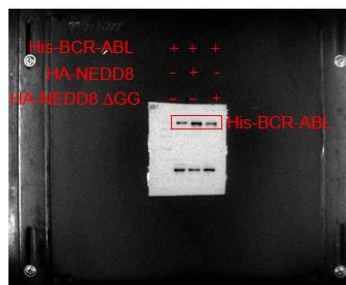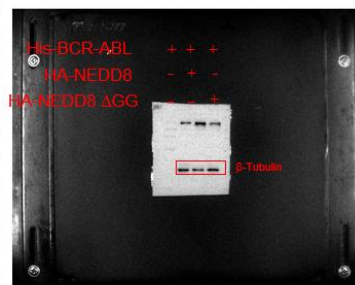

Supplement: fig2-data16 [file elife-88375-fig2-data16-v1.zip]

His-BCR-ABL + +  
 Flag-NEDP1 - +  
 HA-NEDD8 + +

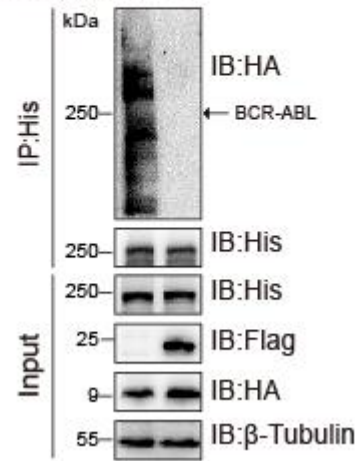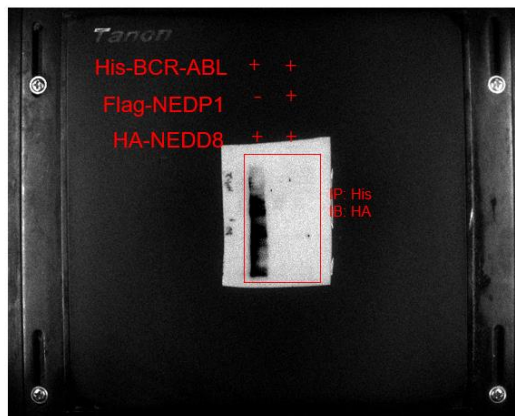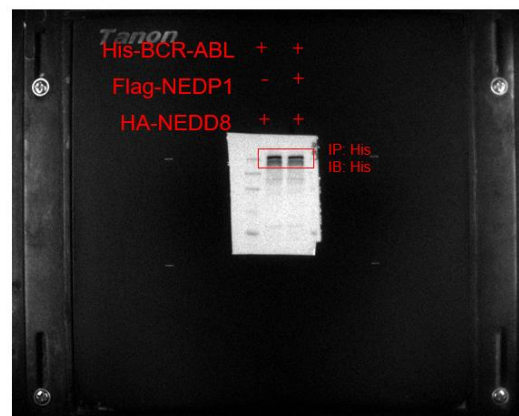

Input

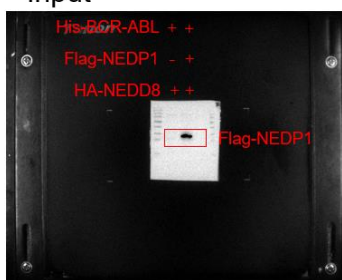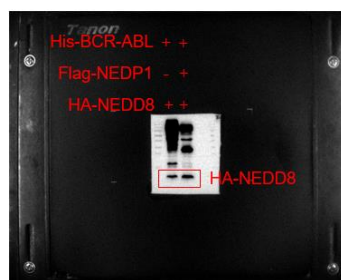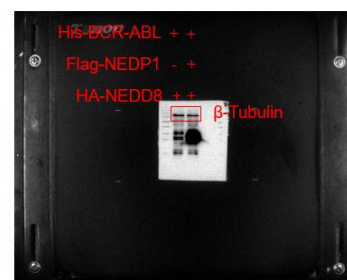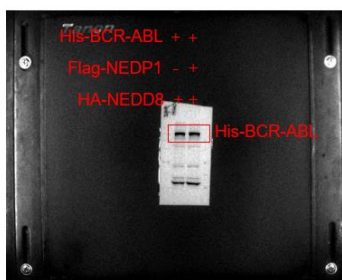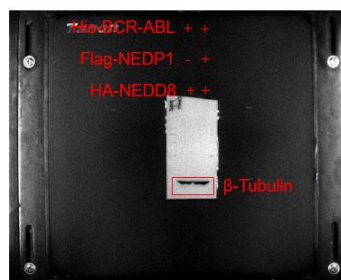

Supplement: fig2-data18 [file elife-88375-fig2-data18-v1.zip]

A

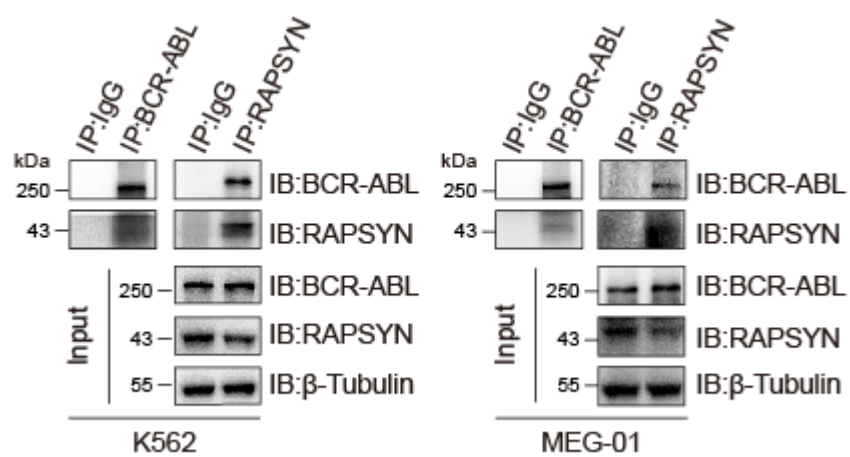

K562

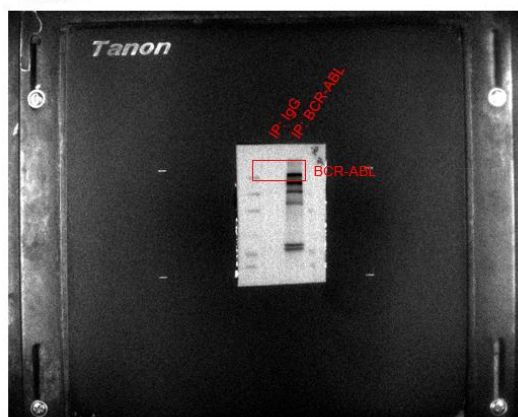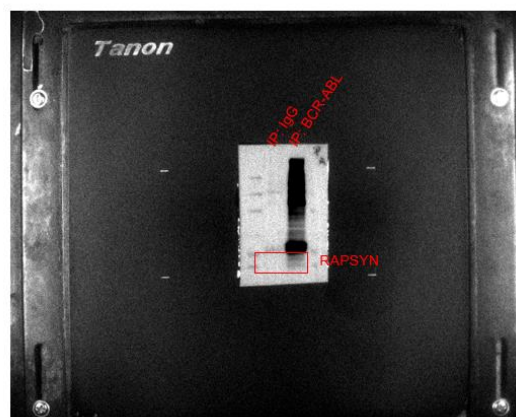

K562

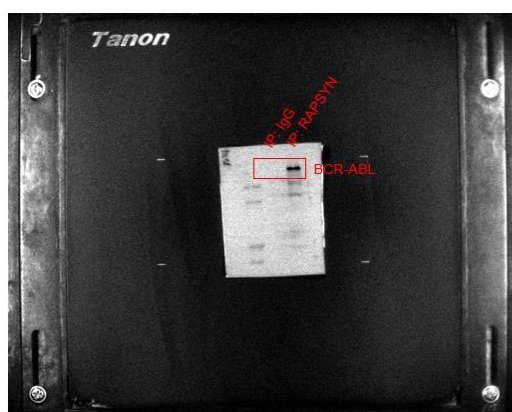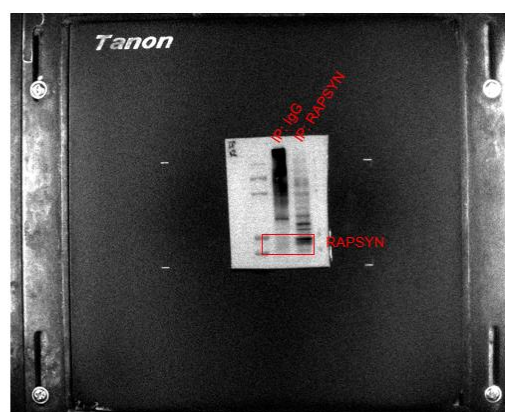

## K562 Input

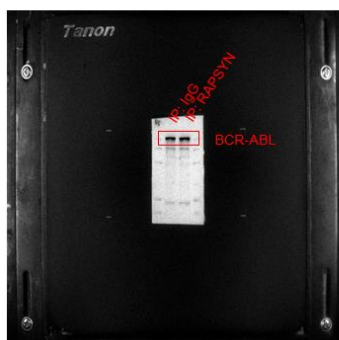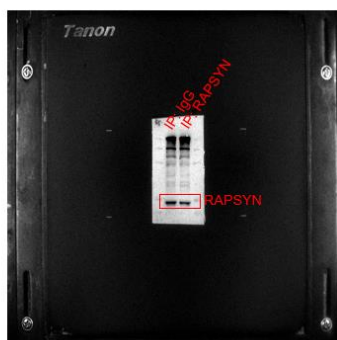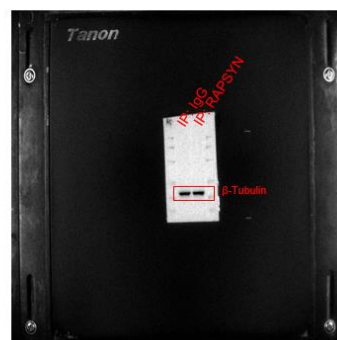

## MEG-01

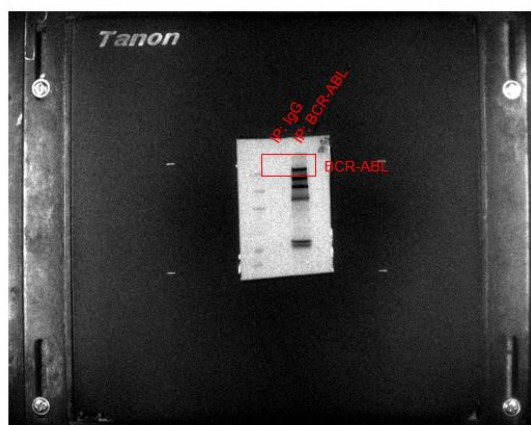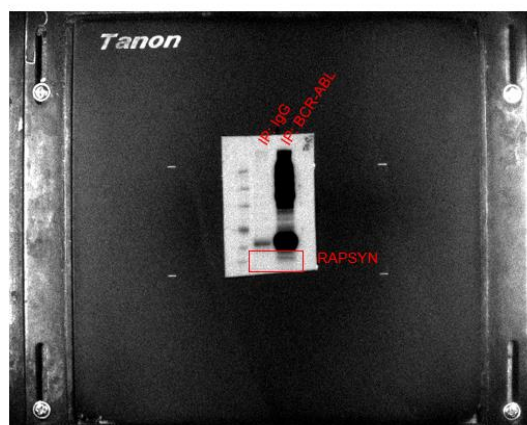

## MEG-01

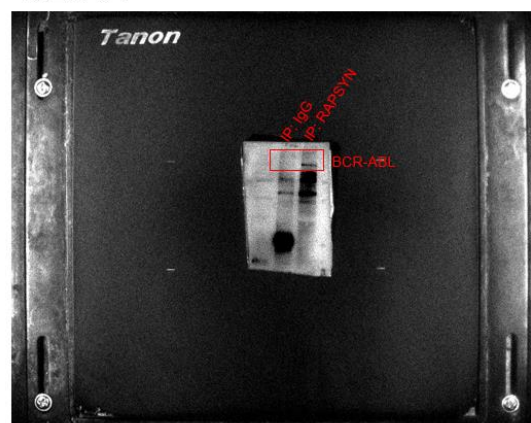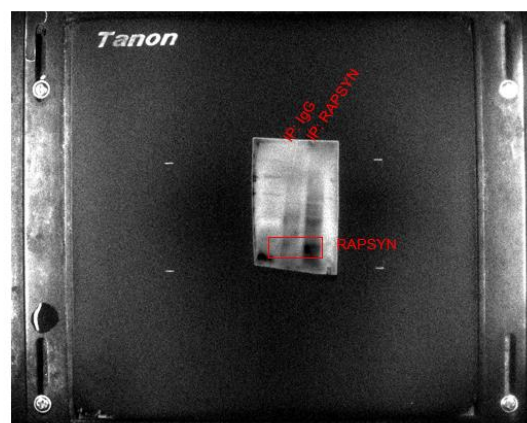

## MEG-01 Input

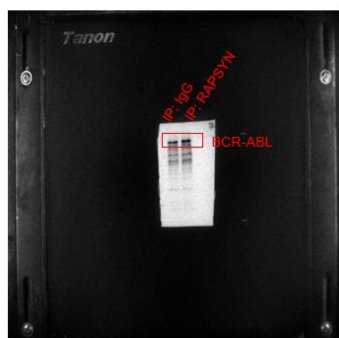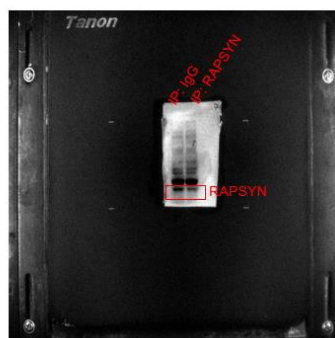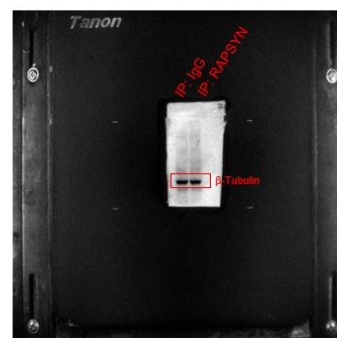

Supplement: fig2-data2 [file elife-88375-fig2-data2-v1.zip]

J

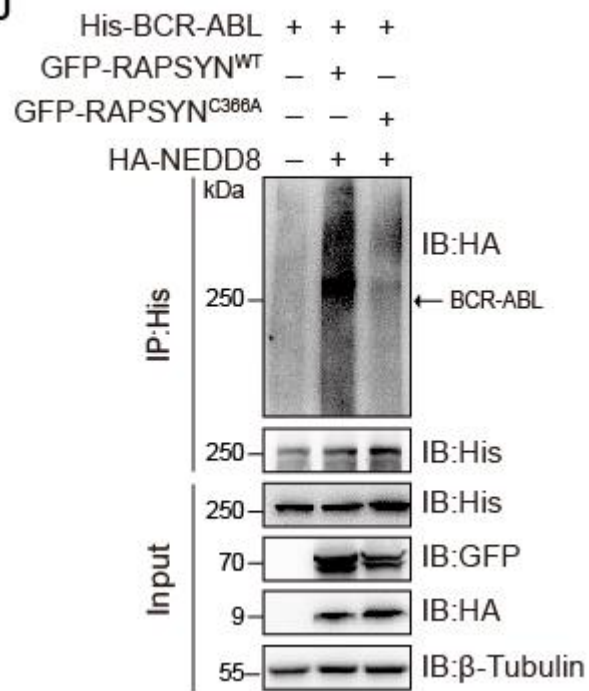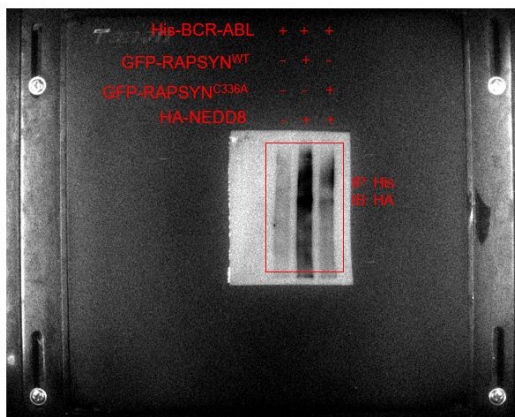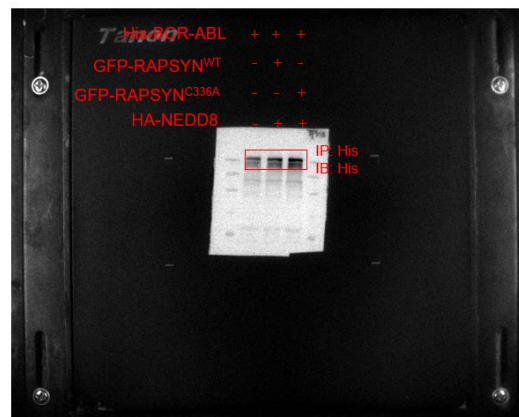

Input

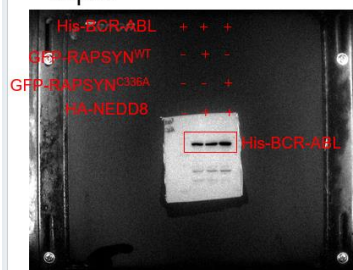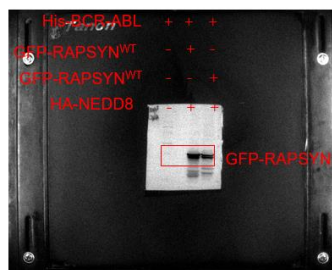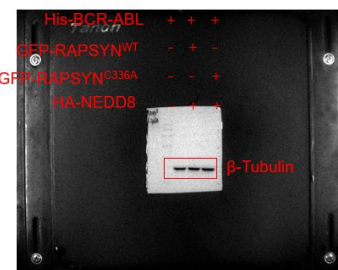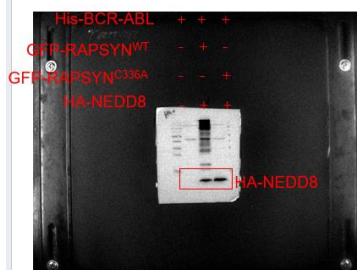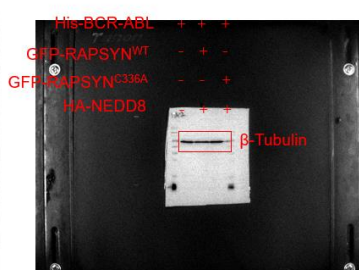

Supplement: fig2-data20 [file elife-88375-fig2-data20-v1.zip]

K

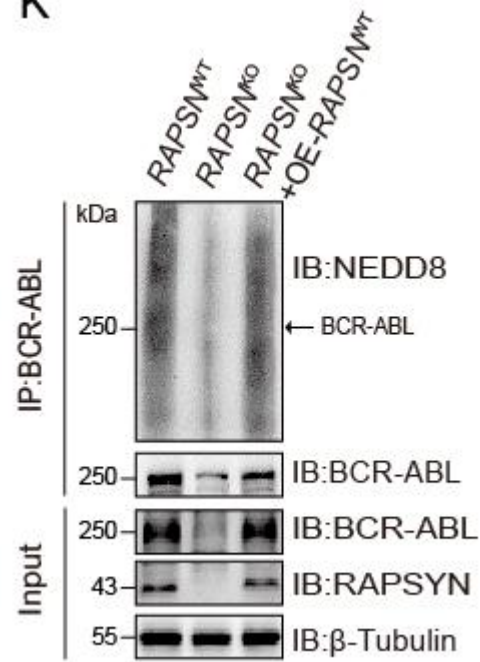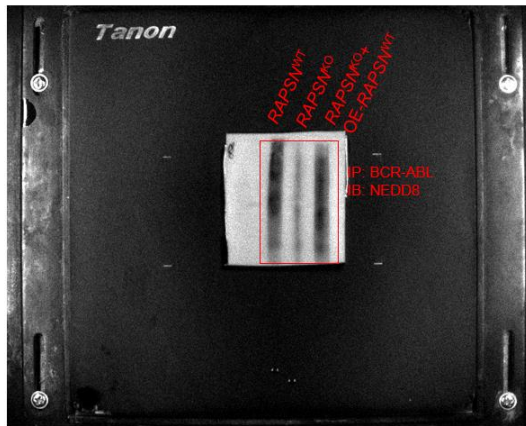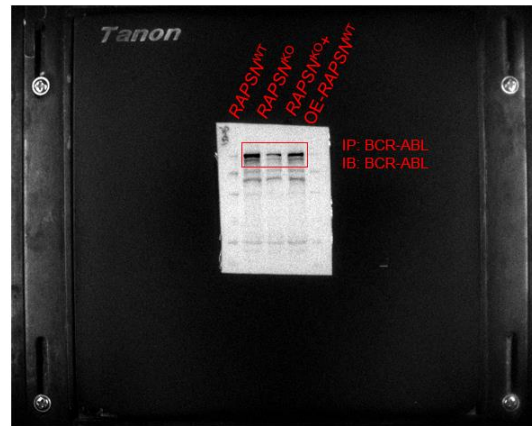

Input

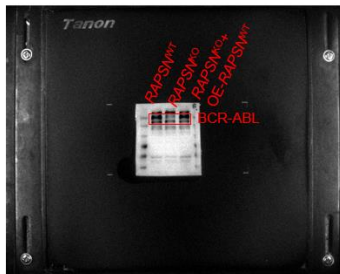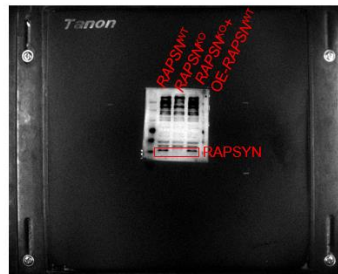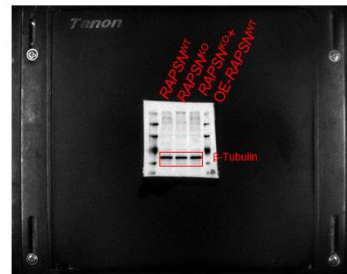

Supplement: fig2-data22 [file elife-88375-fig2-data22-v1.zip]

L

|                      |   |   |   |   |
|----------------------|---|---|---|---|
| ATP-Mg <sup>2+</sup> | + | + | + | + |
| APPBP1/UBA3          | - | + | + | + |
| UBE2M                | + | - | + | + |
| RAPSYN               | + | + | - | + |
| NEDD8                | + | + | + | + |
| His-BCR-ABL          | + | + | + | + |

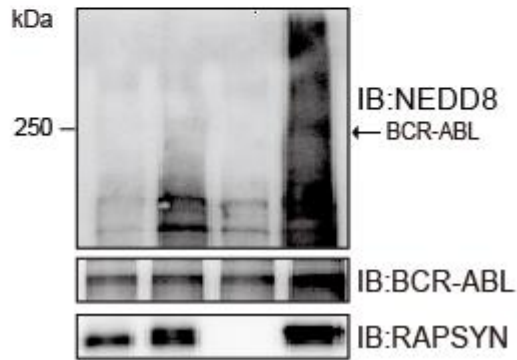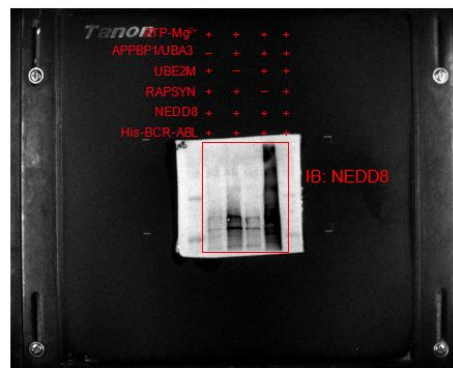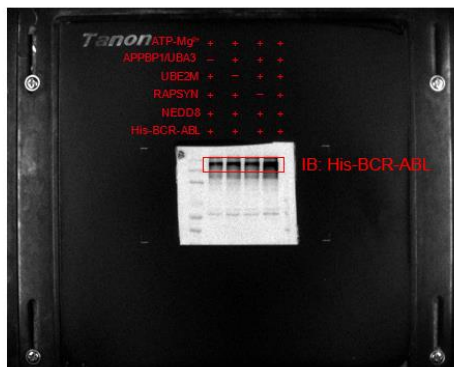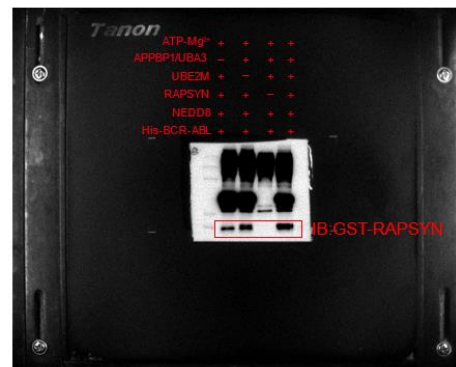

Supplement: fig2-data24 [file elife-88375-fig2-data24-v1.zip]

M

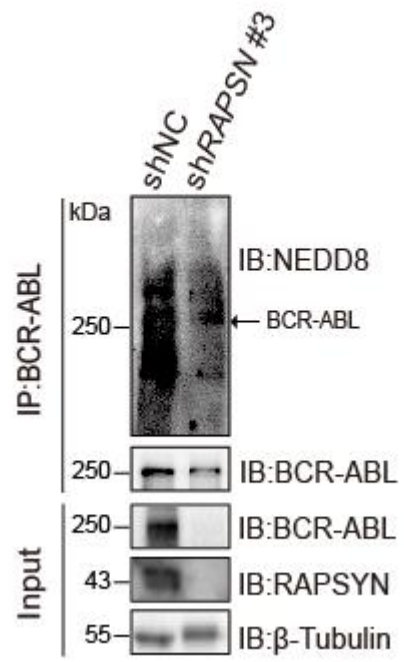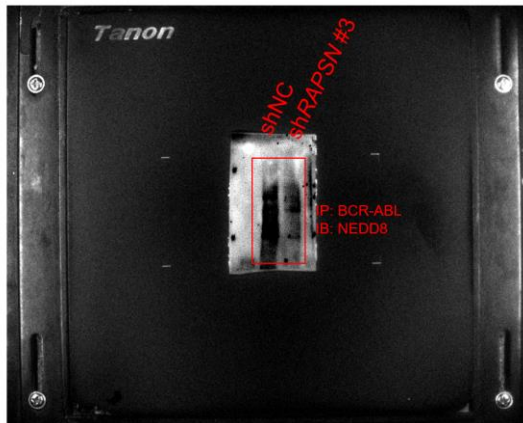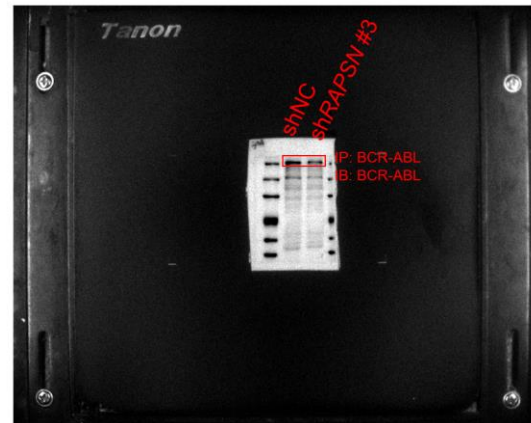

Input

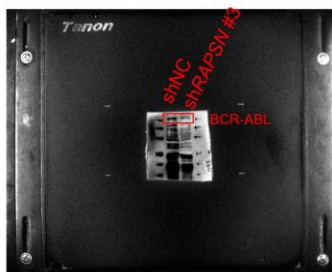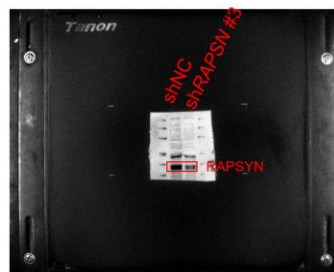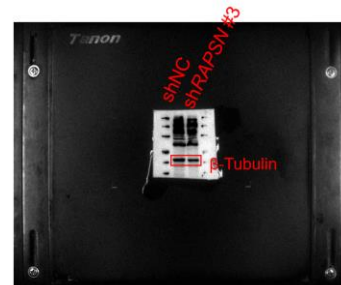

Supplement: fig2-data26 [file elife-88375-fig2-data26-v1.zip]

N

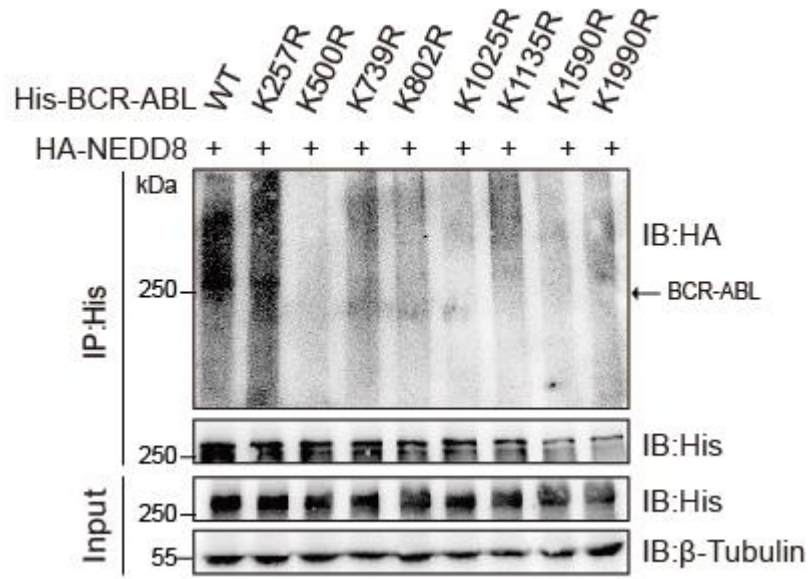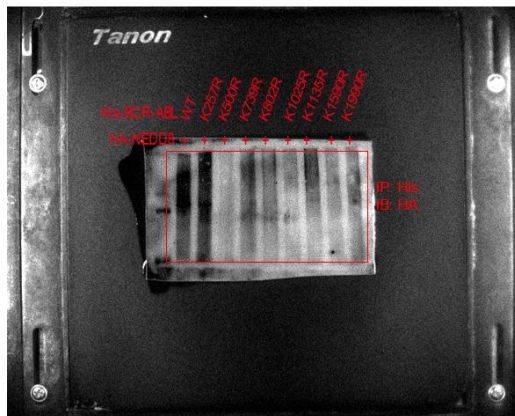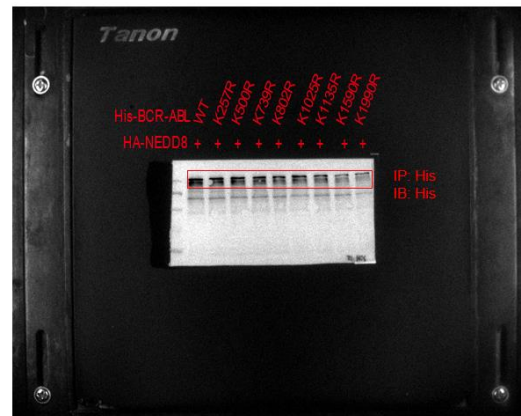

Input

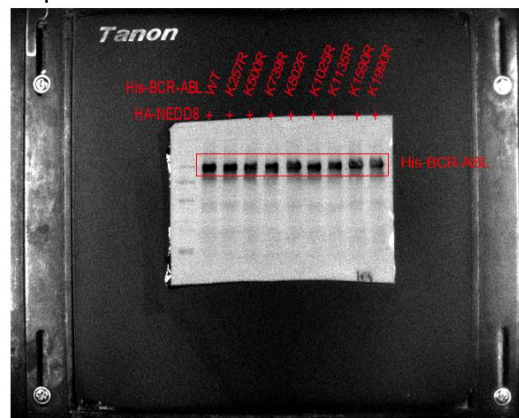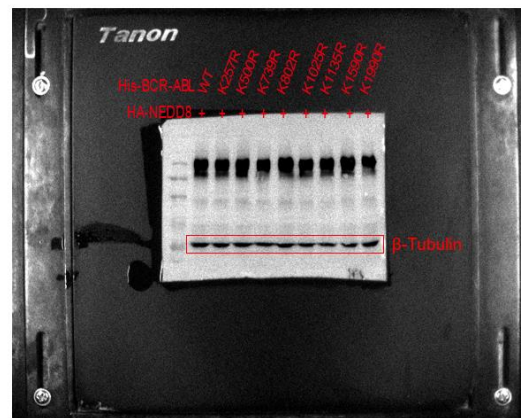

Supplement: fig2-data28 [file elife-88375-fig2-data28-v1.zip]

B

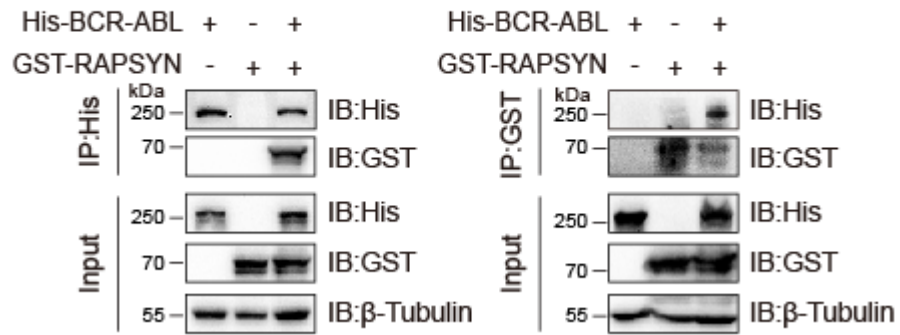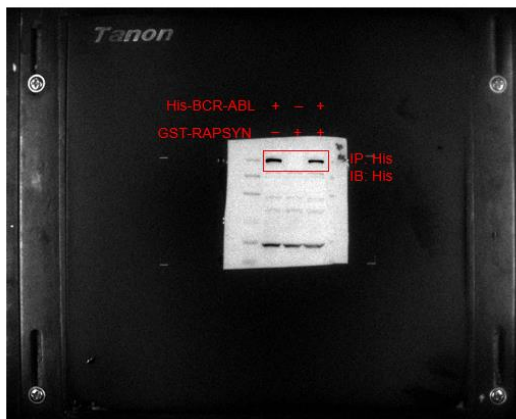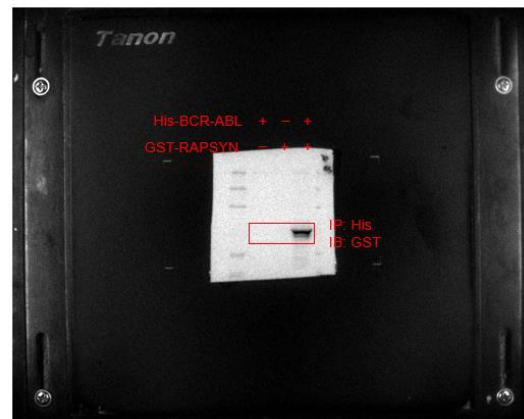

IP: His - Input

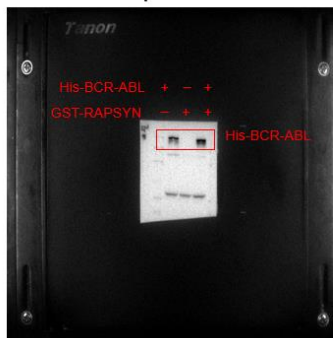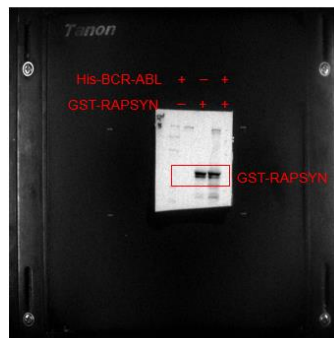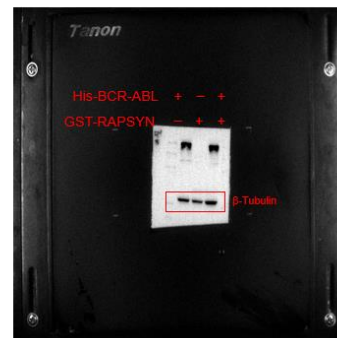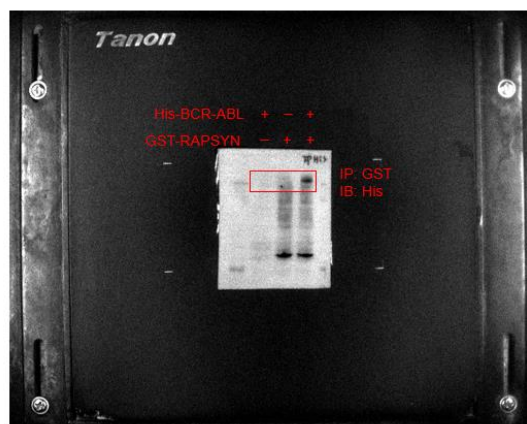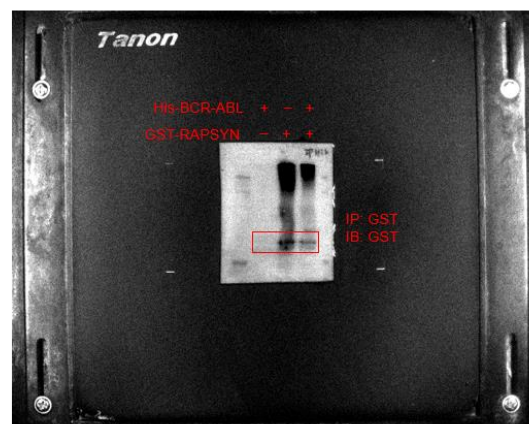

# IP: GST - Input

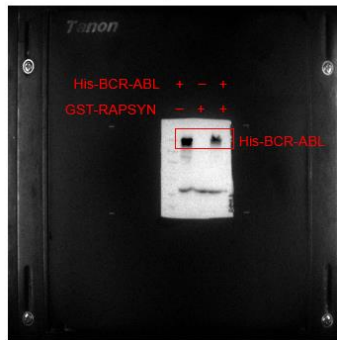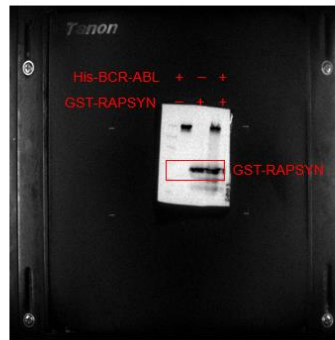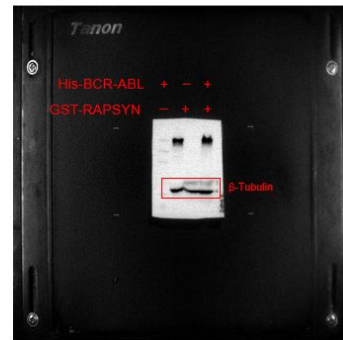

Supplement: fig2-data4 [file elife-88375-fig2-data4-v1.zip]

C

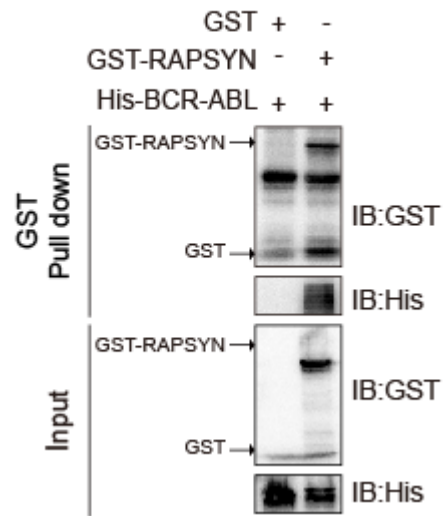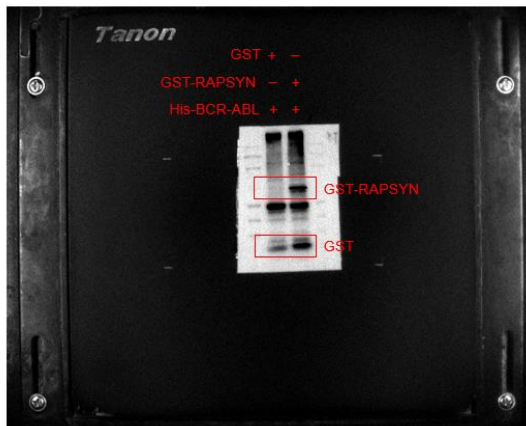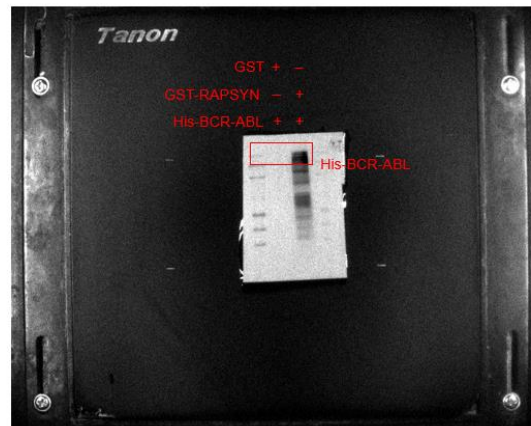

Input

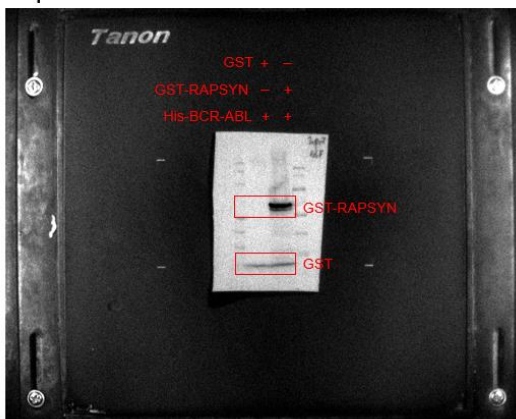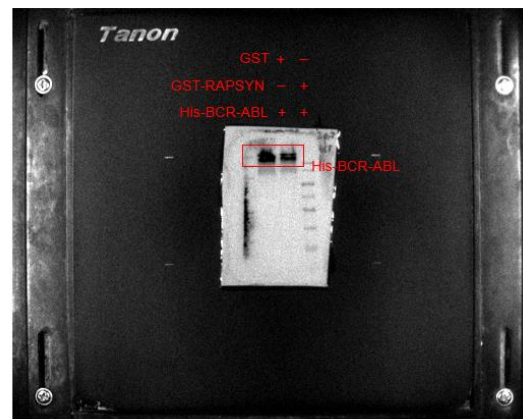

Supplement: fig2-data6 [file elife-88375-fig2-data6-v1.zip]

D

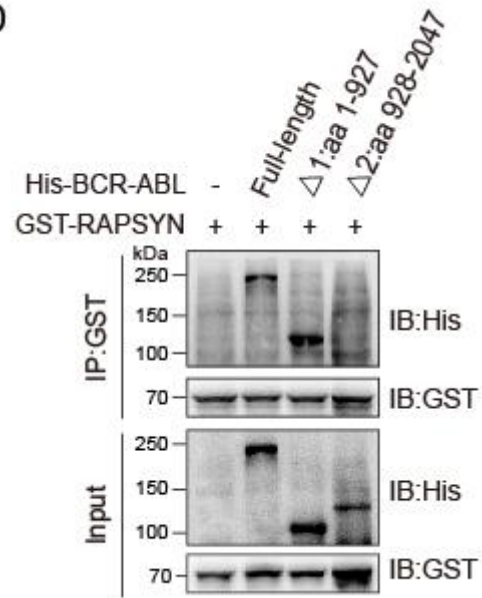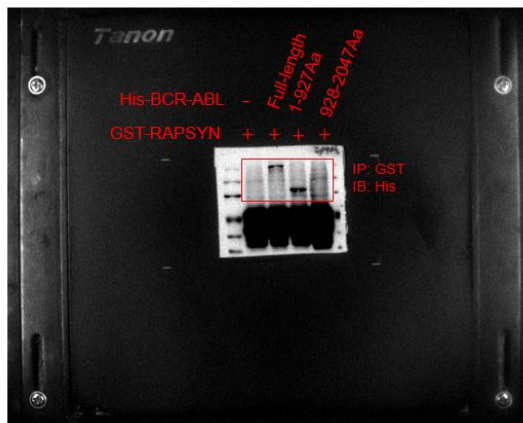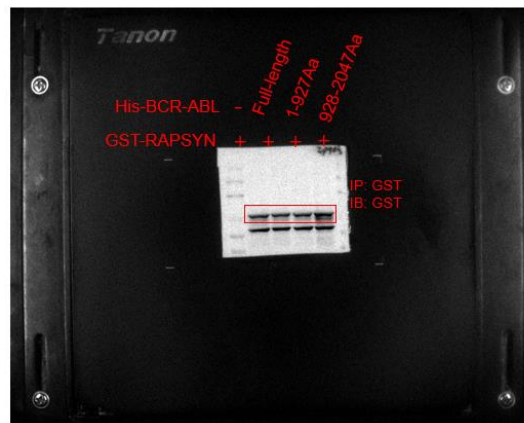

Input

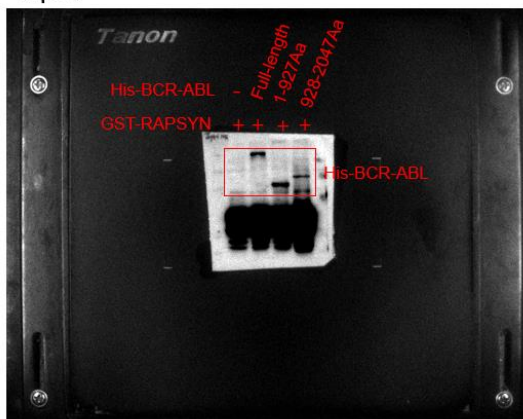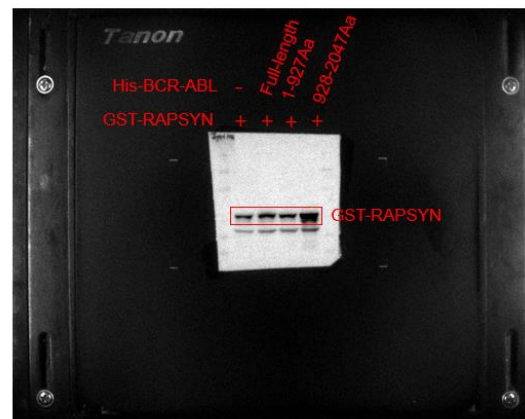

Supplement: fig2-data8 [file elife-88375-fig2-data8-v1.zip]

F

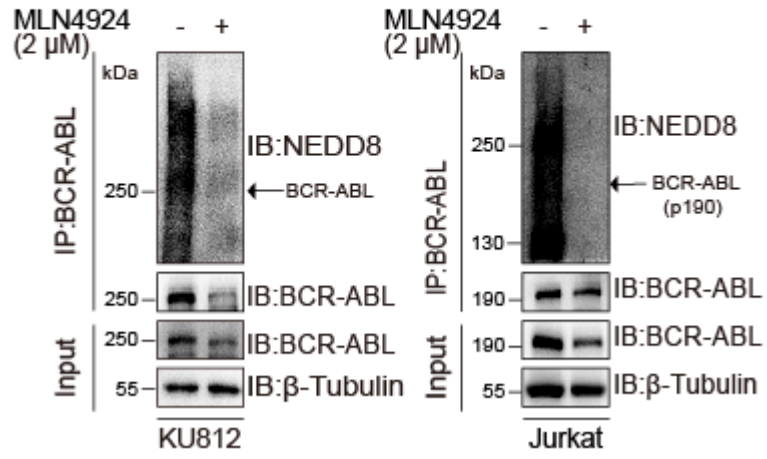

KU812

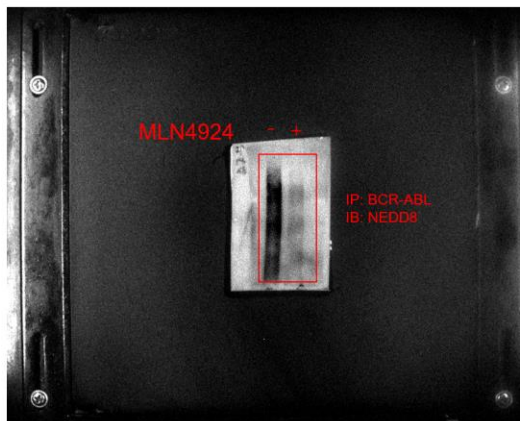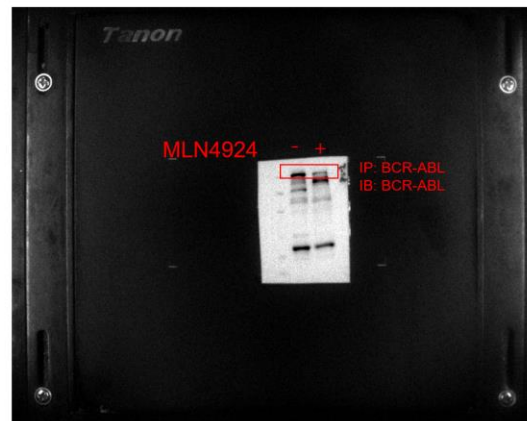

Input

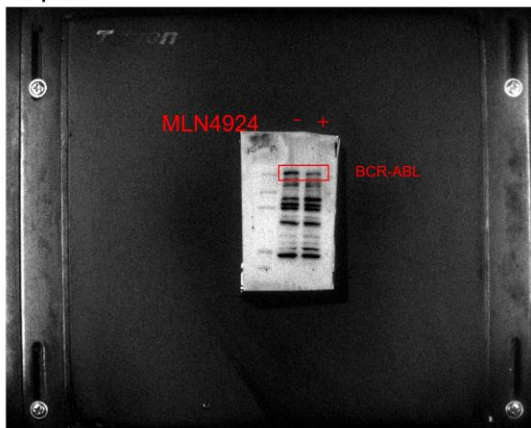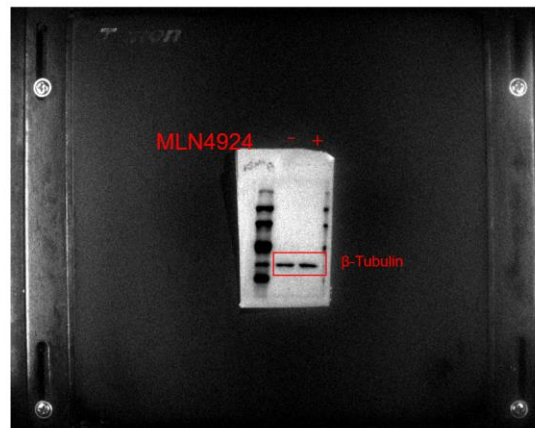

# Jurkat

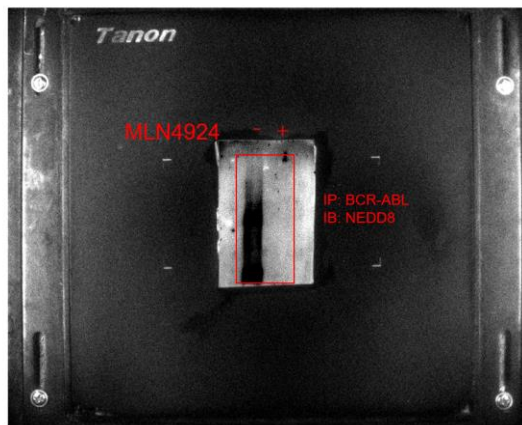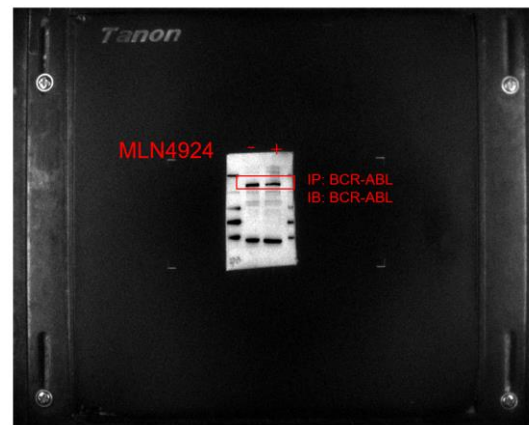

# Input

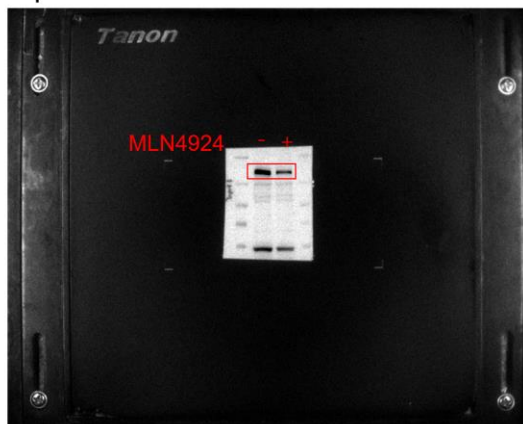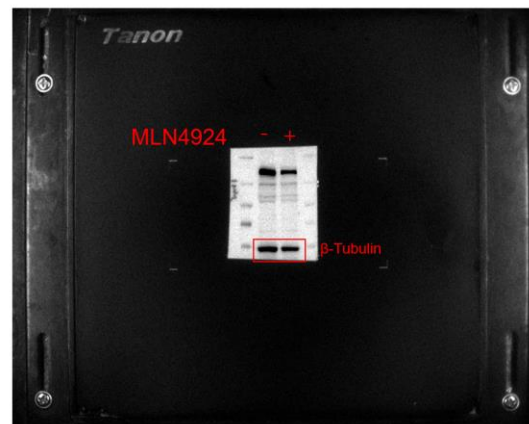

Supplement: fig2-figsupp1-data10 [file elife-88375-fig2-figsupp1-data10-v1.zip]

G

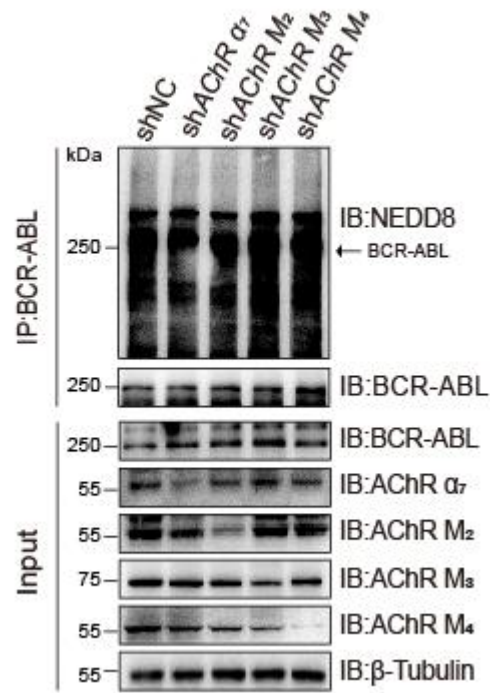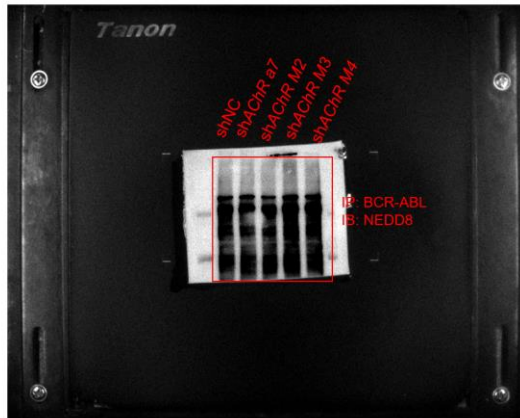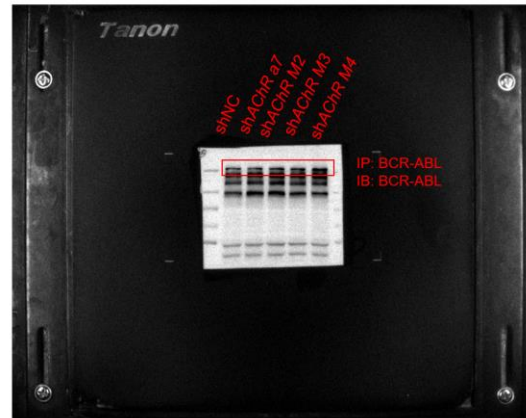

## Input

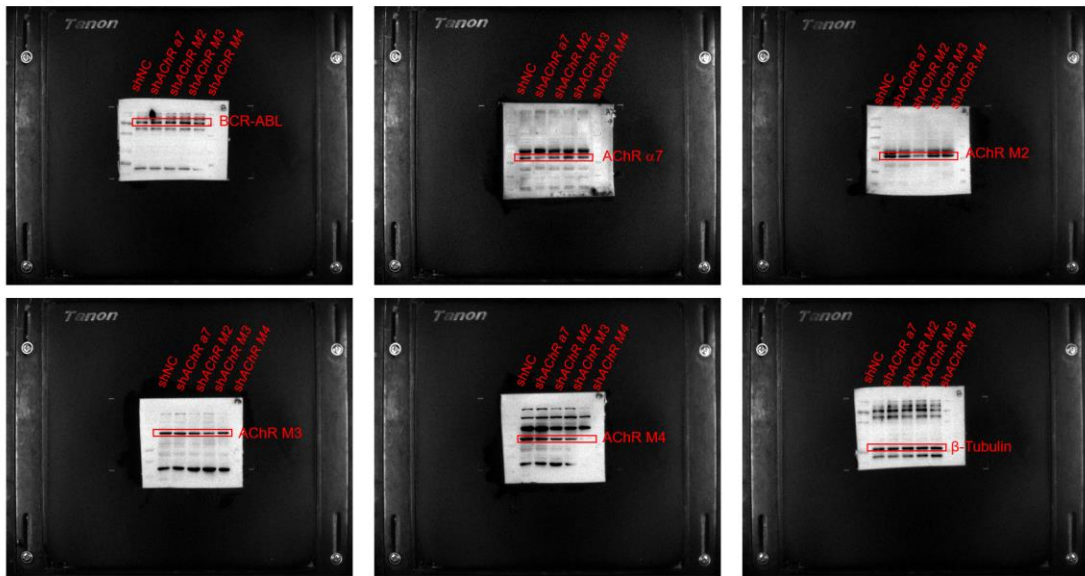

Supplement: fig2-figsupp1-data12 [file elife-88375-fig2-figsupp1-data12-v1.zip]

H

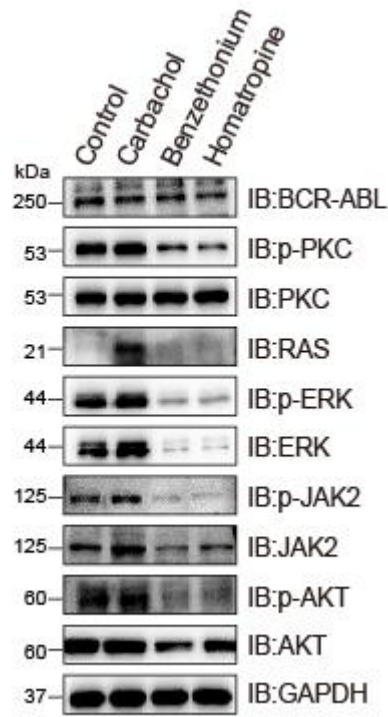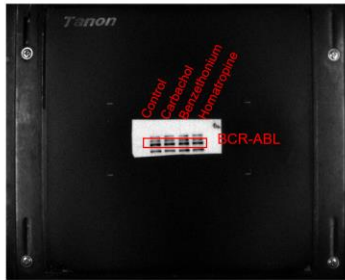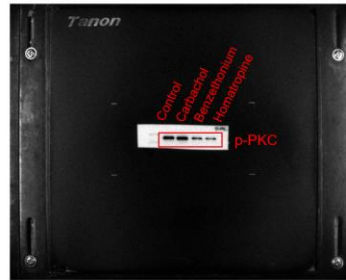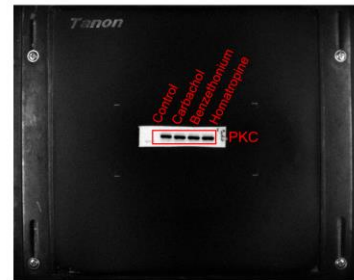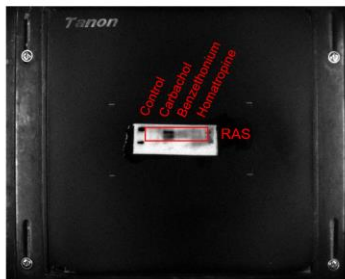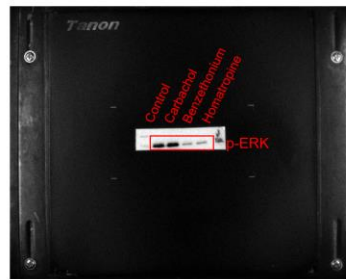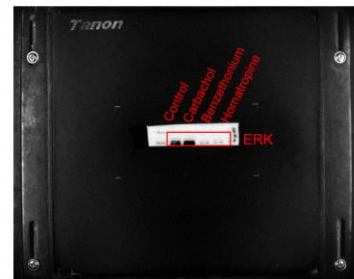

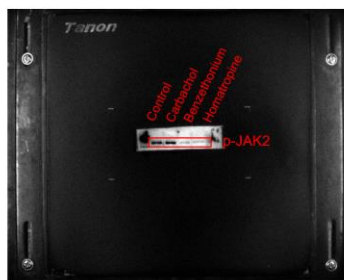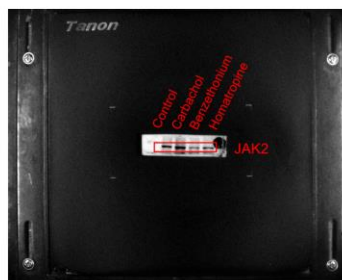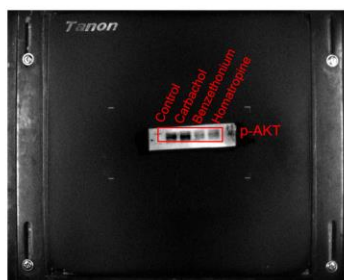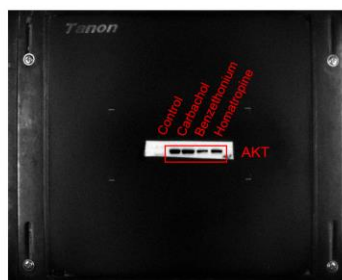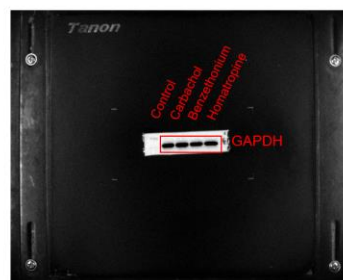

Supplement: fig2-figsupp1-data14 [file elife-88375-fig2-figsupp1-data14-v1.zip]

I

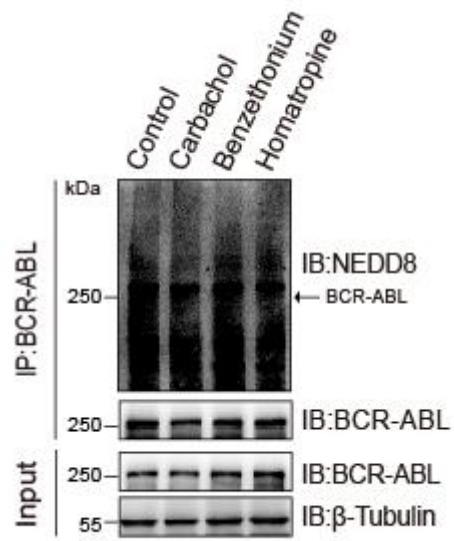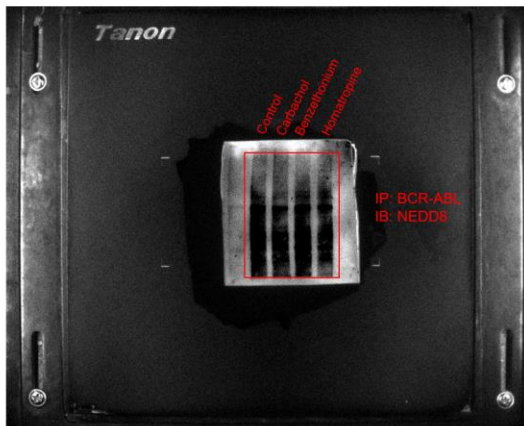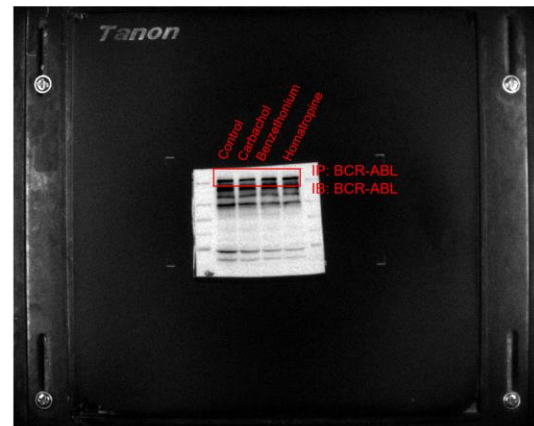

Input

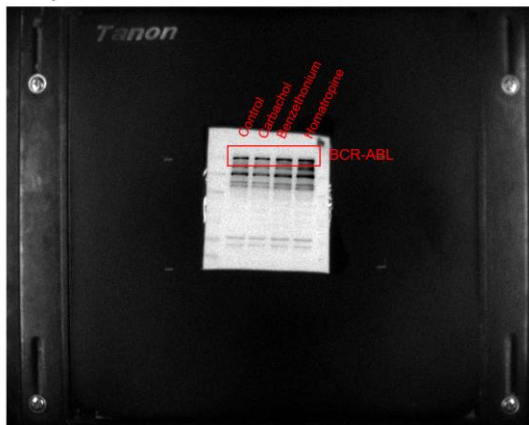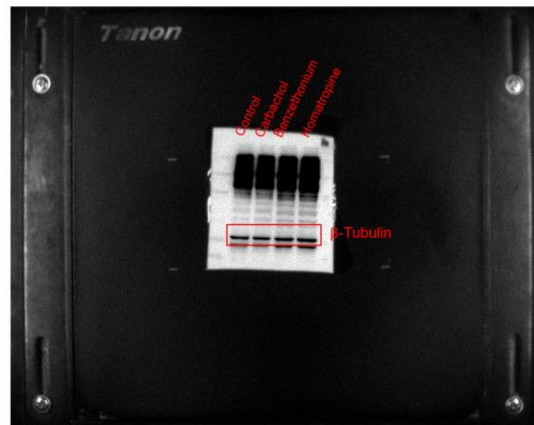

Supplement: fig2-figsupp1-data16 [file elife-88375-fig2-figsupp1-data16-v1.zip]

A

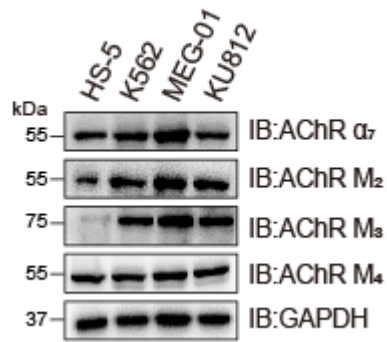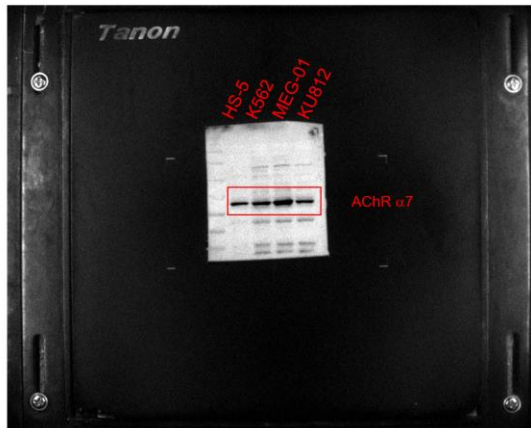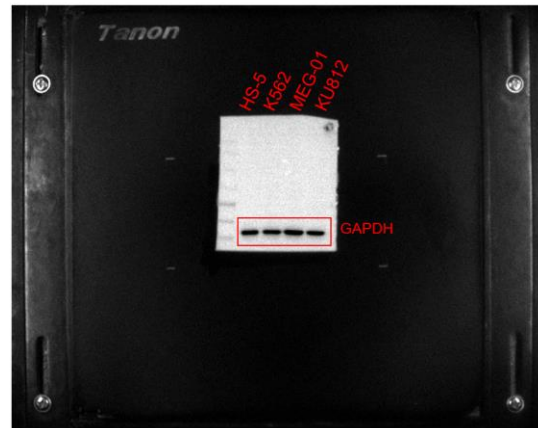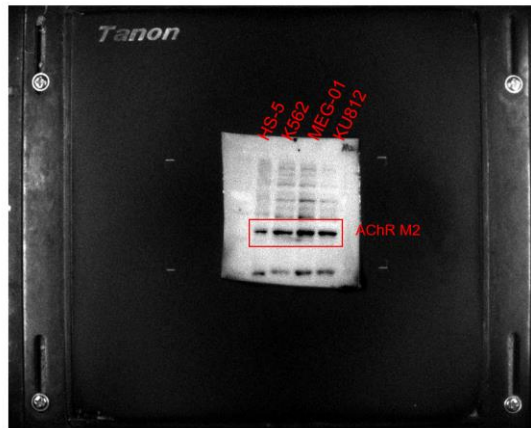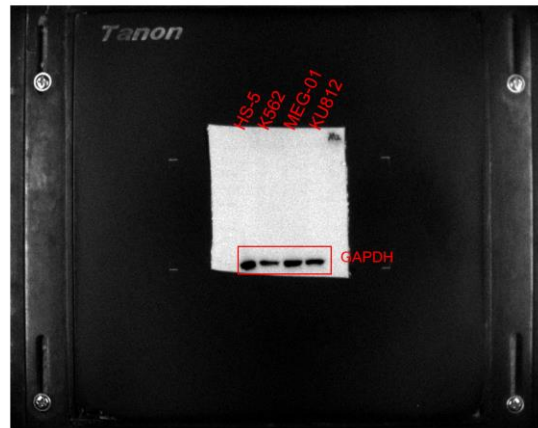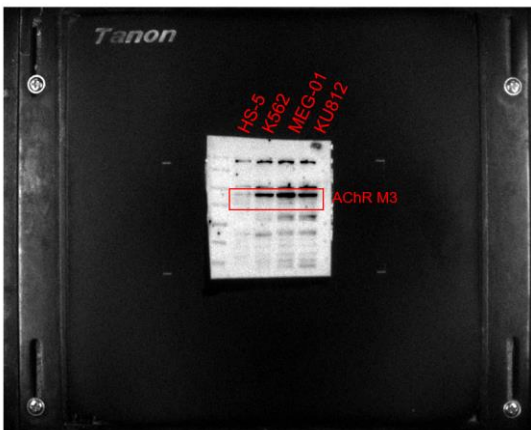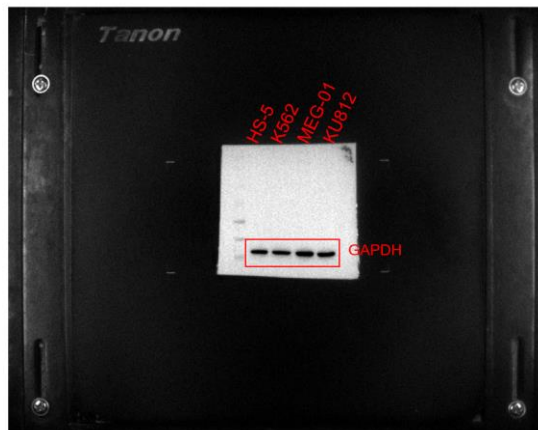

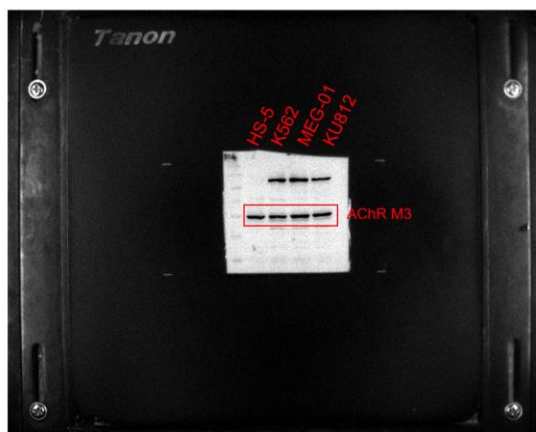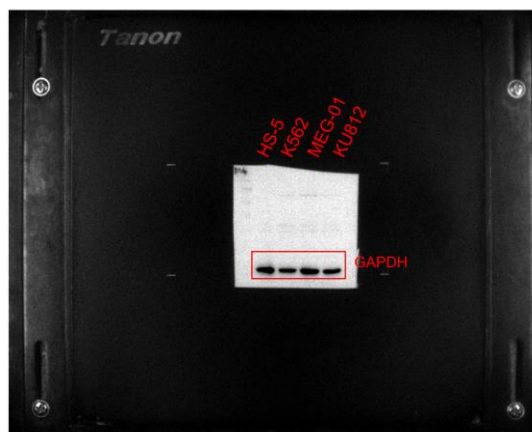

Supplement: fig2-figsupp1-data2 [file elife-88375-fig2-figsupp1-data2-v1.zip]

B

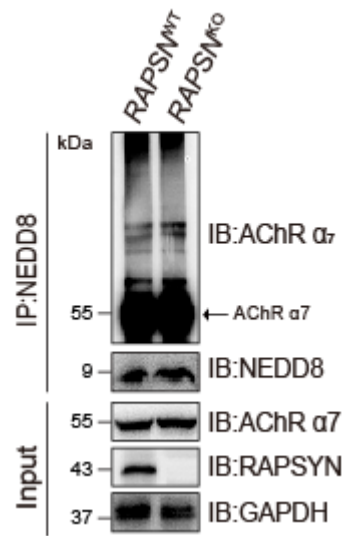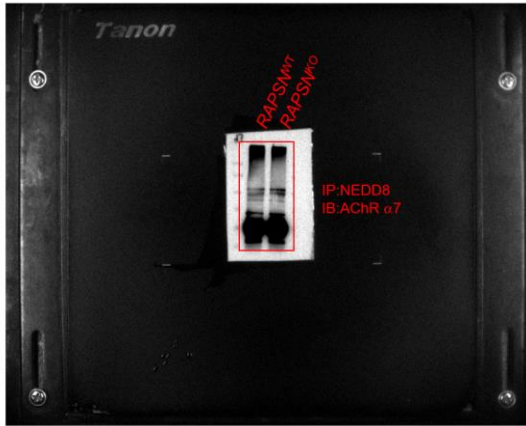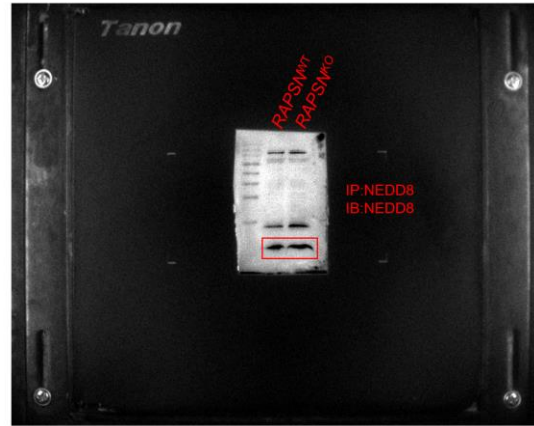

Input

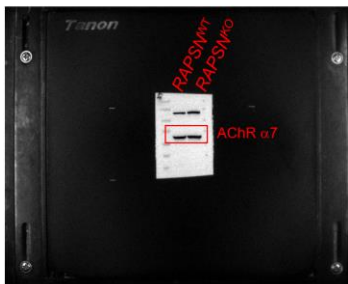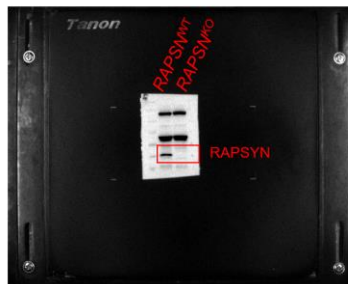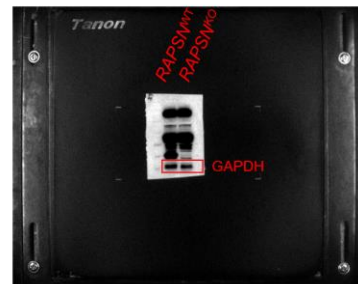

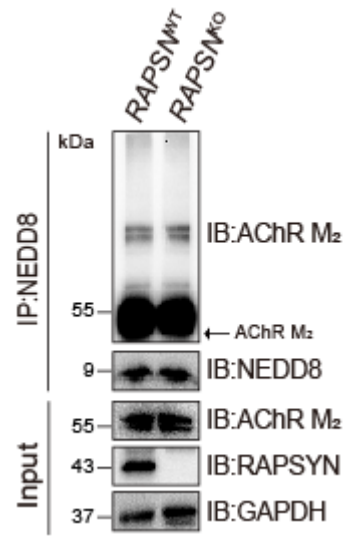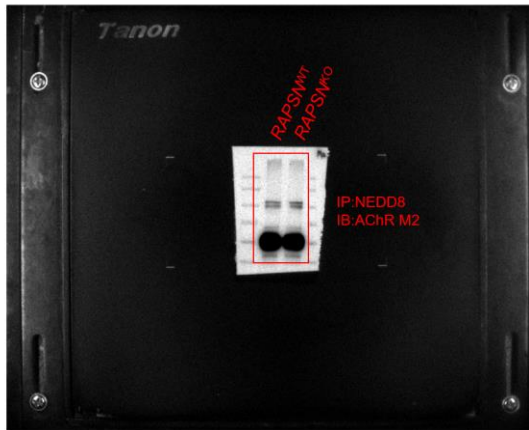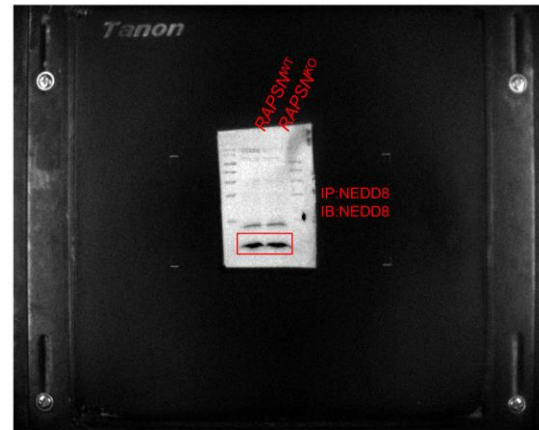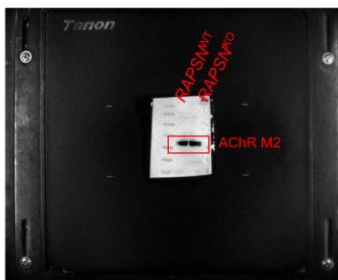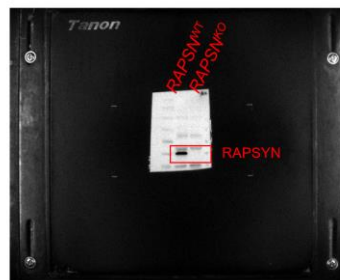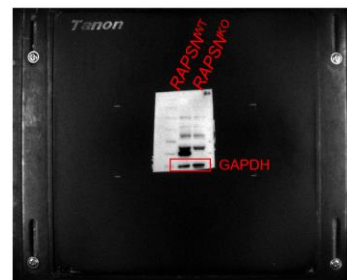

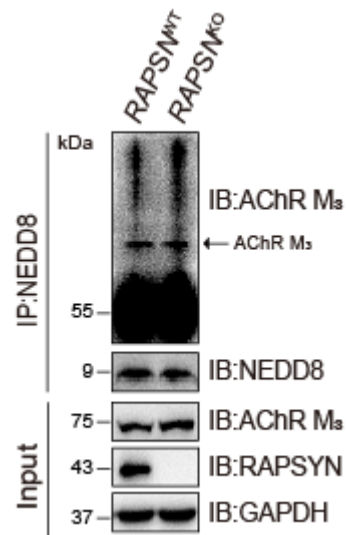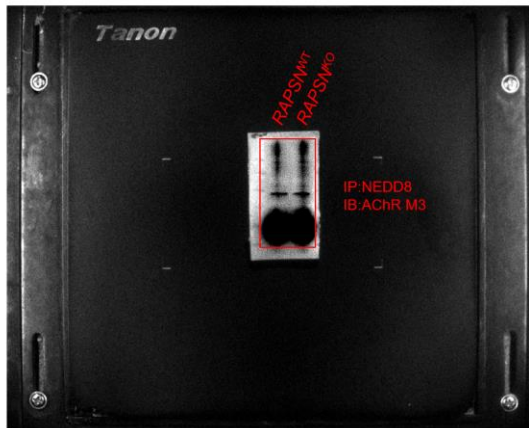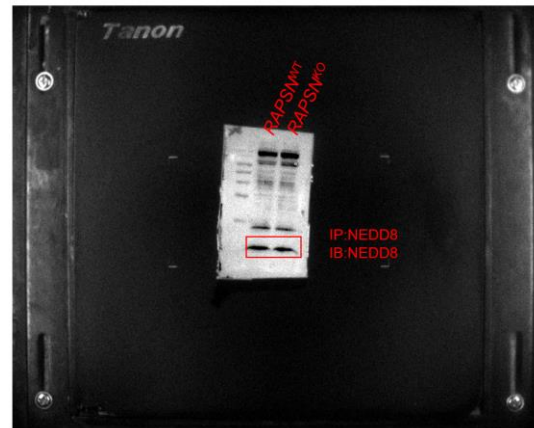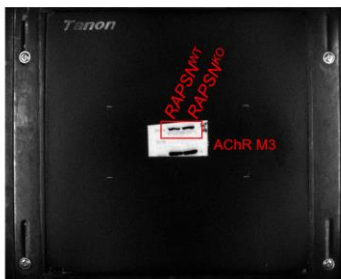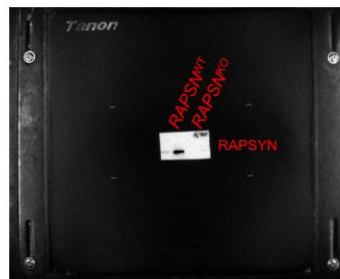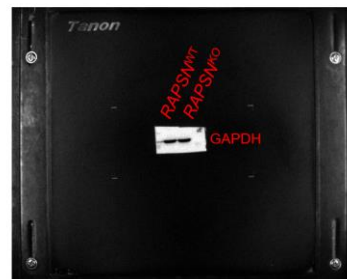

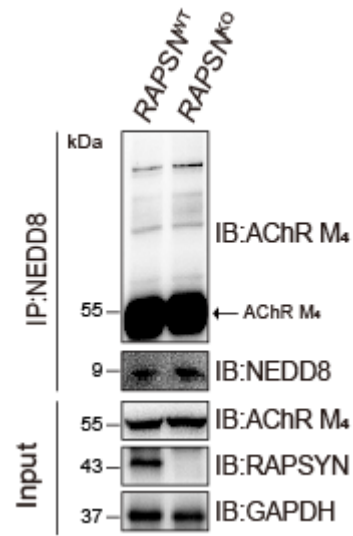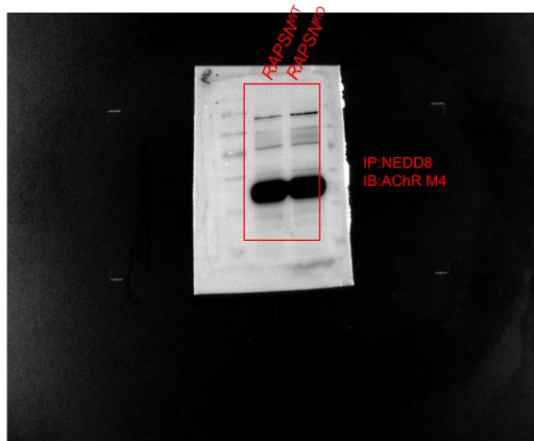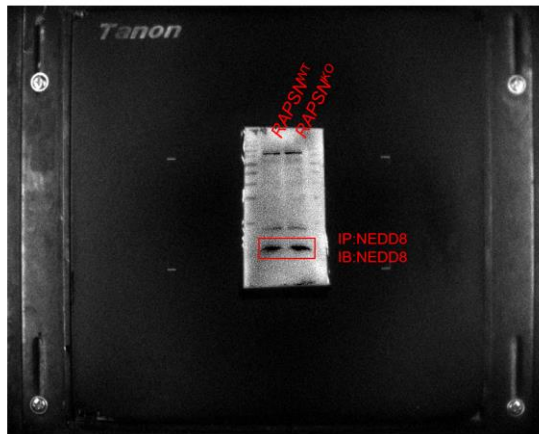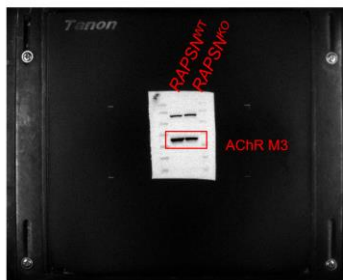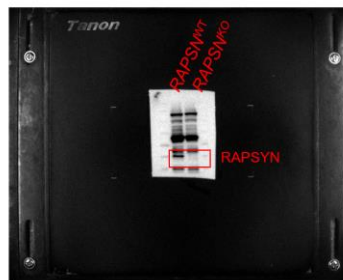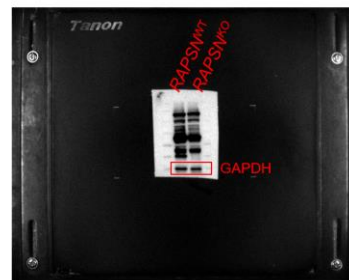

Supplement: fig2-figsupp1-data4 [file elife-88375-fig2-figsupp1-data4-v1.zip]

D

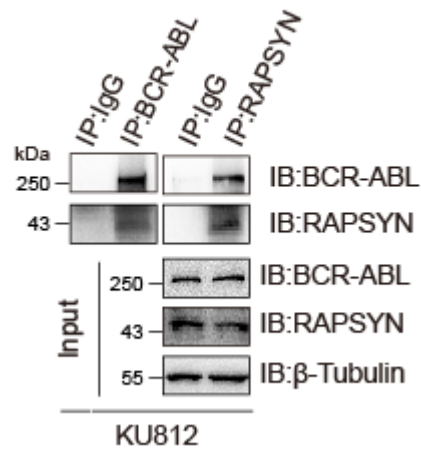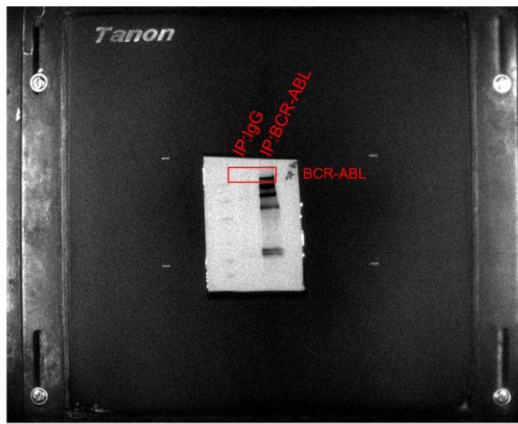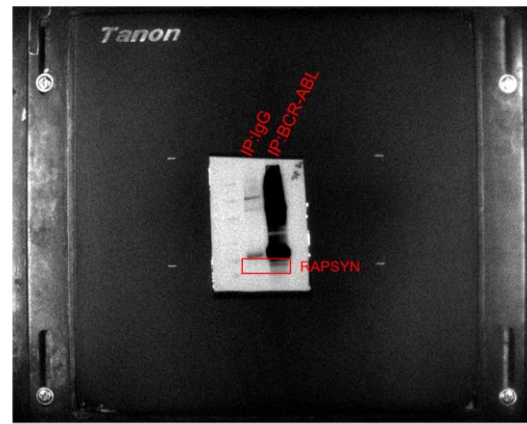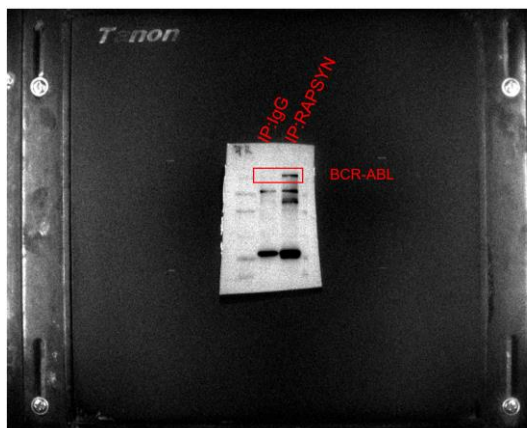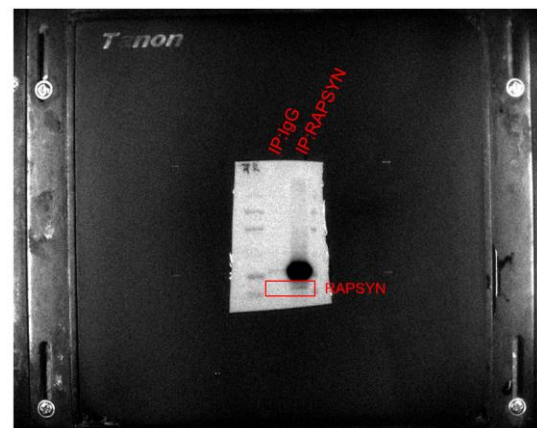

Input

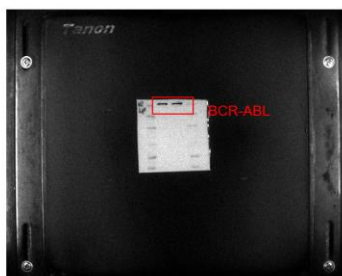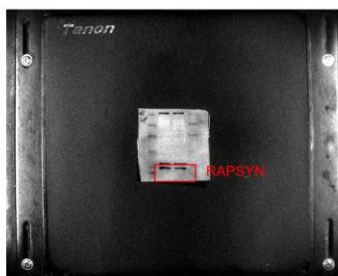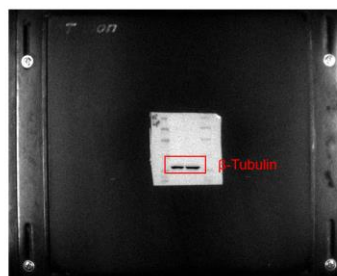

Supplement: fig2-figsupp1-data6 [file elife-88375-fig2-figsupp1-data6-v1.zip]

E

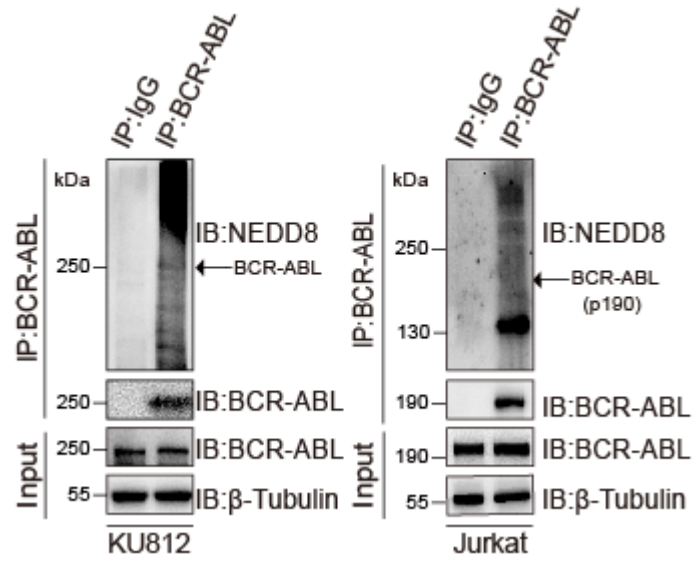

KU812

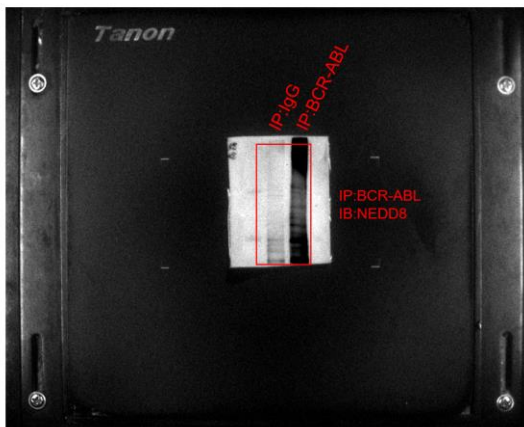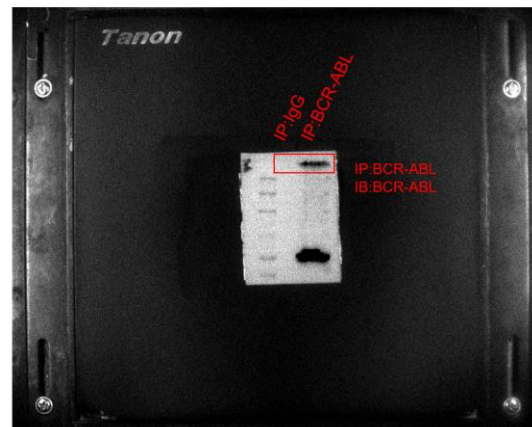

Input

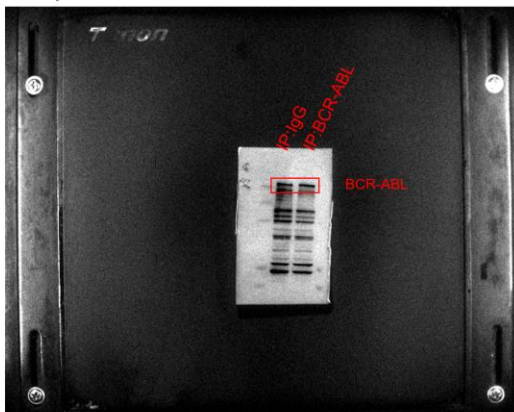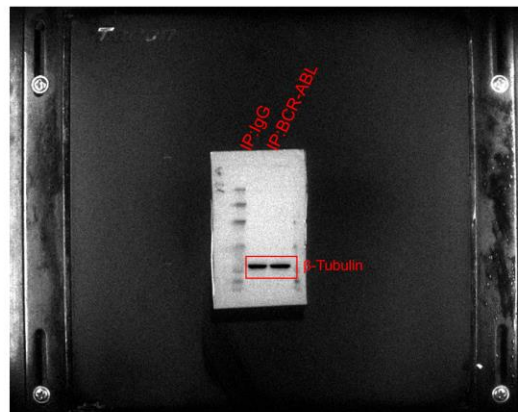

Jurkat

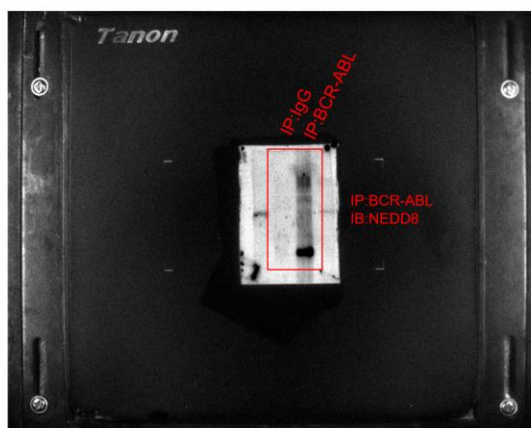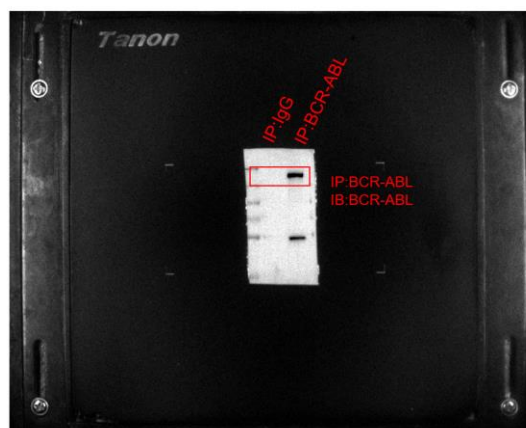

Input

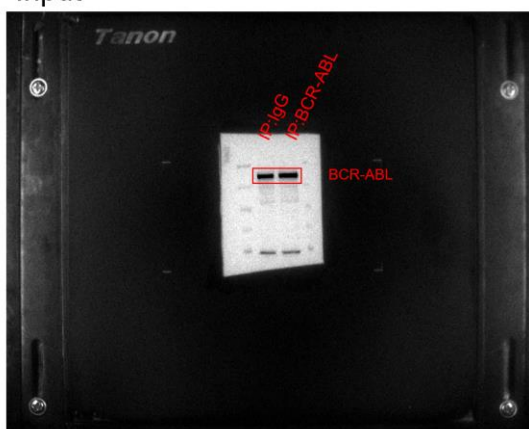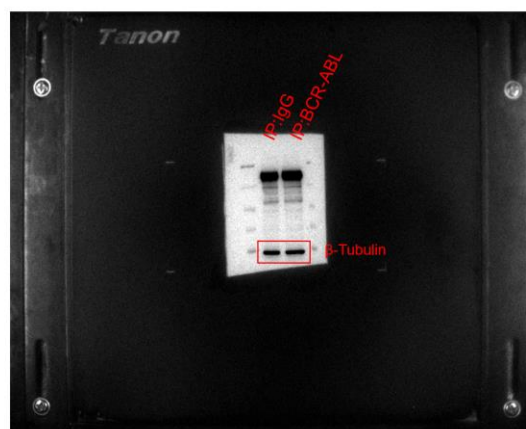

Supplement: fig2-figsupp1-data8 [file elife-88375-fig2-figsupp1-data8-v1.zip]

E

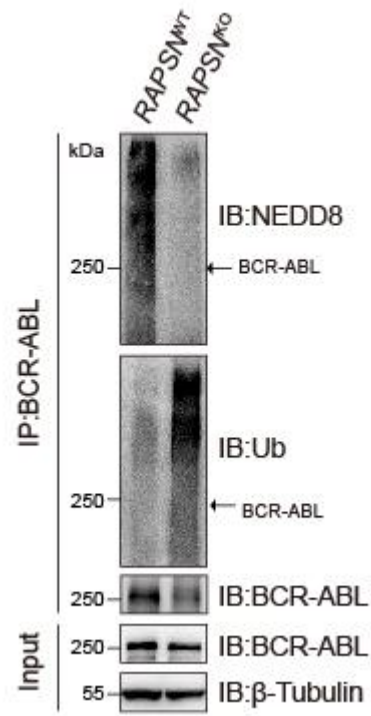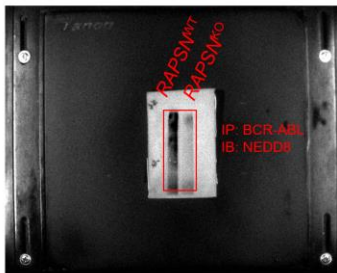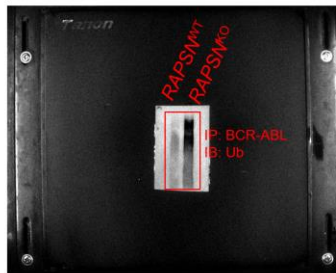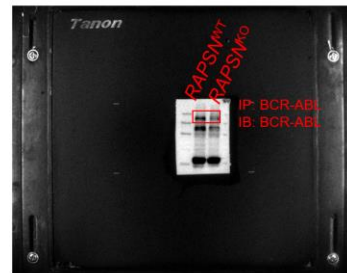

Input

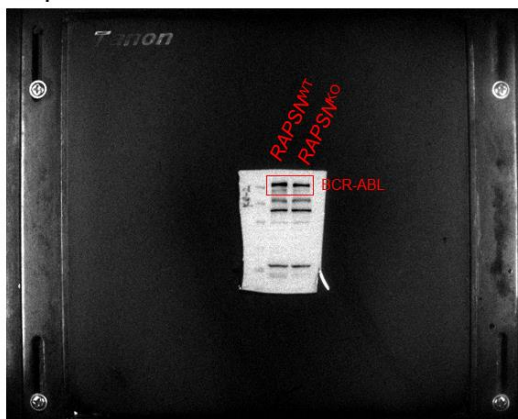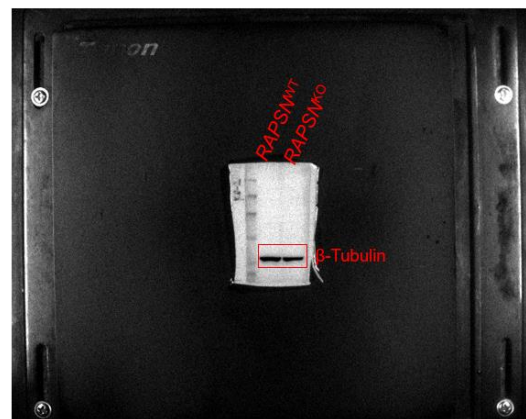

Supplement: fig3-data10 [file elife-88375-fig3-data10-v1.zip]

F

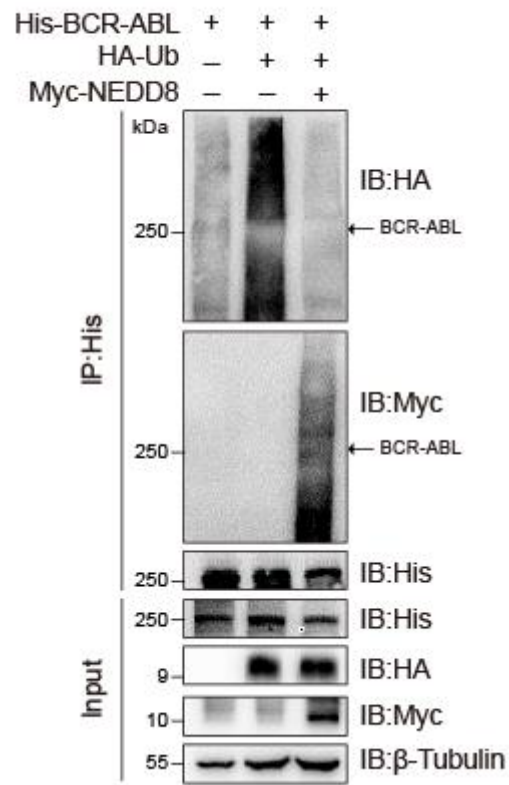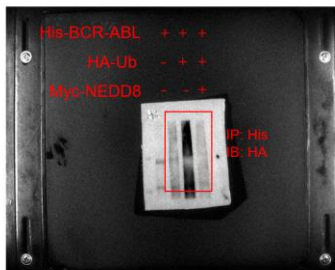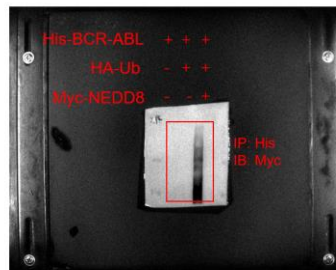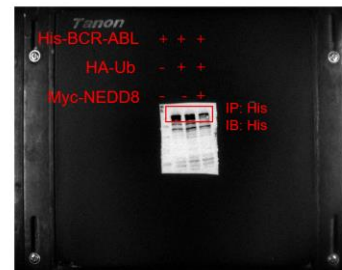

# Input

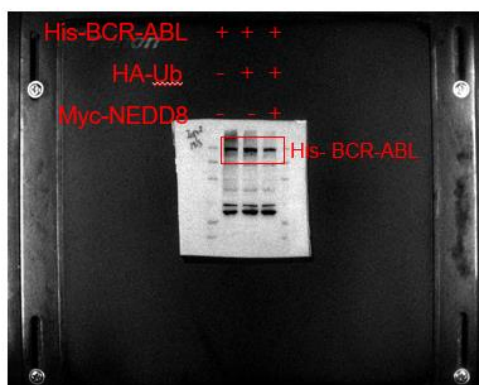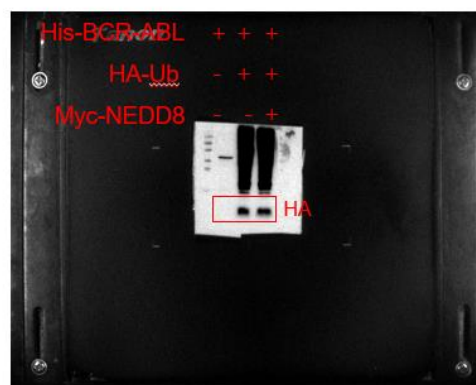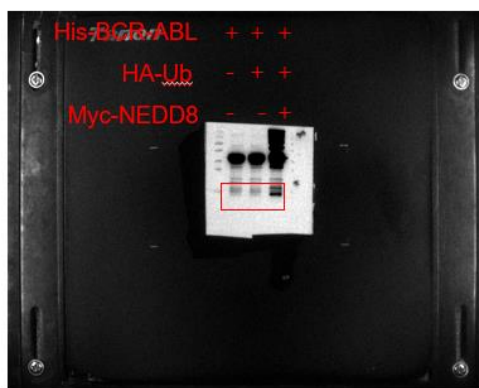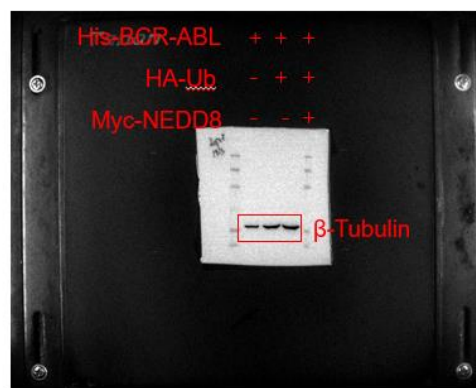

Supplement: fig3-data12 [file elife-88375-fig3-data12-v1.zip]

G

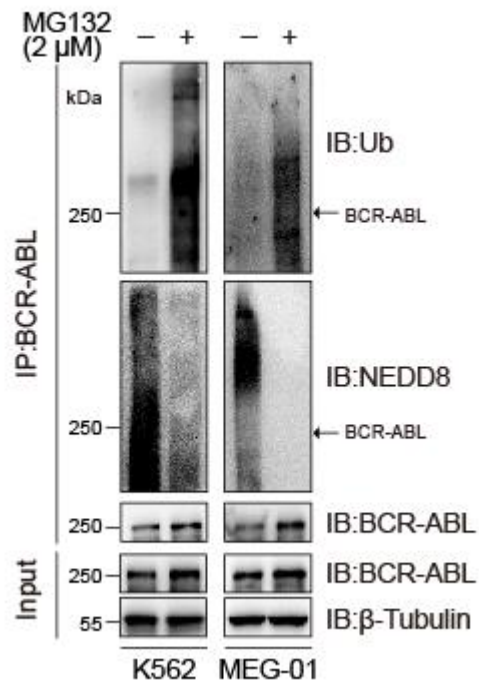

K562

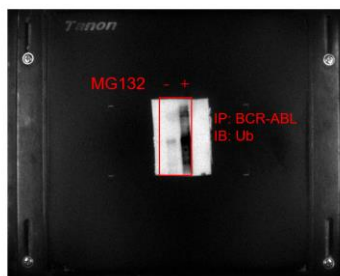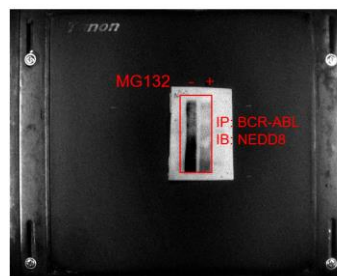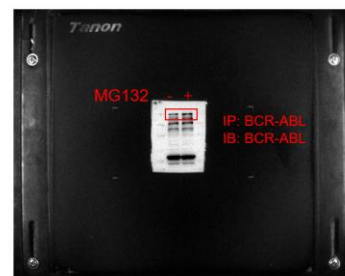

Input

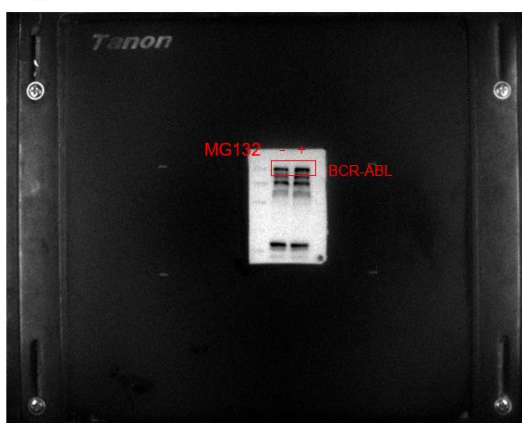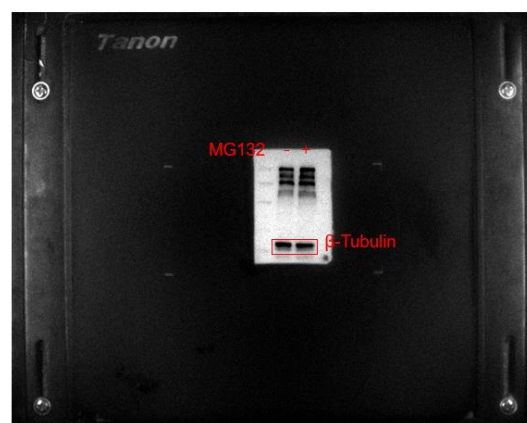

## MEG-01

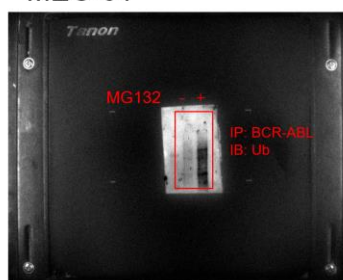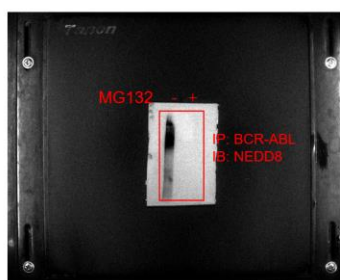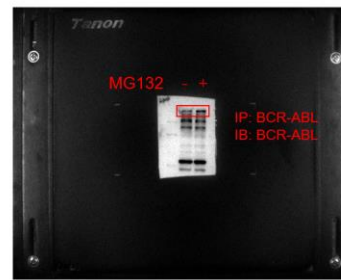

## Input

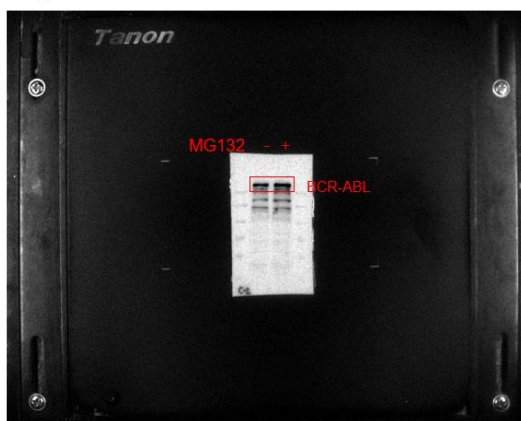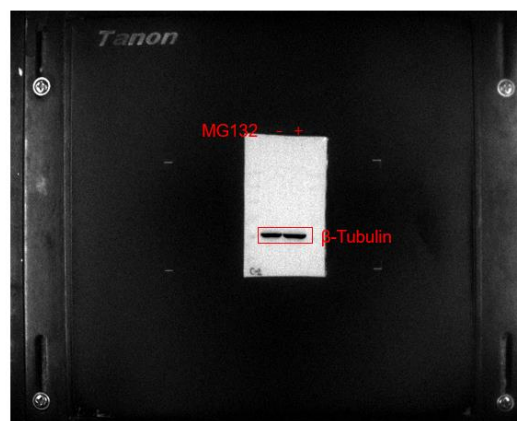

Supplement: fig3-data14 [file elife-88375-fig3-data14-v1.zip]

H

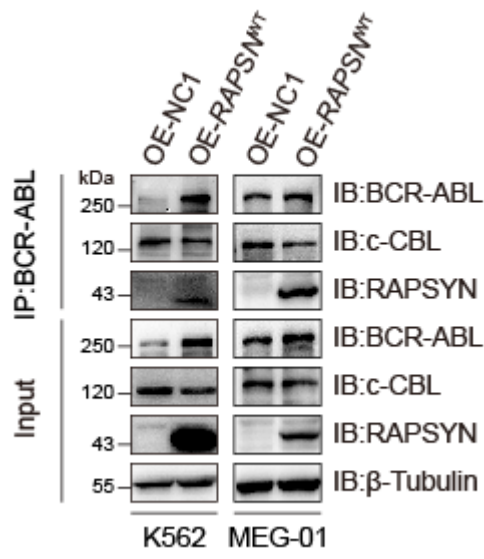

K562

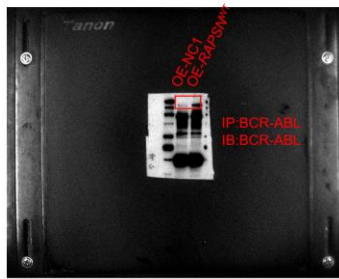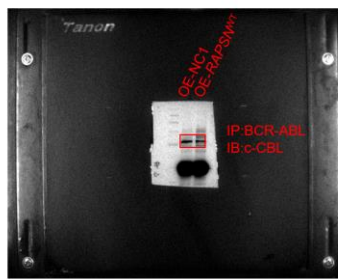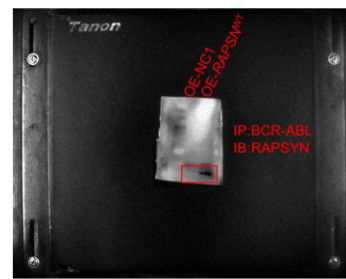

## Input

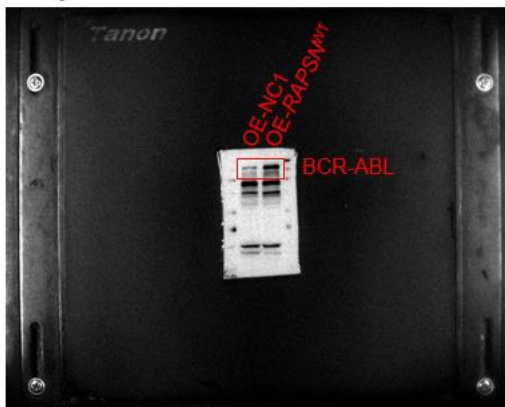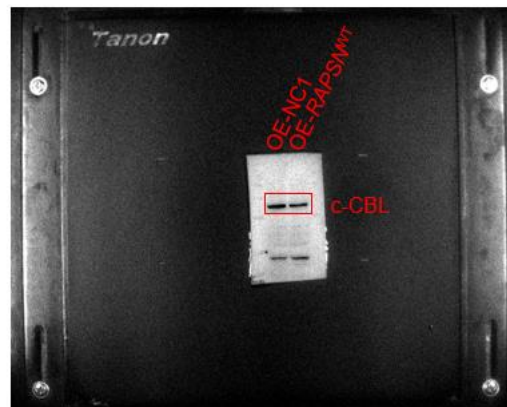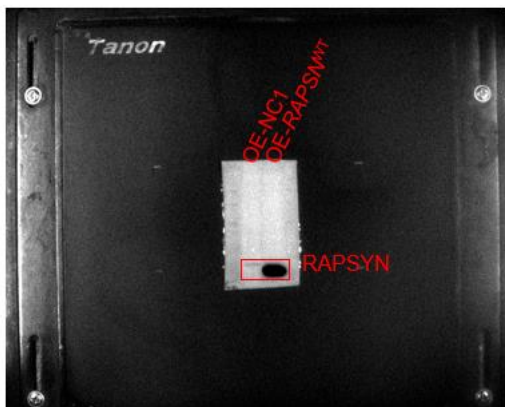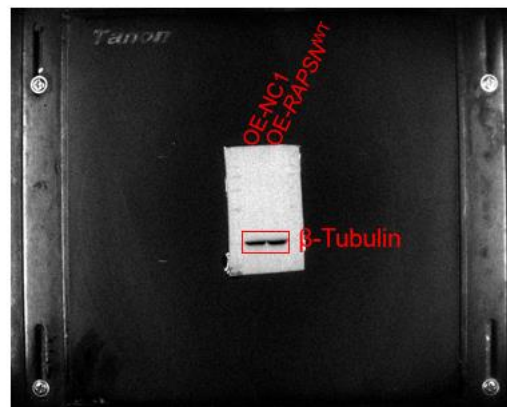

## MEG-01

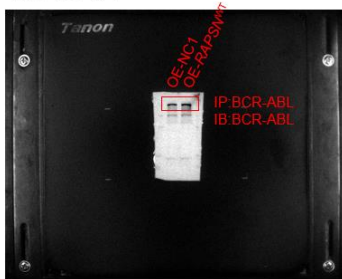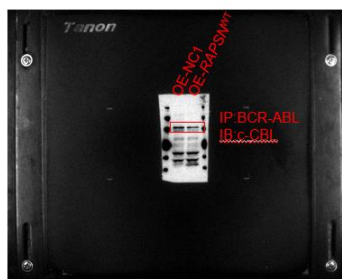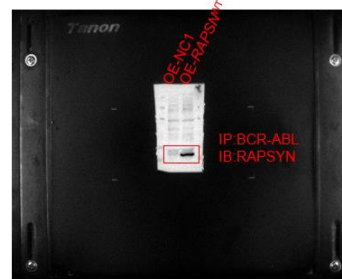

# Input

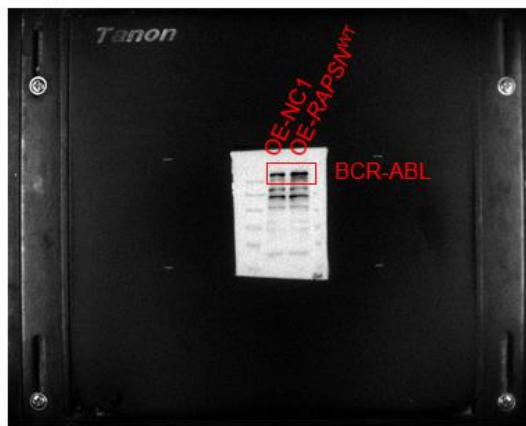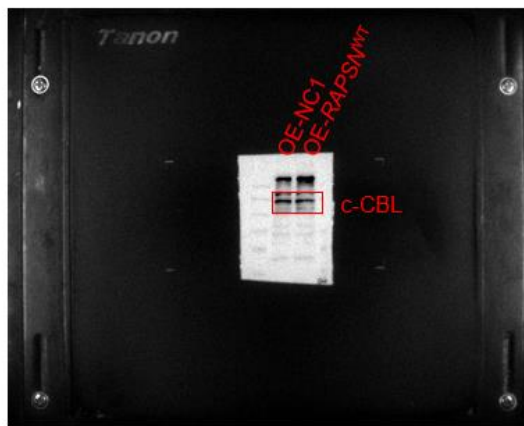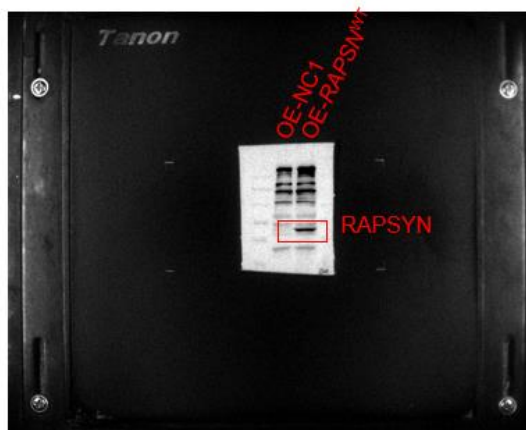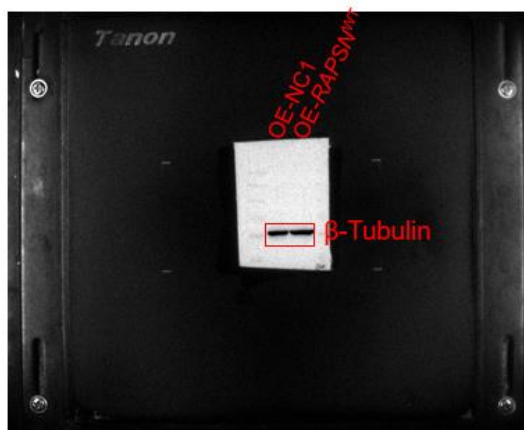

Supplement: fig3-data16 [file elife-88375-fig3-data16-v1.zip]

I

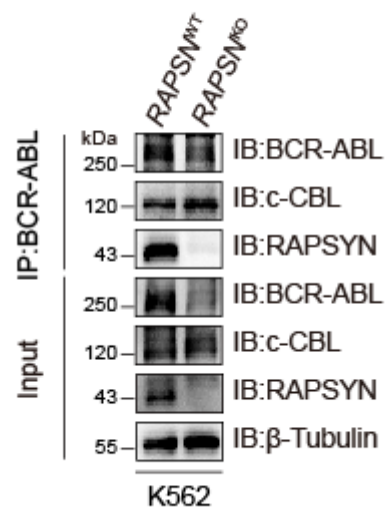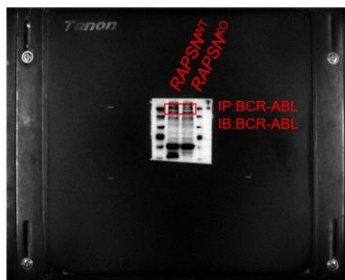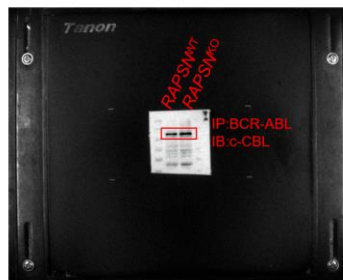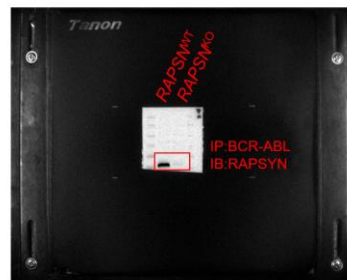

## Input

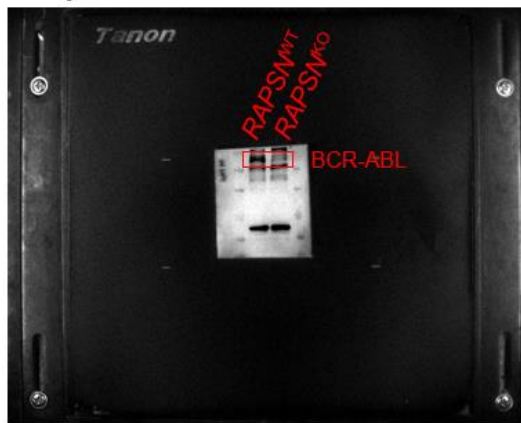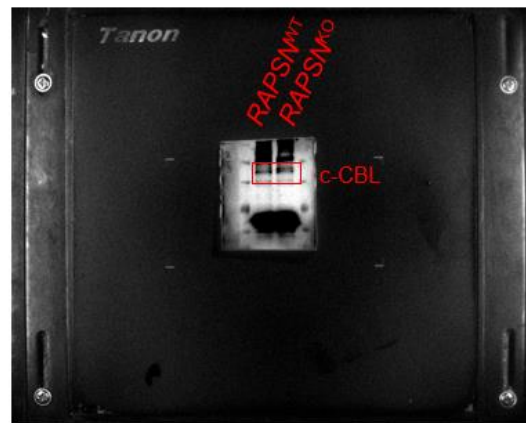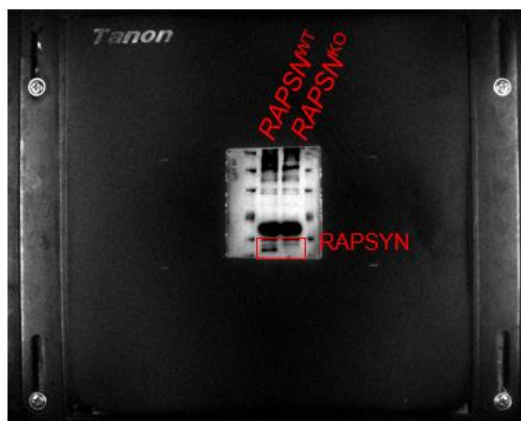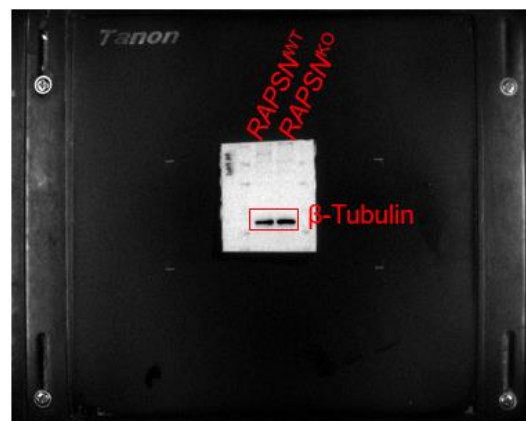

Supplement: fig3-data18 [file elife-88375-fig3-data18-v1.zip]

A

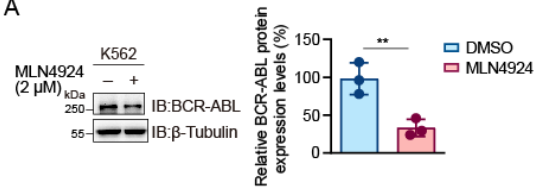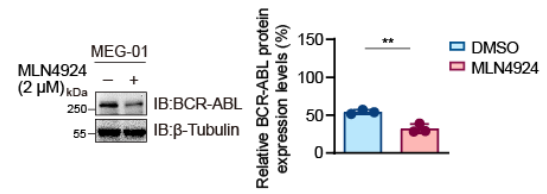

K562

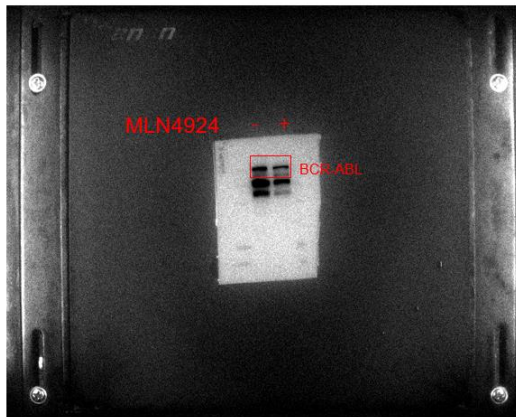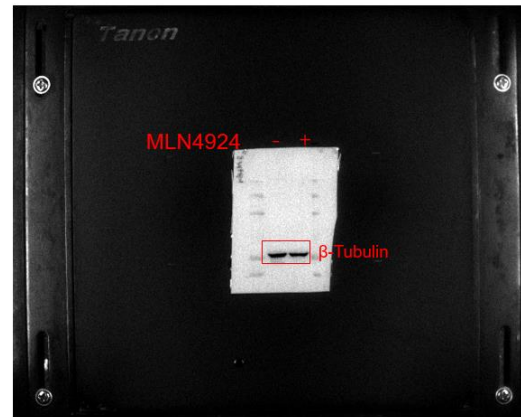

MEG-01

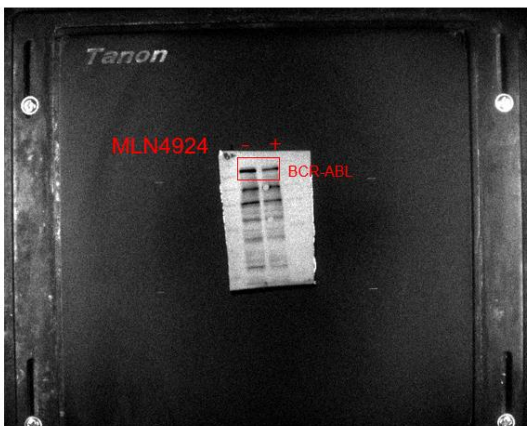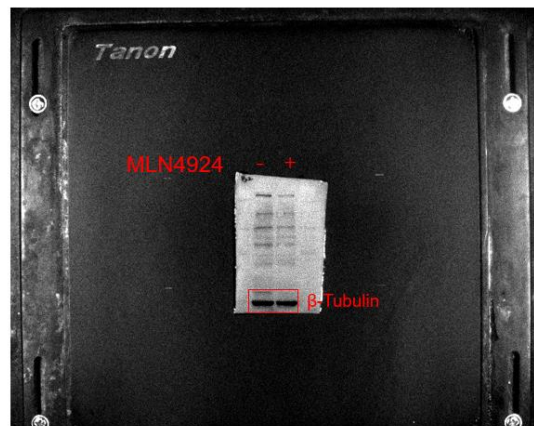

Supplement: fig3-data2 [file elife-88375-fig3-data2-v1.zip]

B

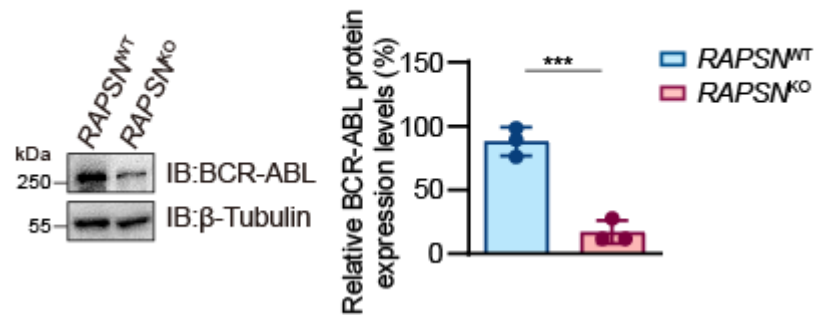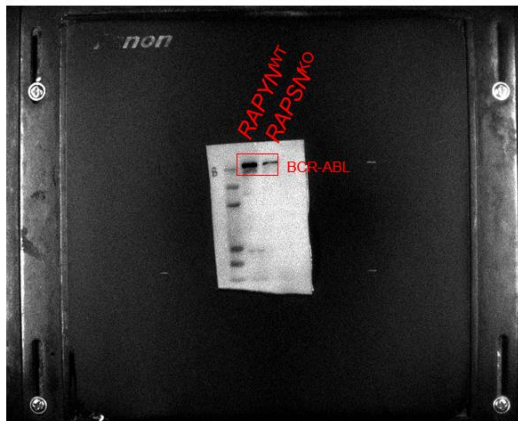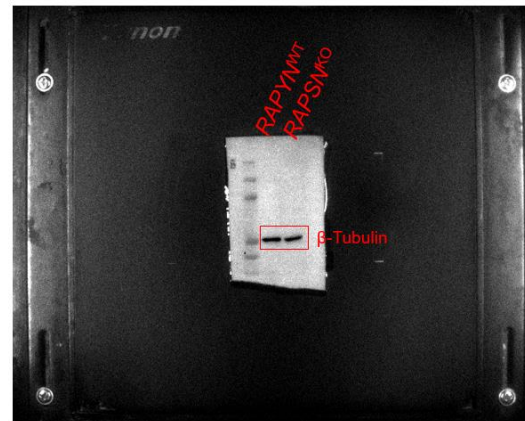

Supplement: fig3-data4 [file elife-88375-fig3-data4-v1.zip]

C

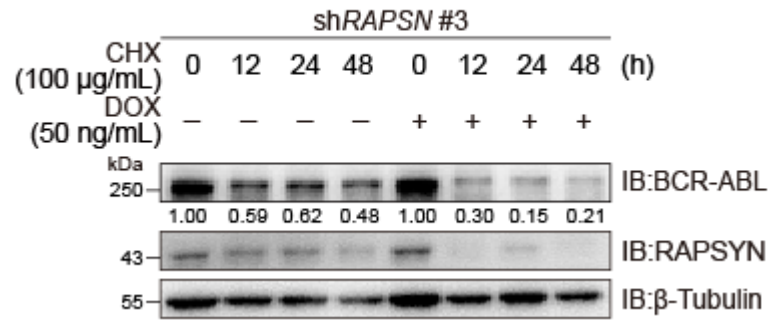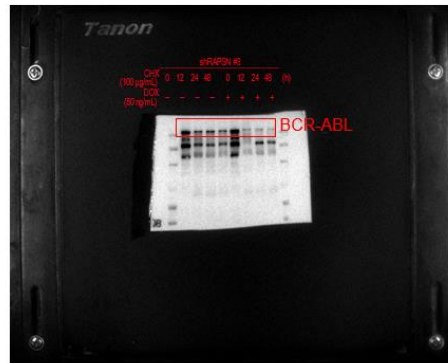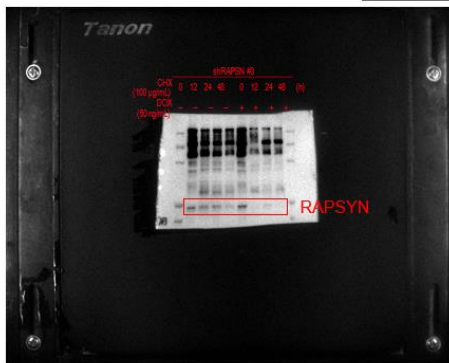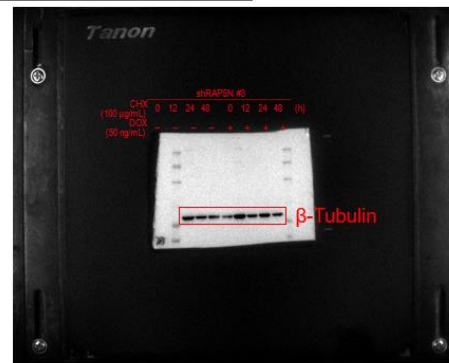

Supplement: fig3-data6 [file elife-88375-fig3-data6-v1.zip]

D

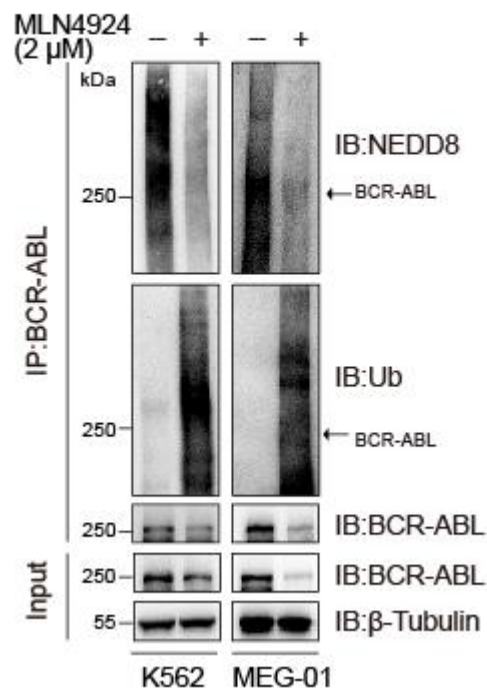

K562

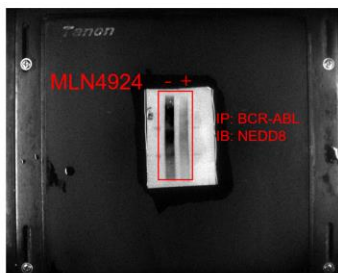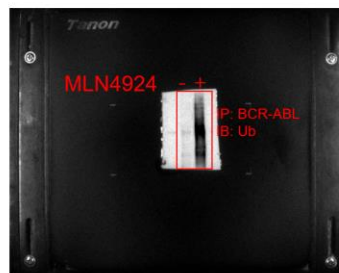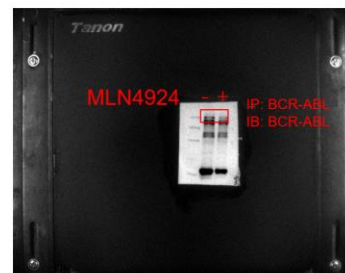

Input

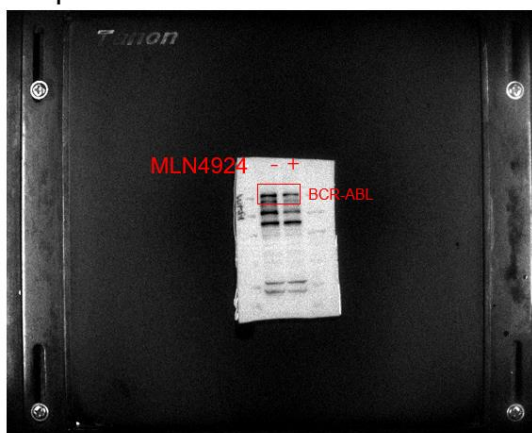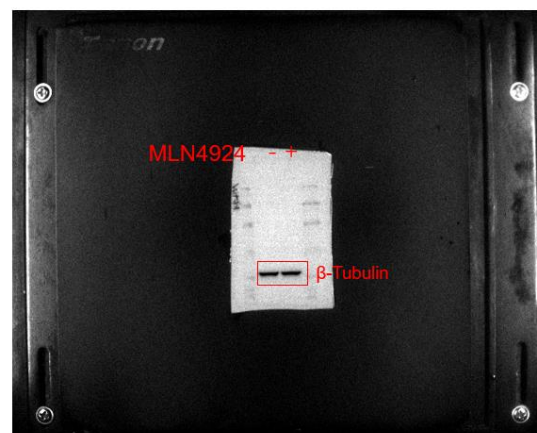

MEG-01

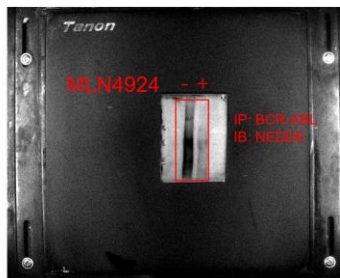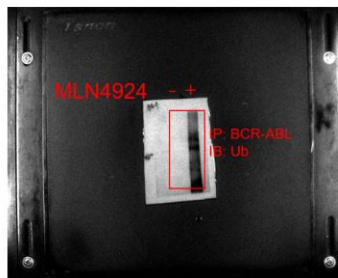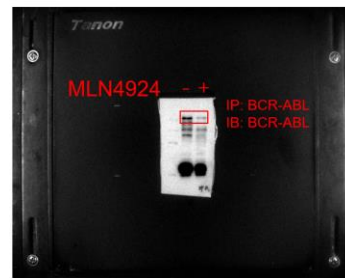

Input

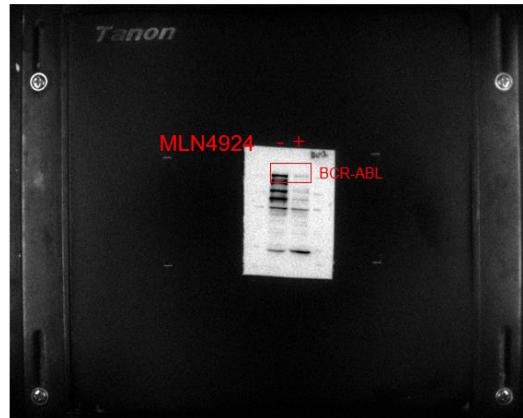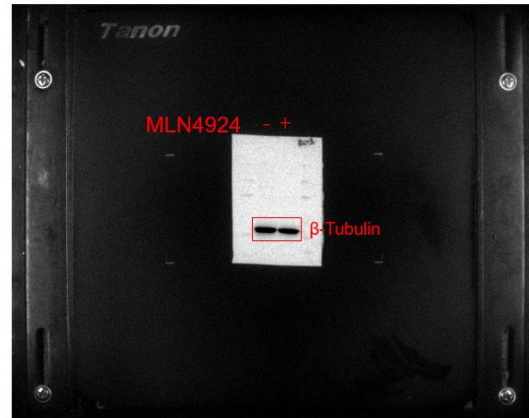

Supplement: fig3-data8 [file elife-88375-fig3-data8-v1.zip]

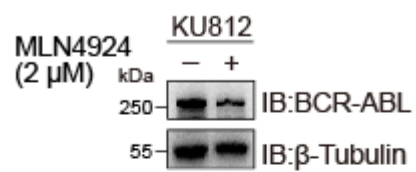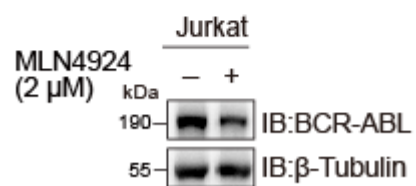

KU812

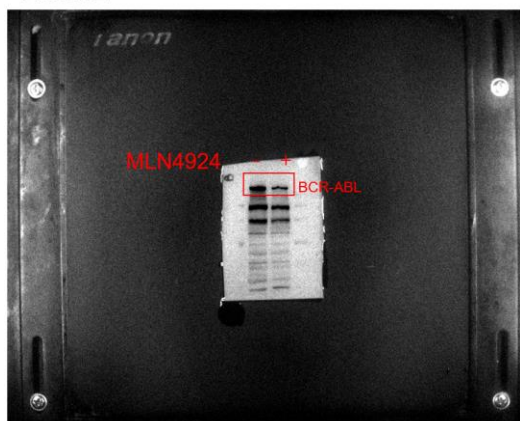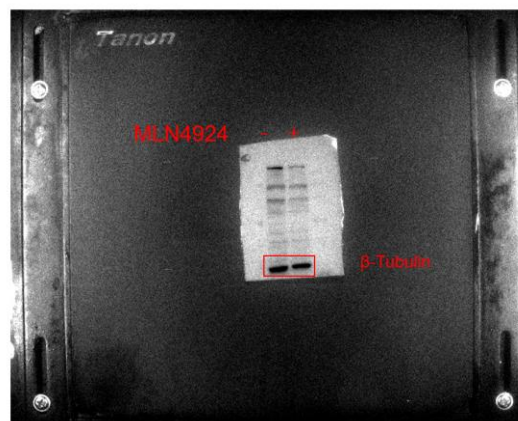

Jurkat

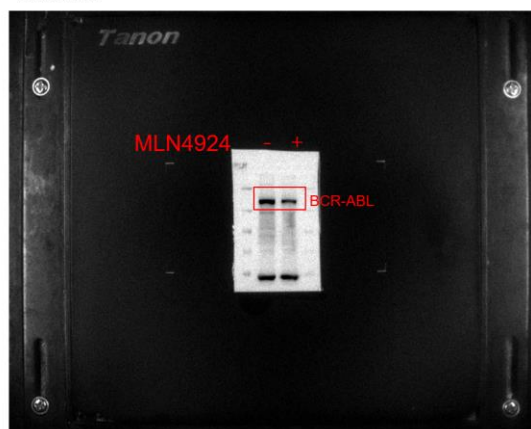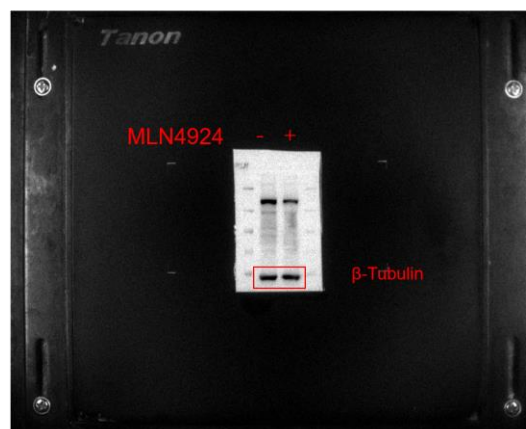

Supplement: fig3-figsupp1-data2 [file elife-88375-fig3-figsupp1-data2-v1.zip]

E

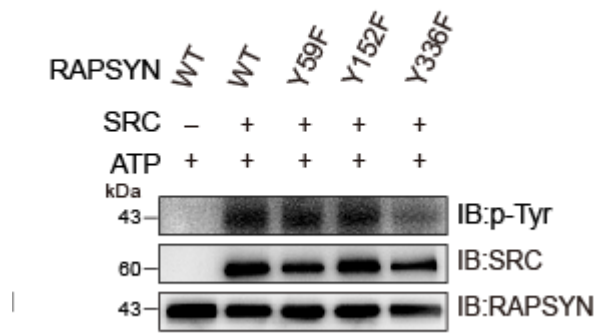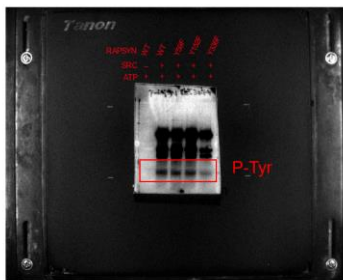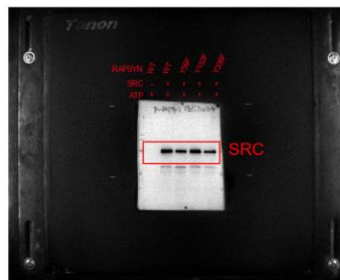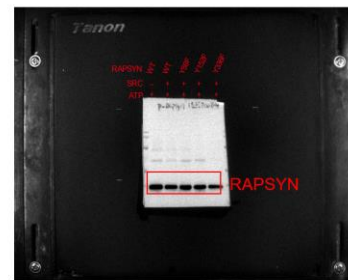

Supplement: fig4-data10 [file elife-88375-fig4-data10-v1.zip]

K562

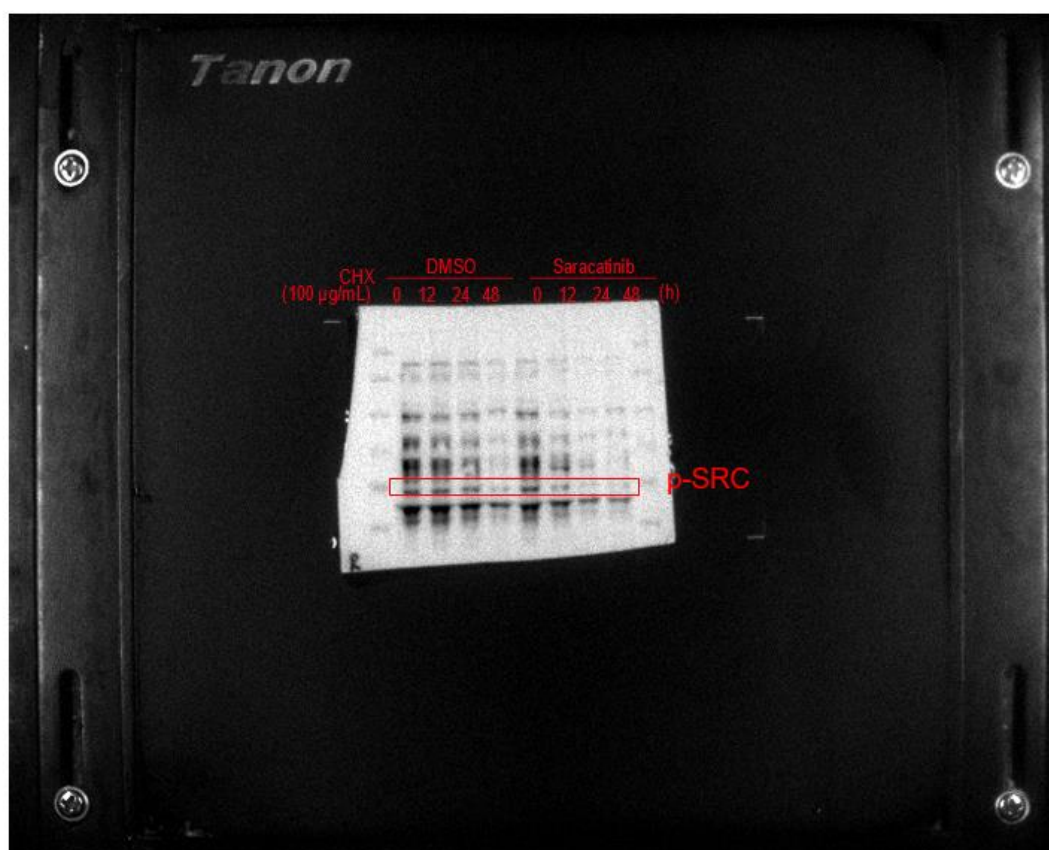

K562

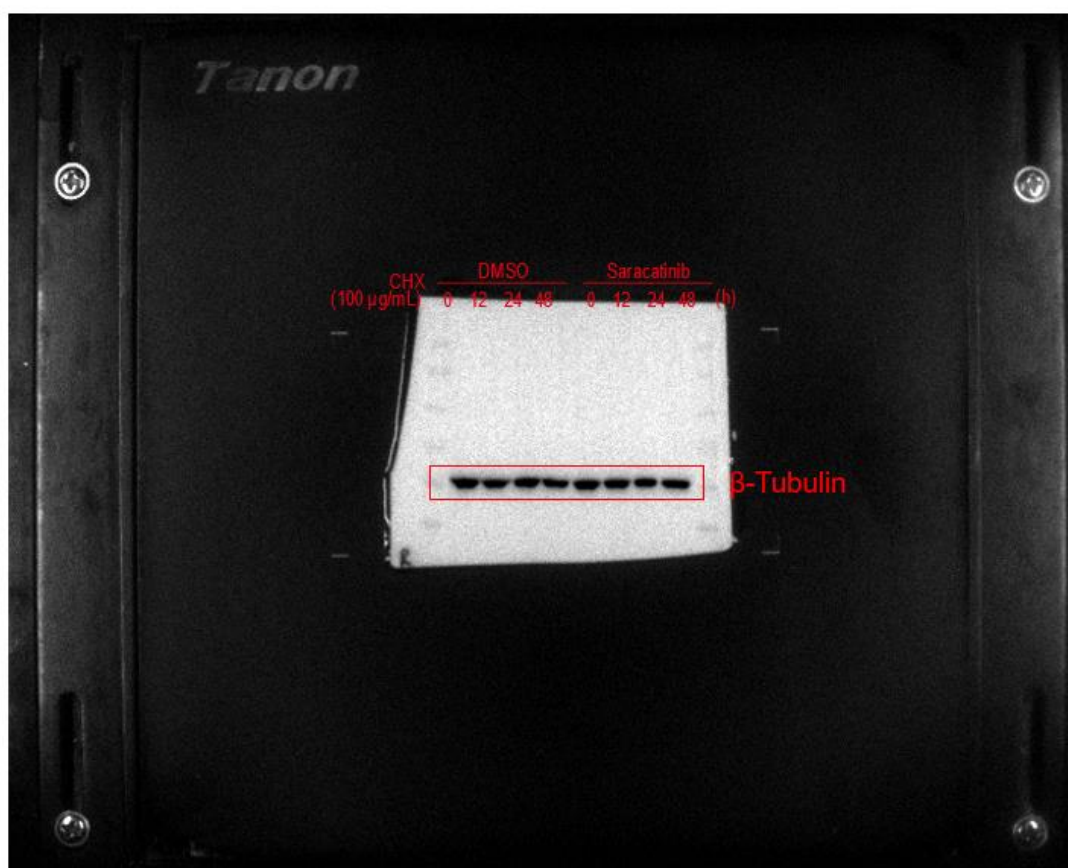

MEG-01

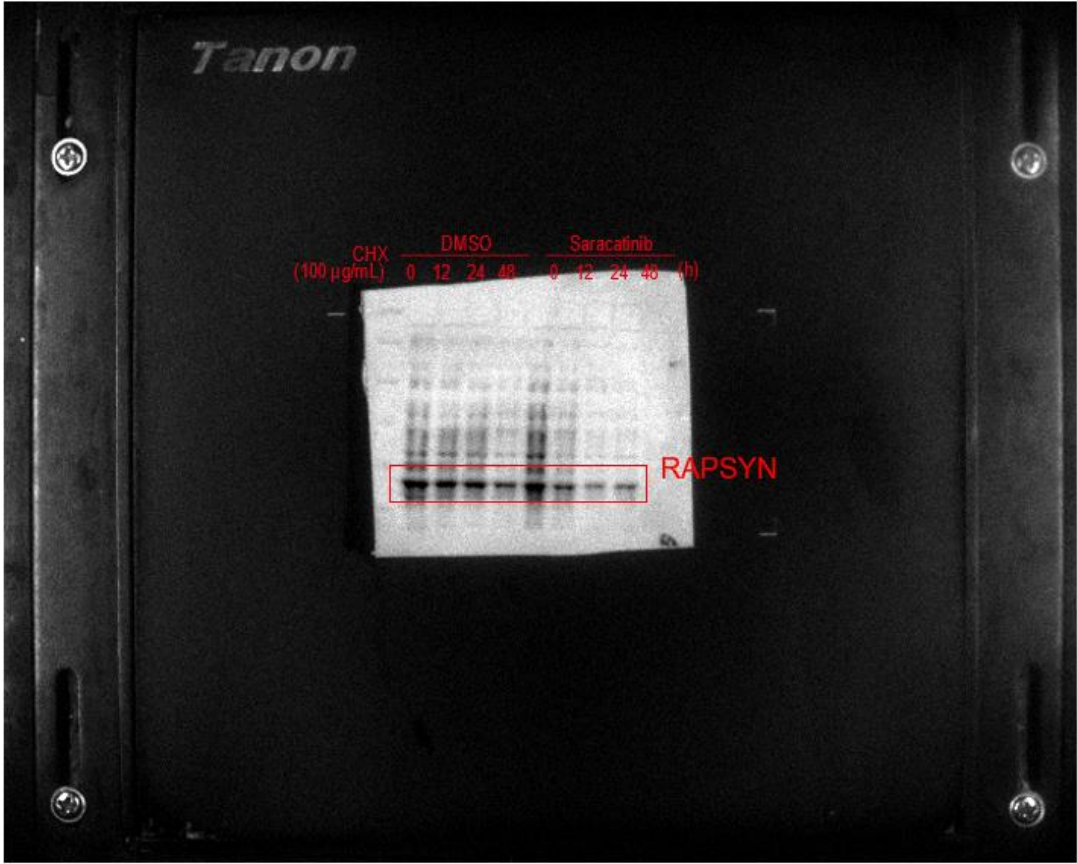

MEG-01

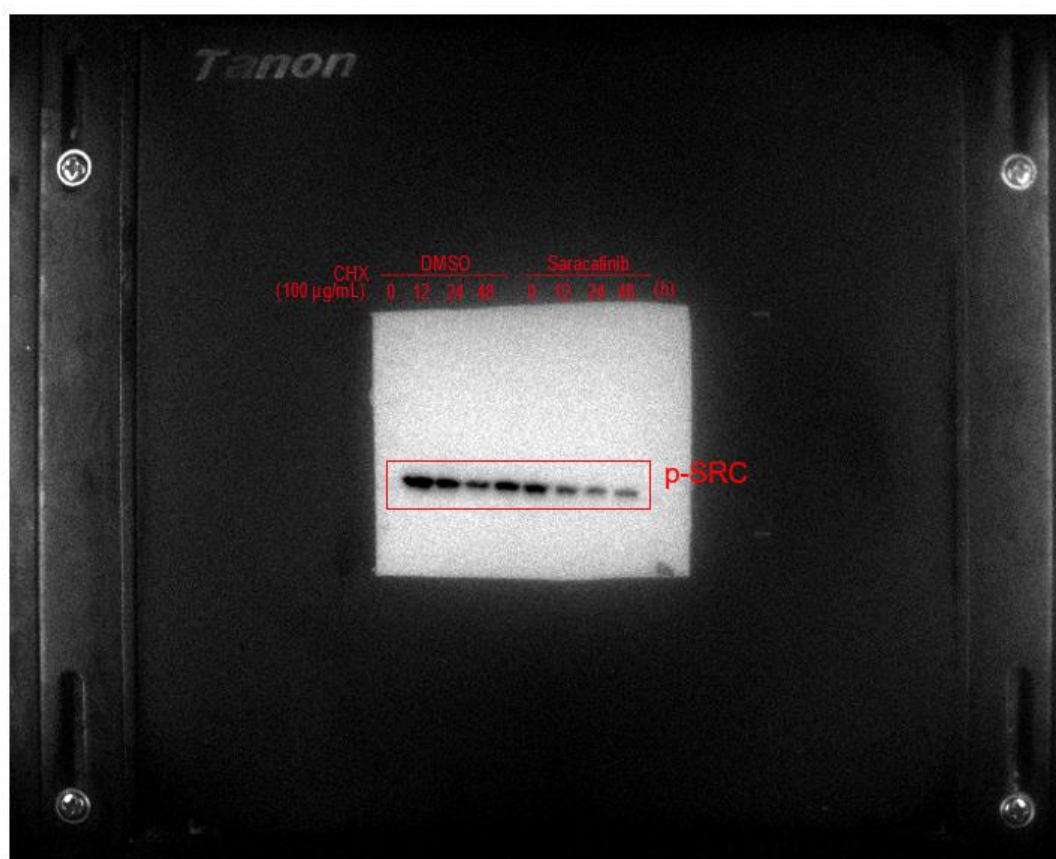

MEG-01

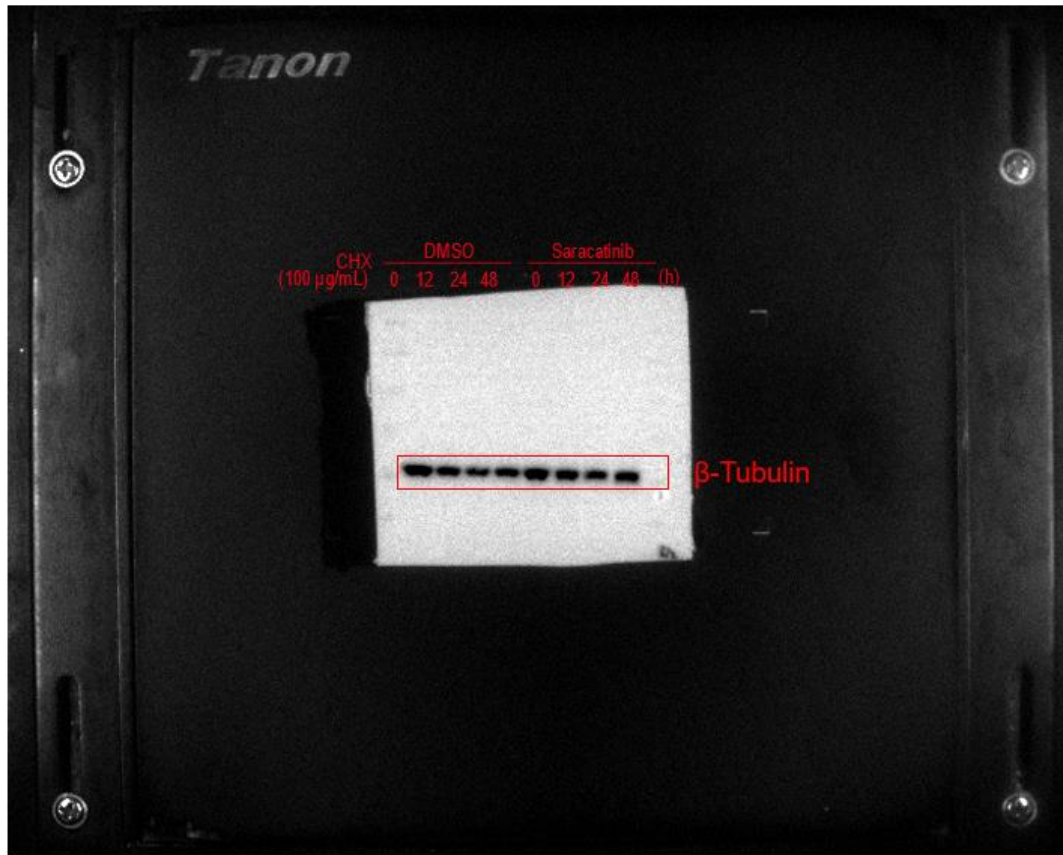

Supplement: fig4-data12 [file elife-88375-fig4-data12-v1.zip]

G

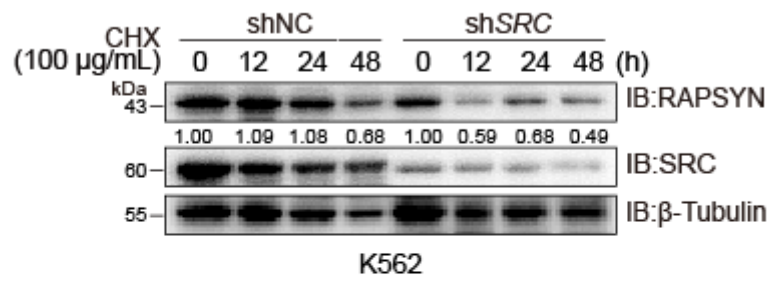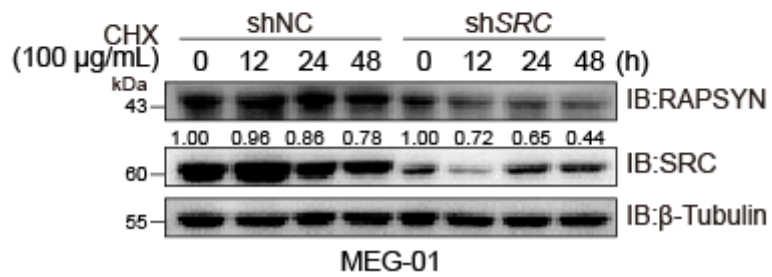

K562

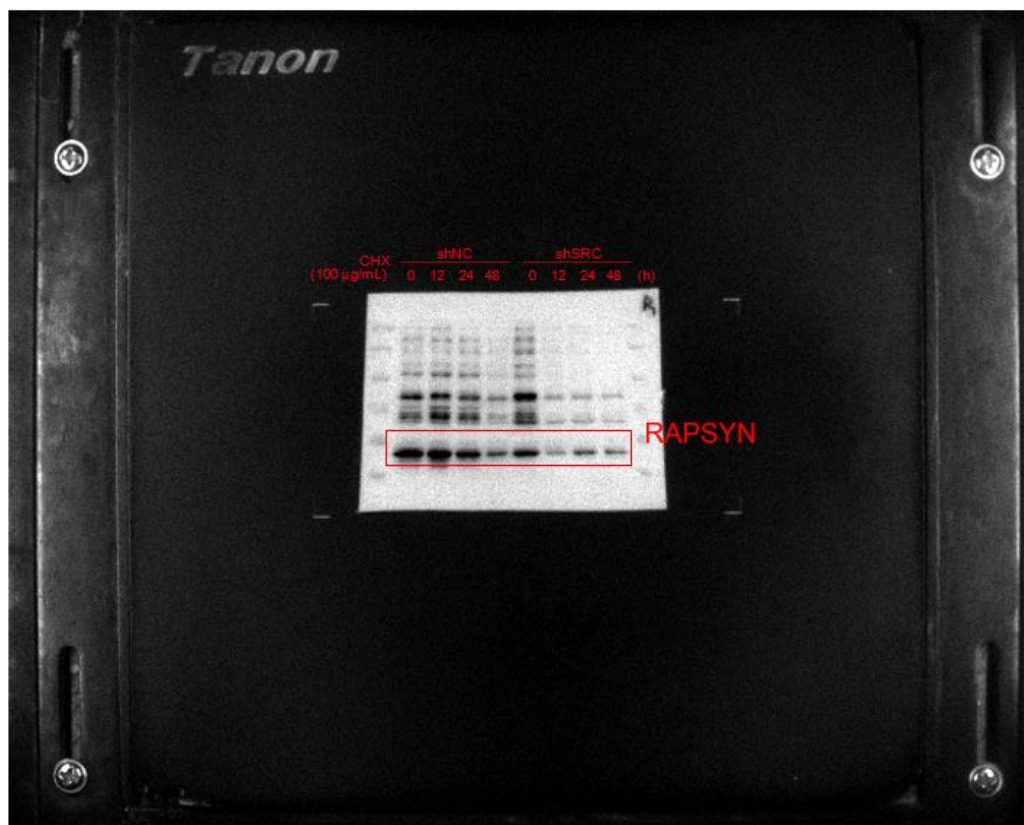

K562

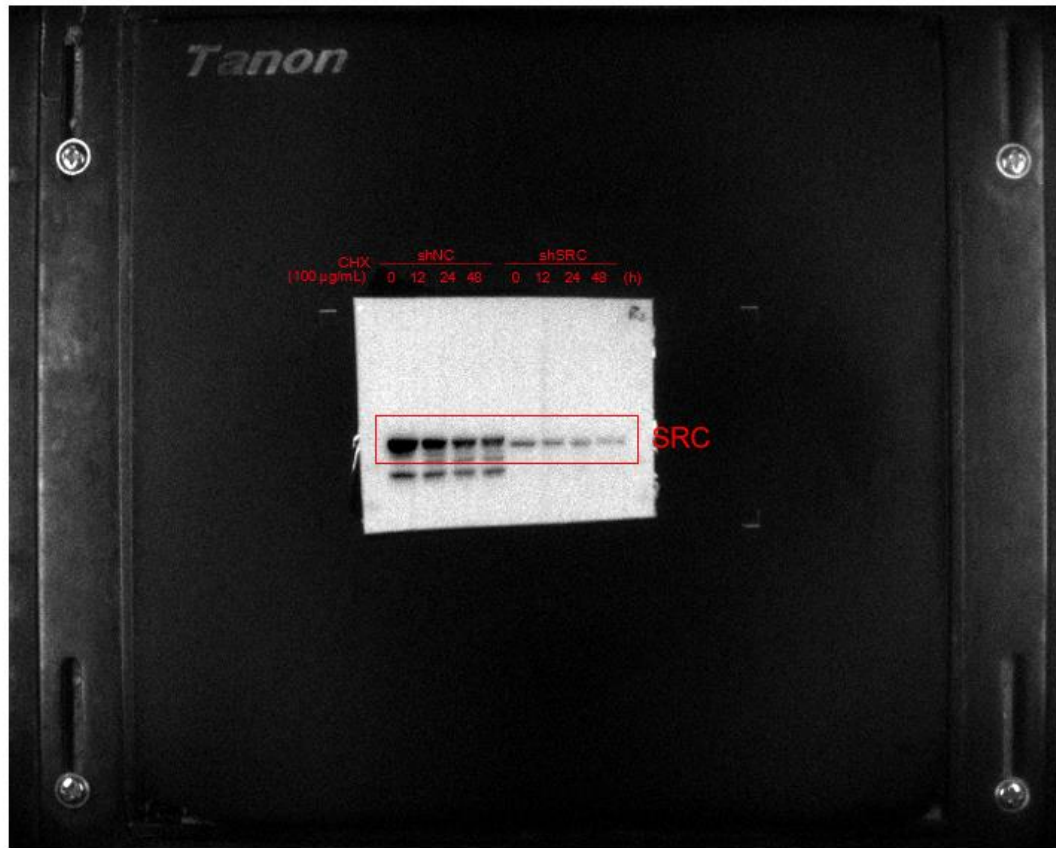

K562

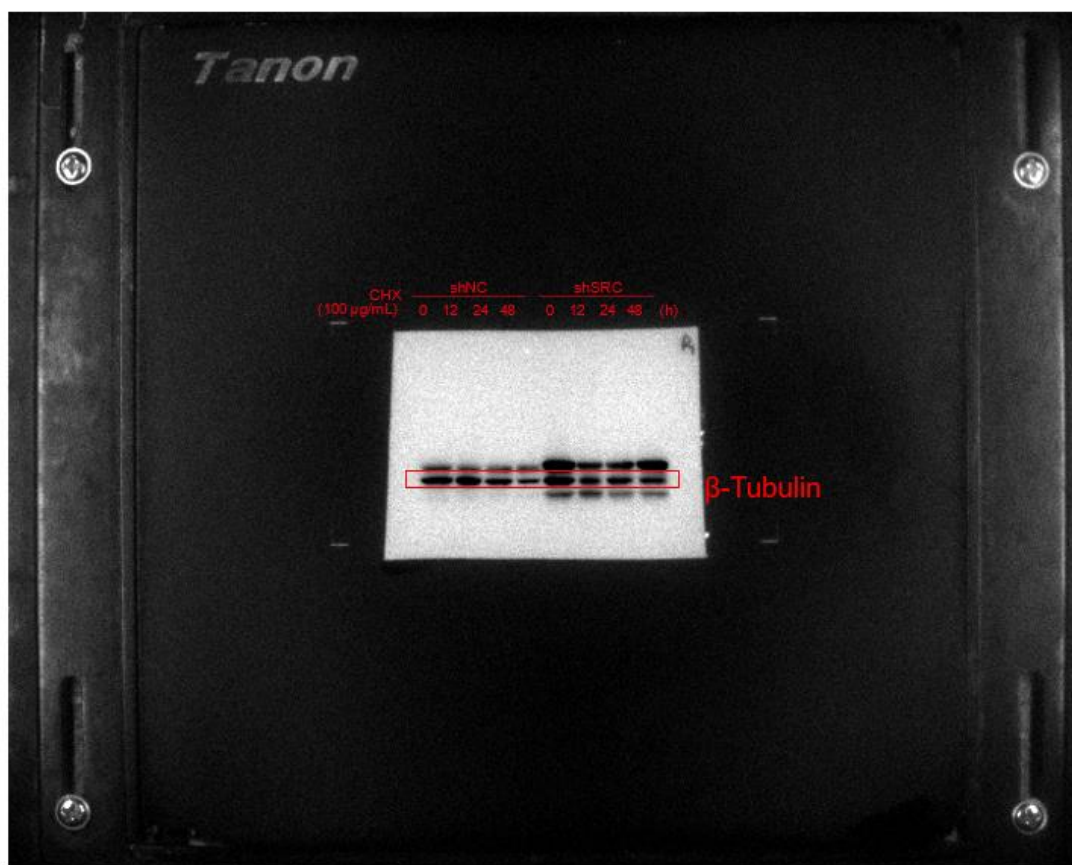

MEG-01

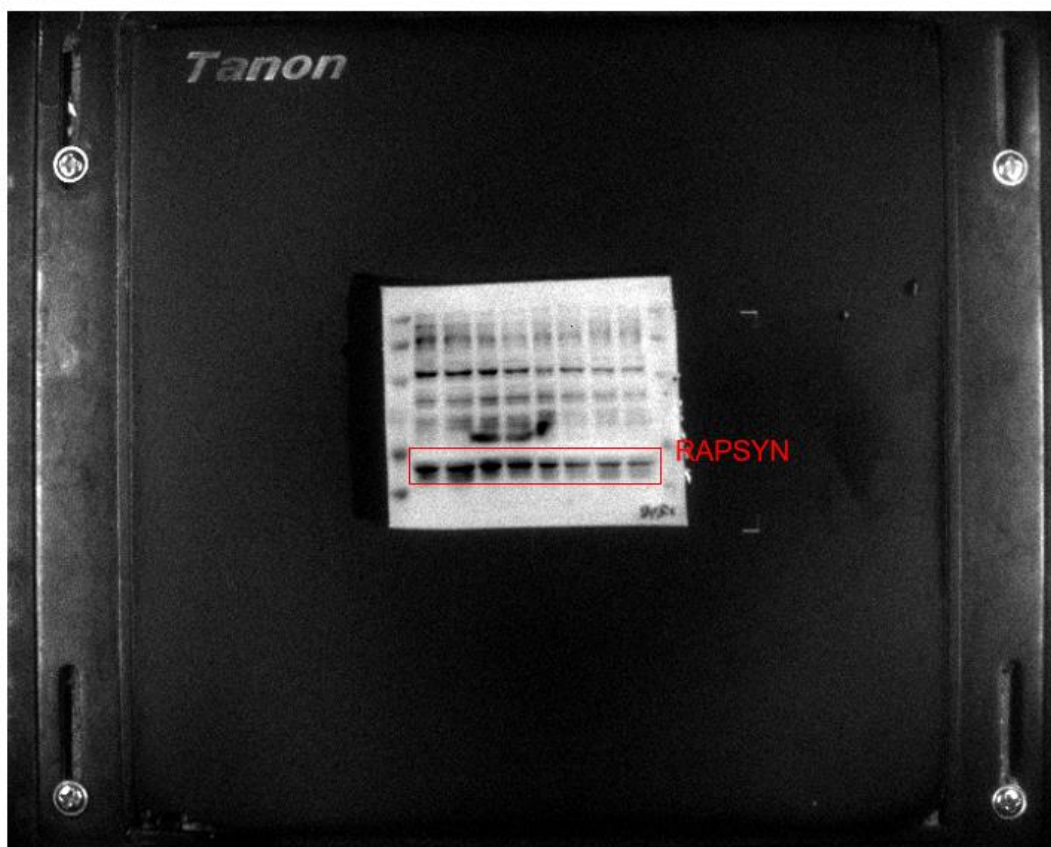

MEG-01

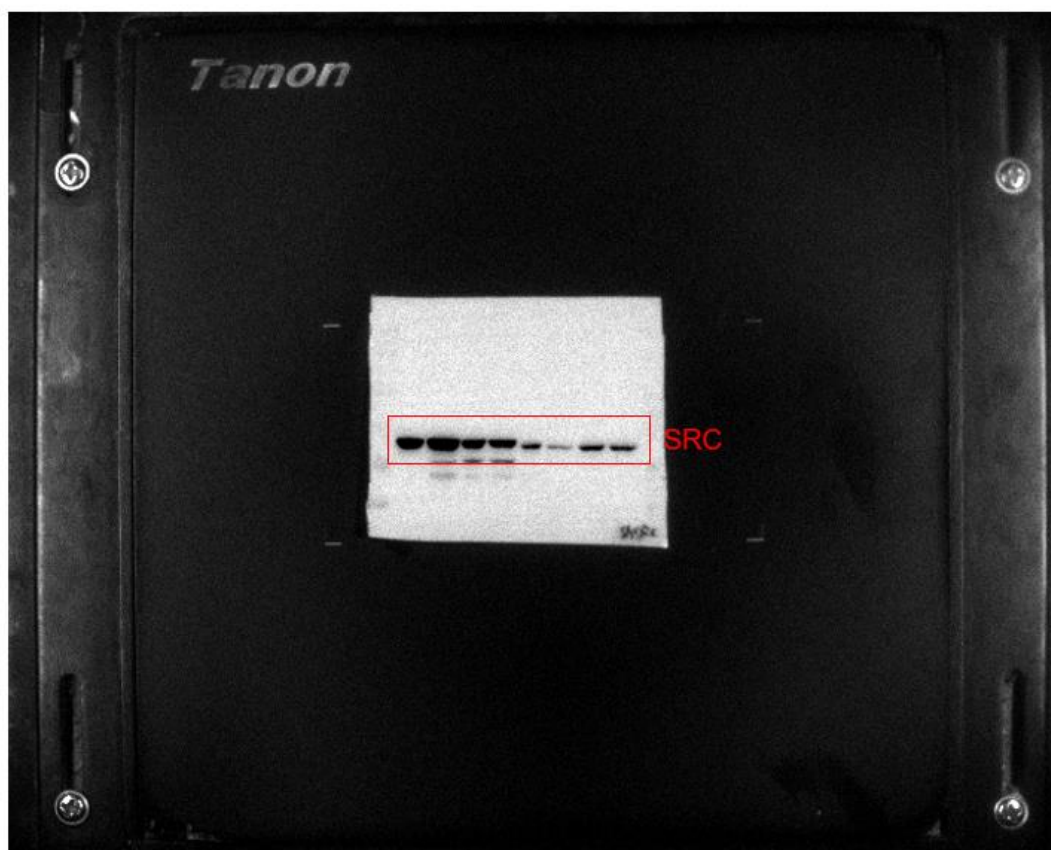



MEG-01

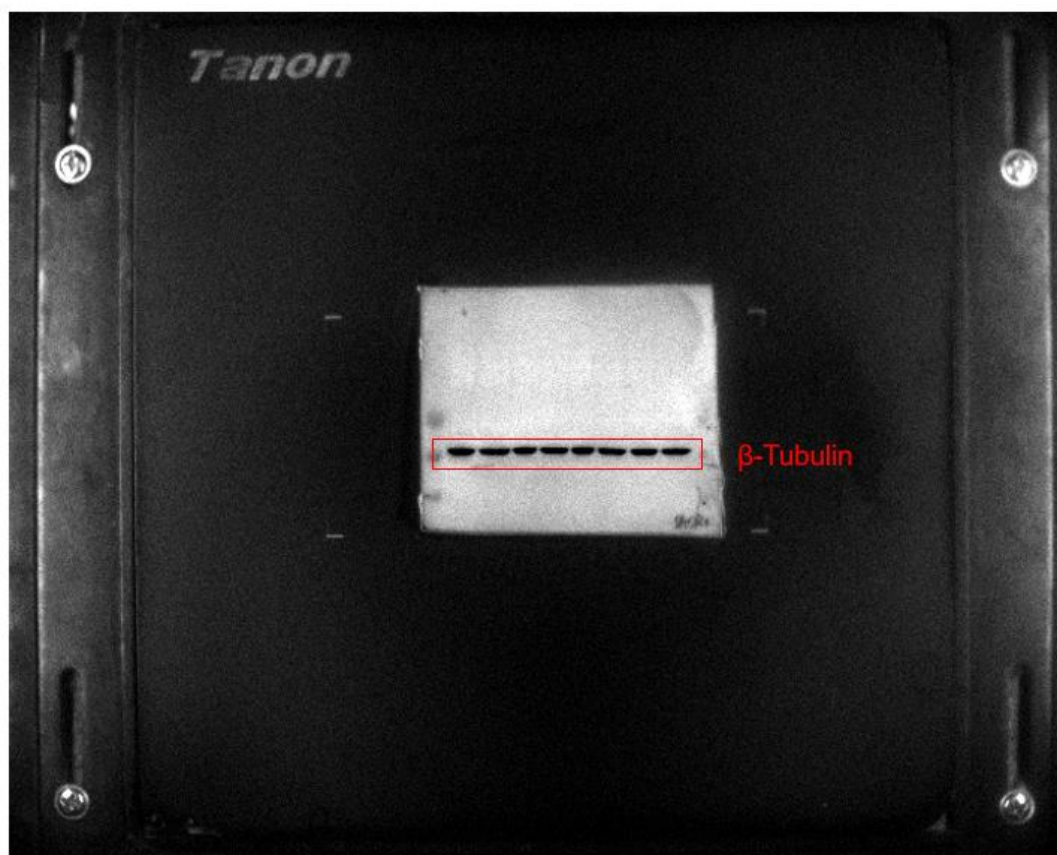

Supplement: fig4-data14 [file elife-88375-fig4-data14-v1.zip]

H

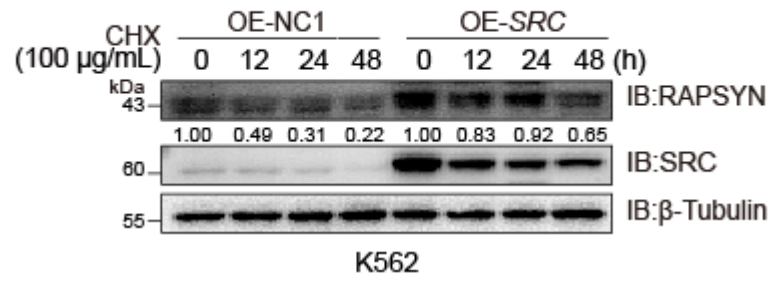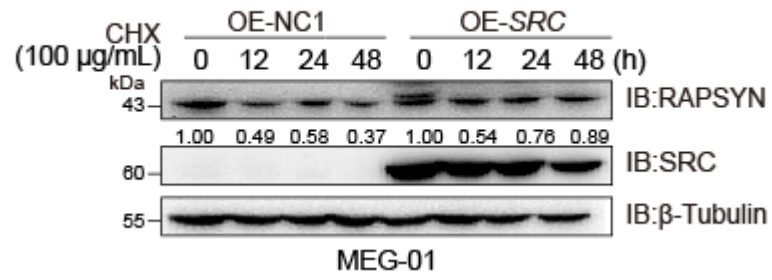

K562

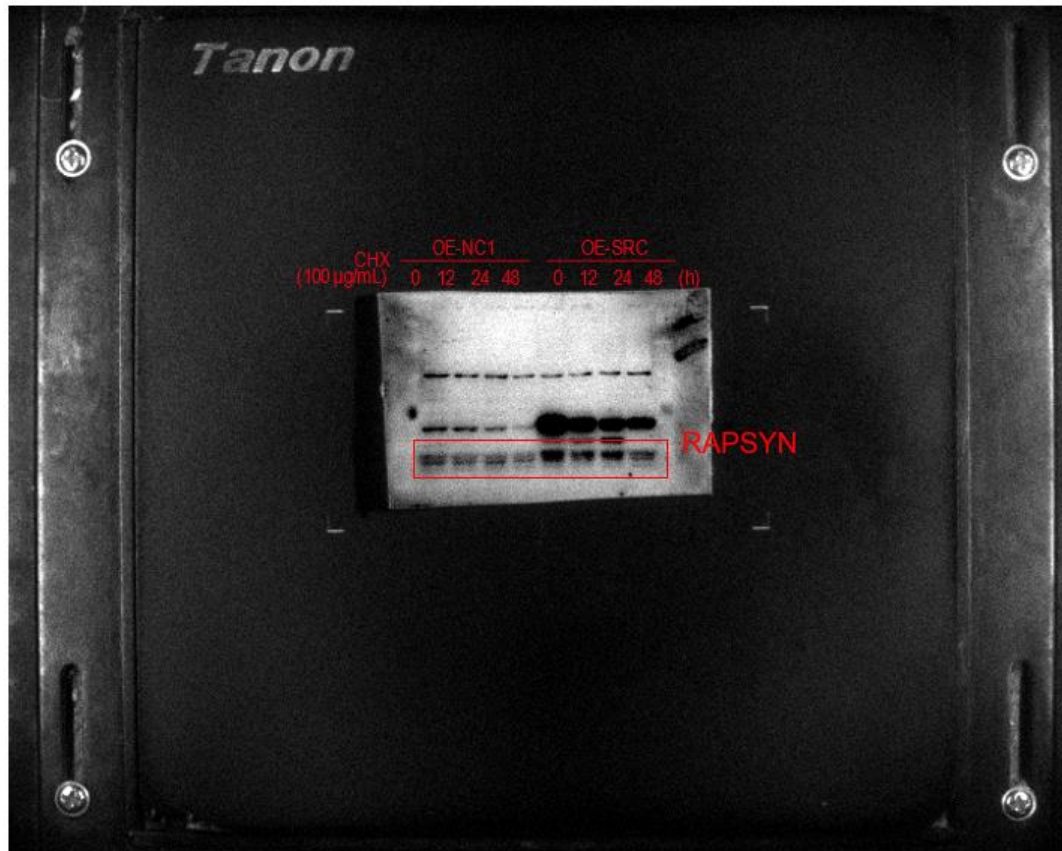

K562

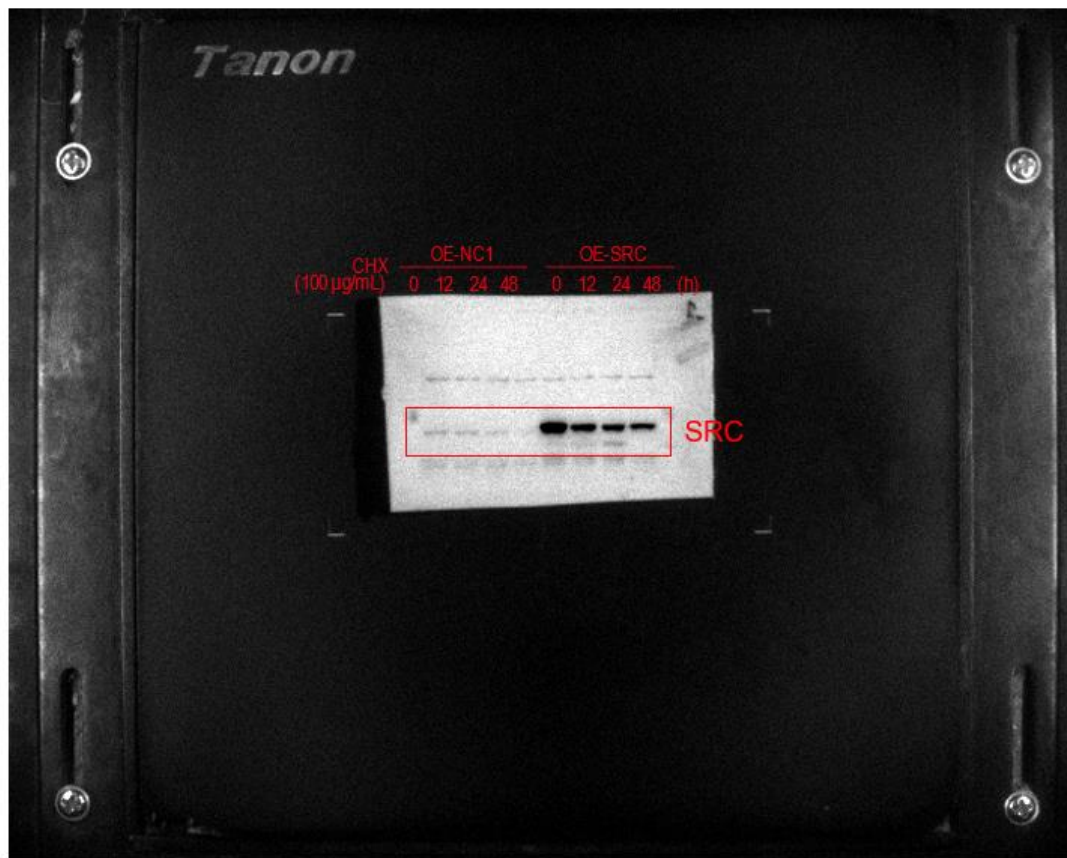

K562

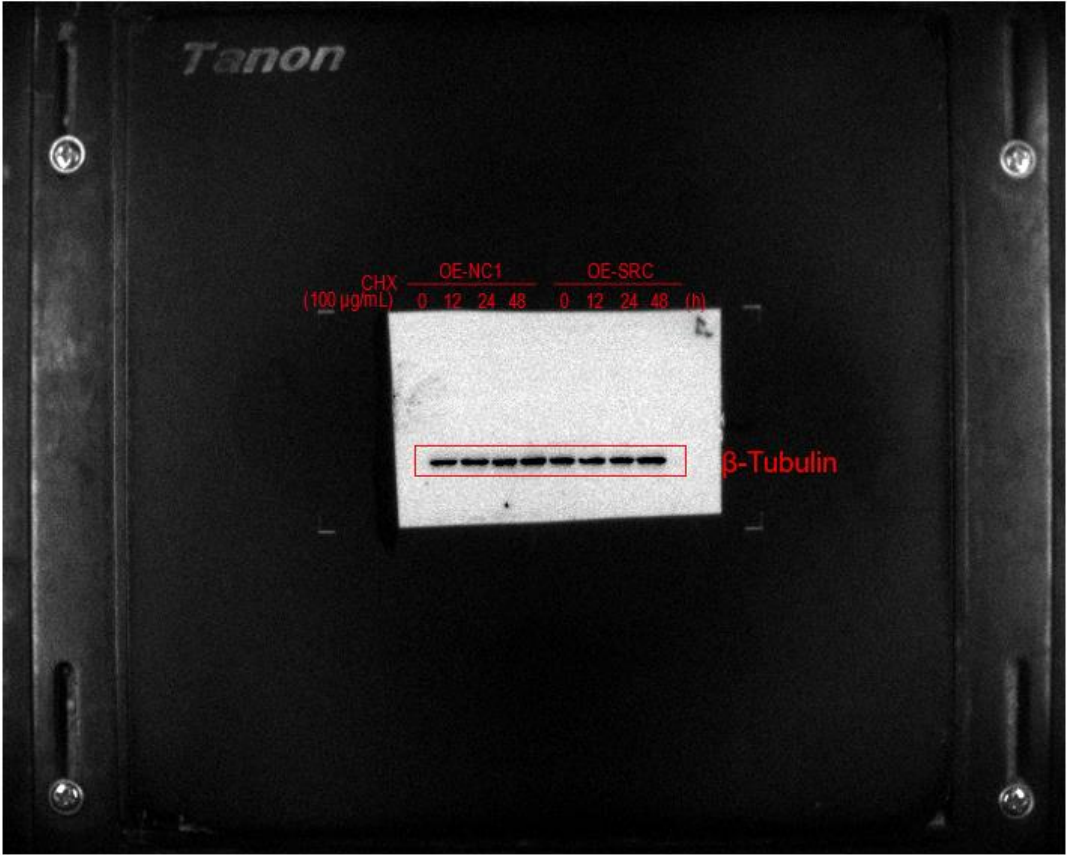

MEG-01

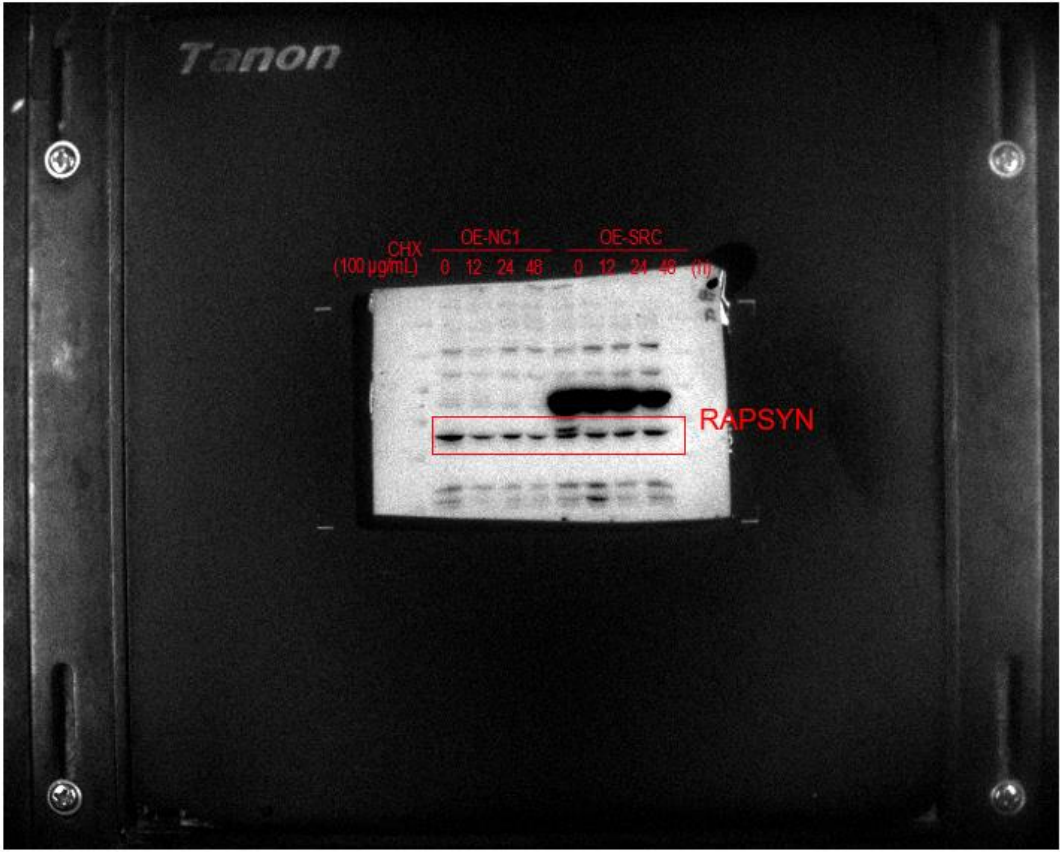

MEG-01

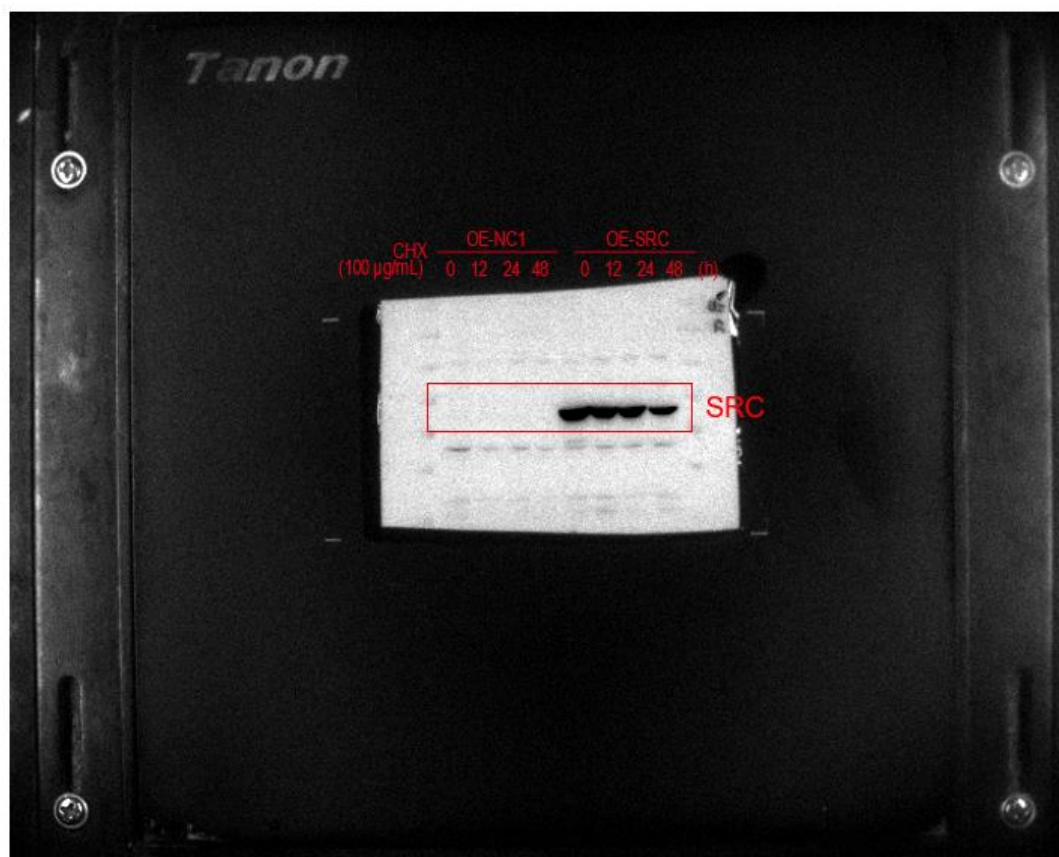



MEG-01

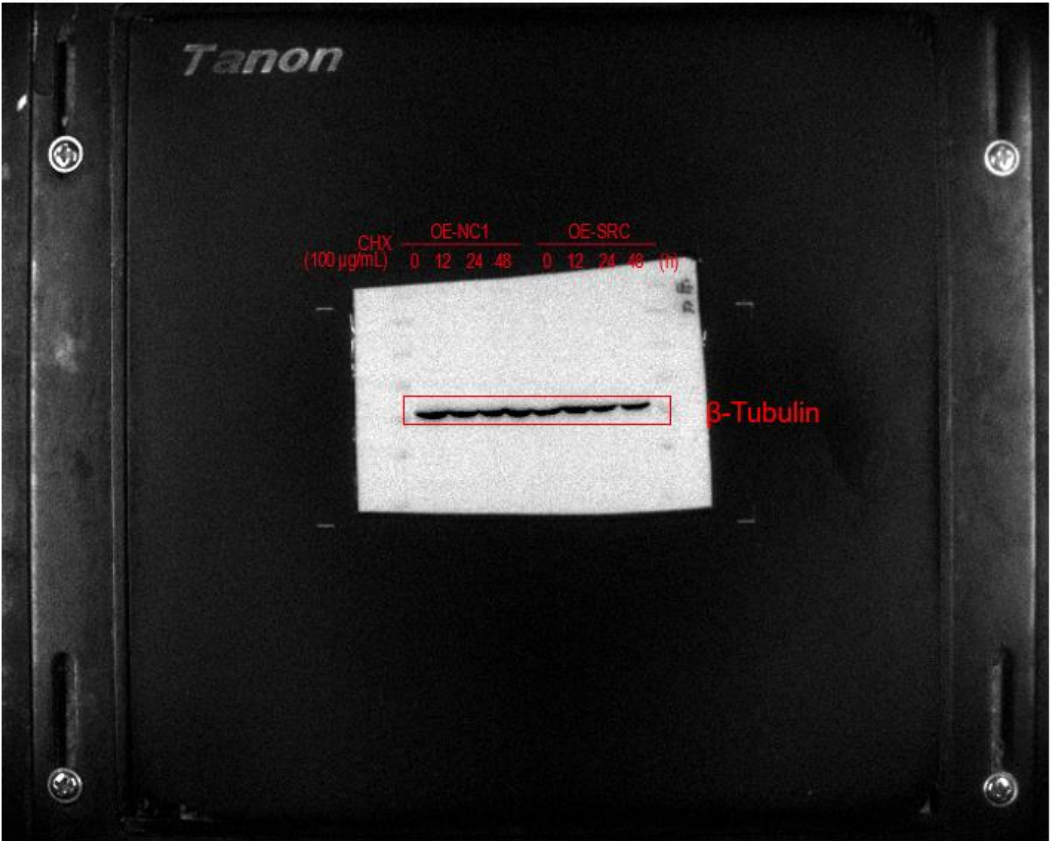

Supplement: fig4-data16 [file elife-88375-fig4-data16-v1.zip]

I

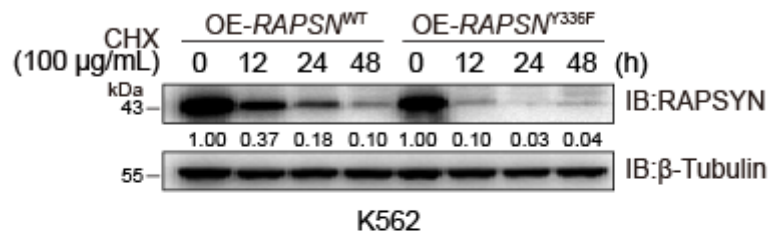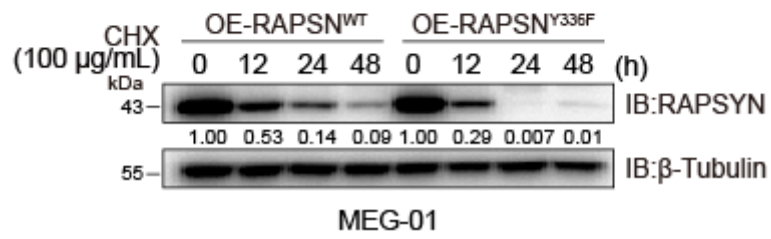

K562

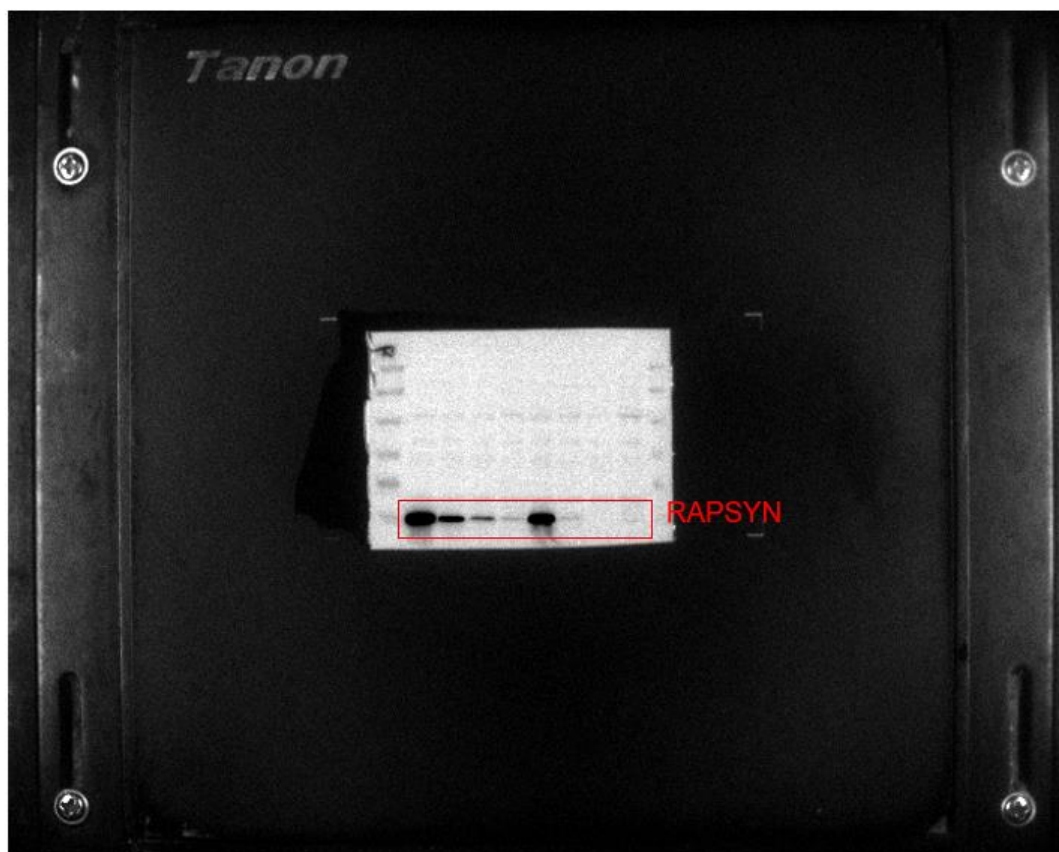

K562

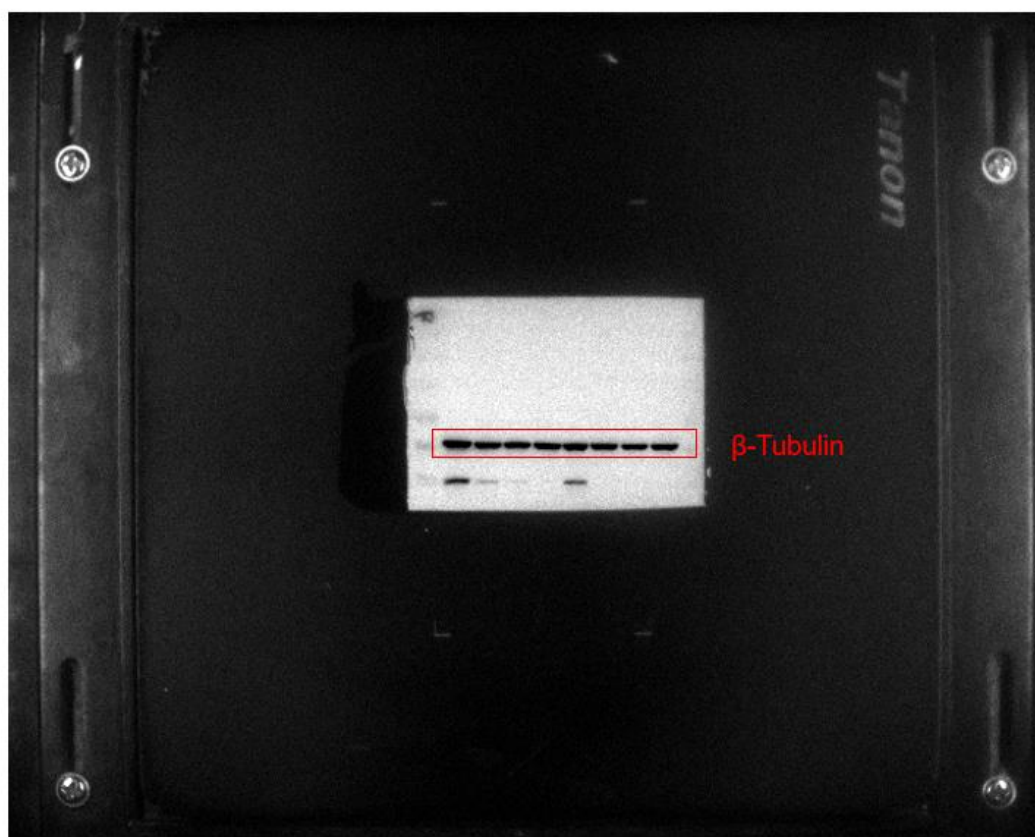

MEG-01

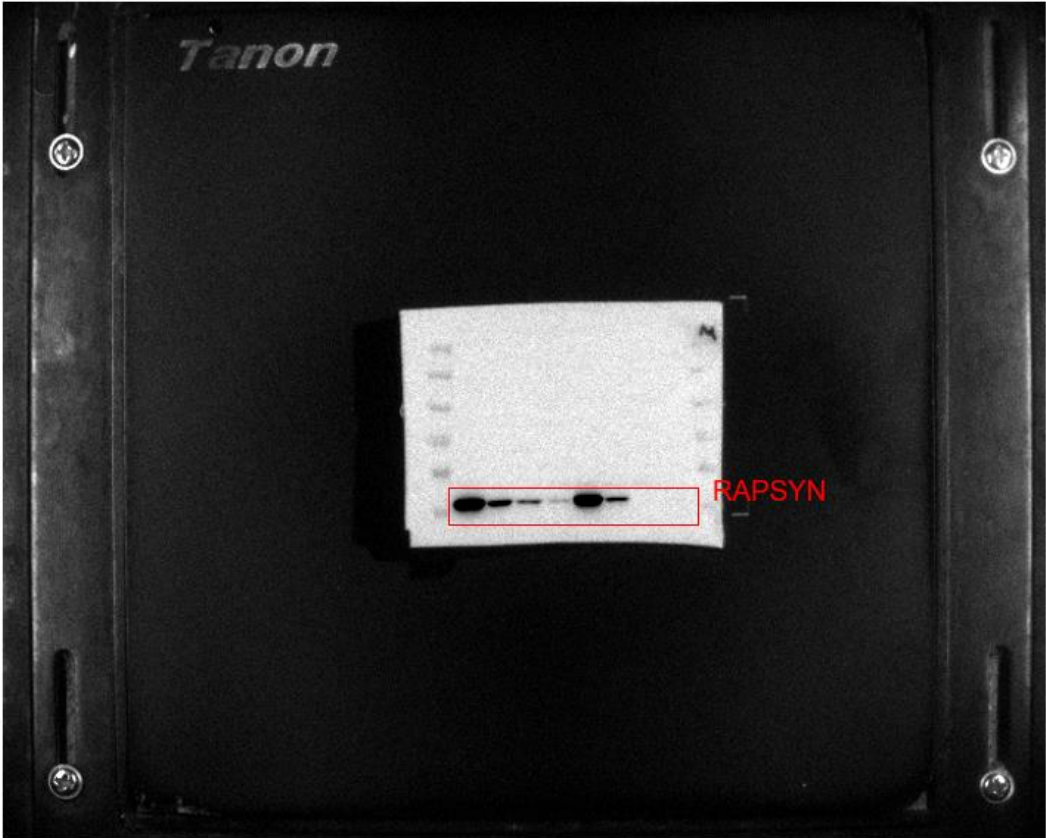

MEG-01

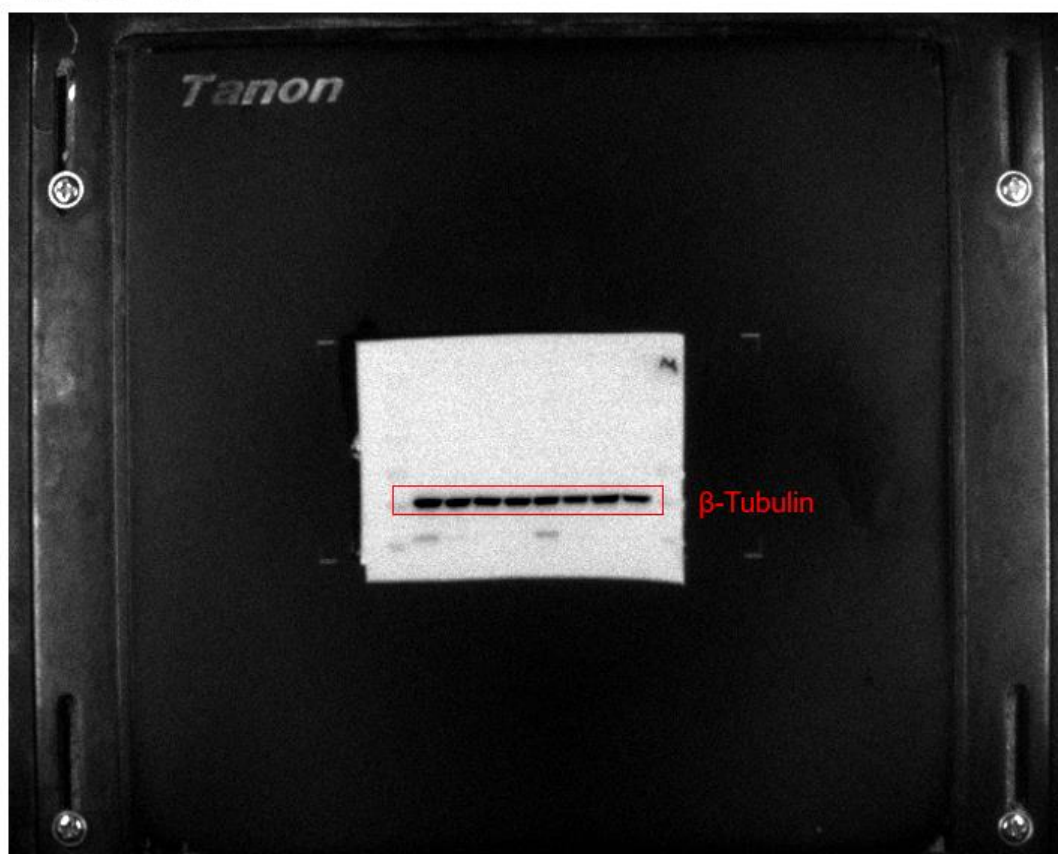

Supplement: fig4-data18 [file elife-88375-fig4-data18-v1.zip]

A

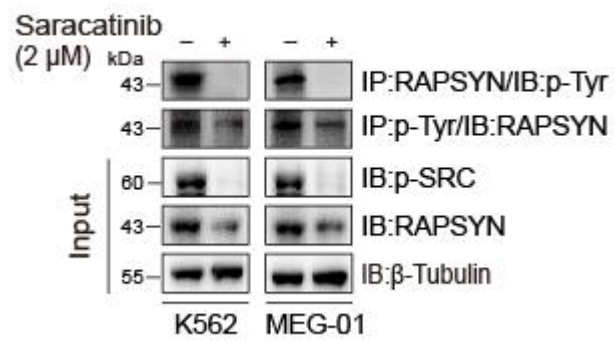

K562

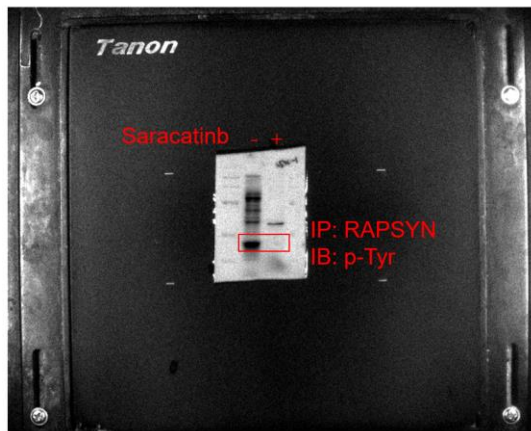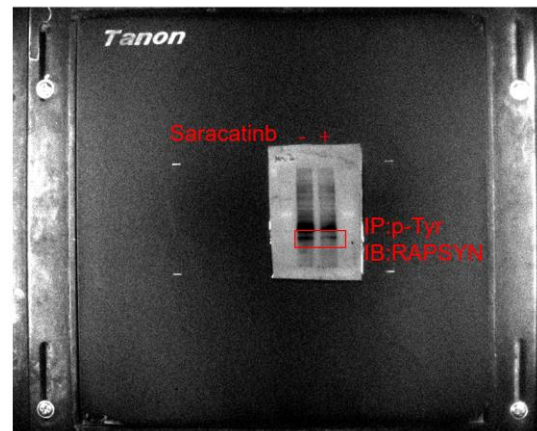

Input

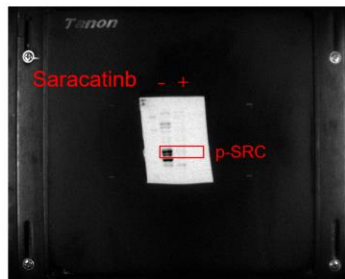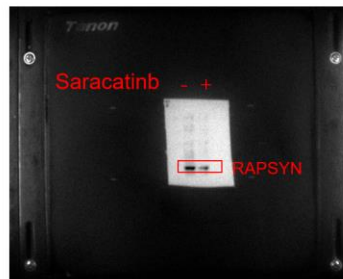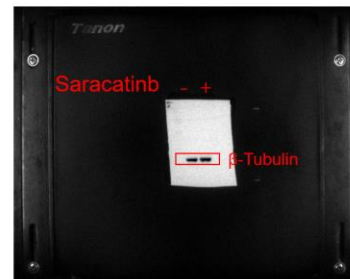

MEG-01

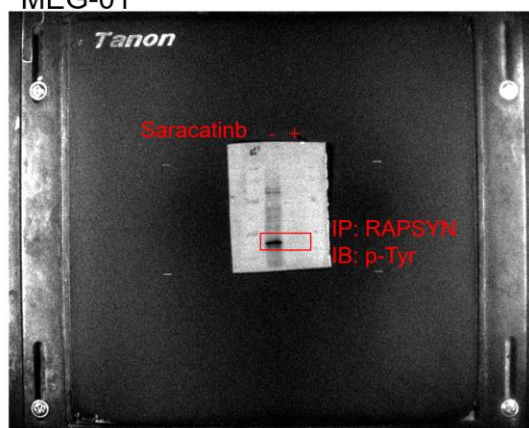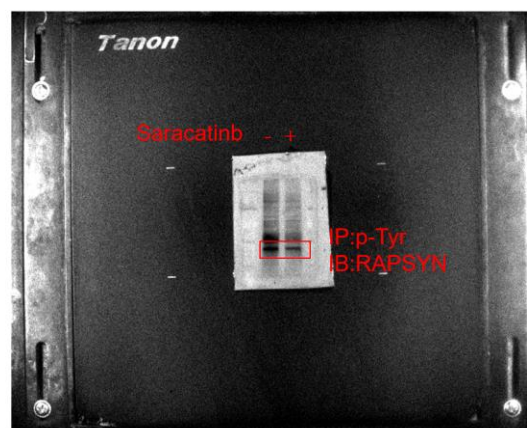

Input

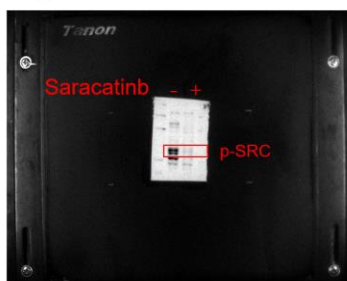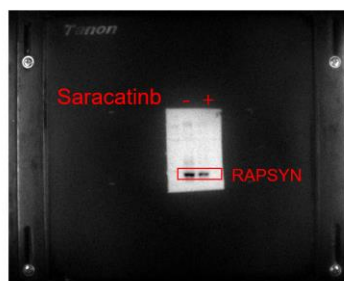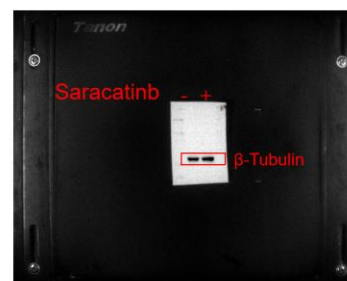

Supplement: fig4-data2 [file elife-88375-fig4-data2-v1.zip]

J

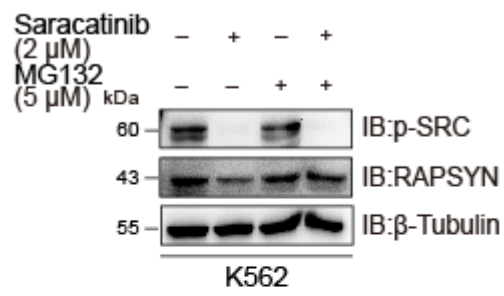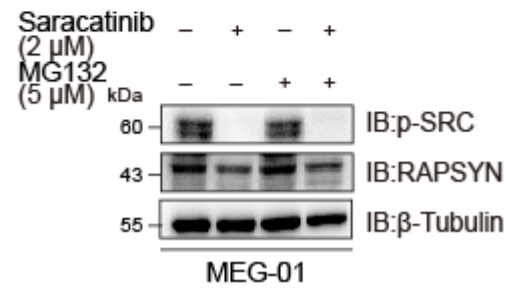

K562

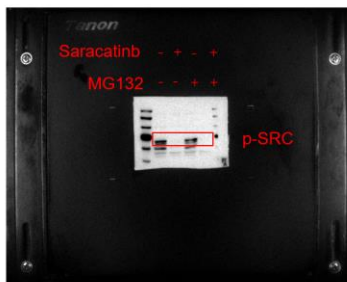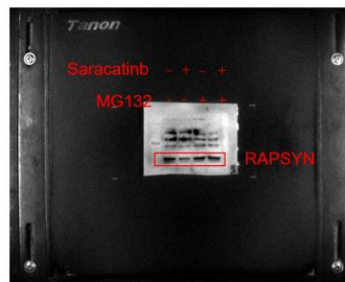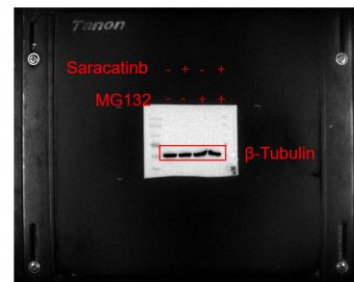

MEG-01

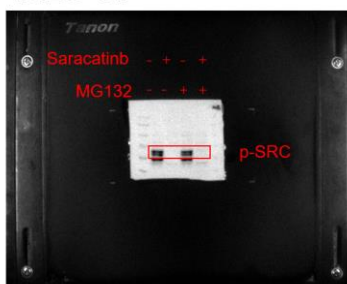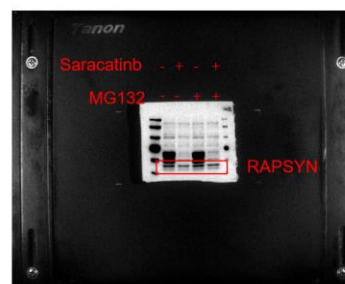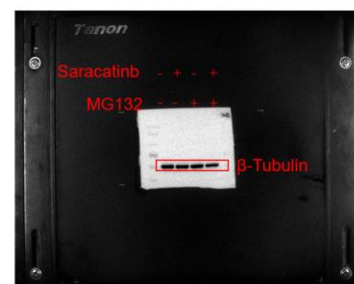

Supplement: fig4-data20 [file elife-88375-fig4-data20-v1.zip]

K

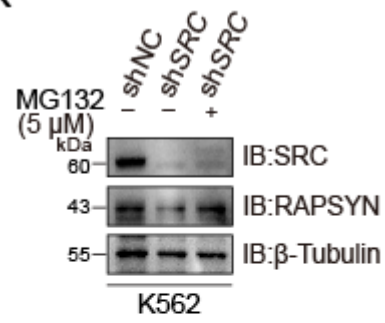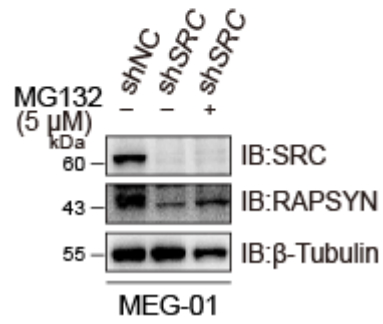

K562

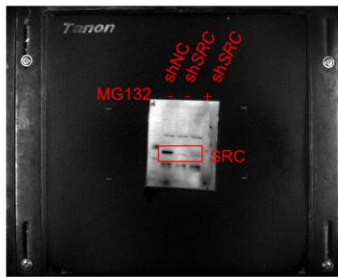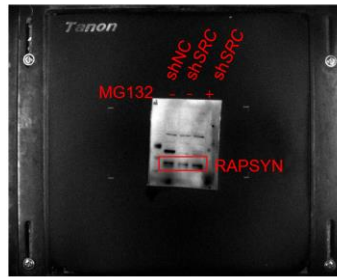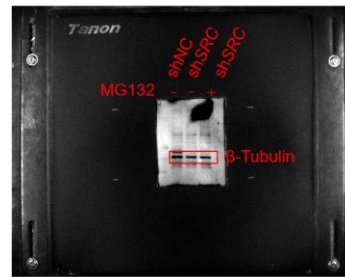

MEG-01

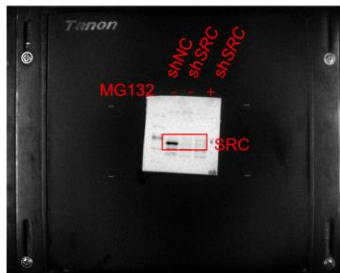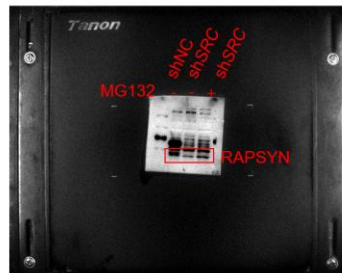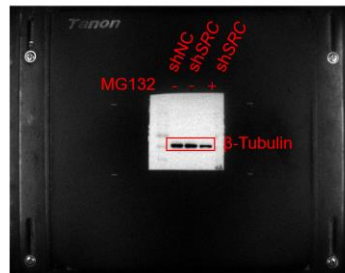

Supplement: fig4-data22 [file elife-88375-fig4-data22-v1.zip]

B

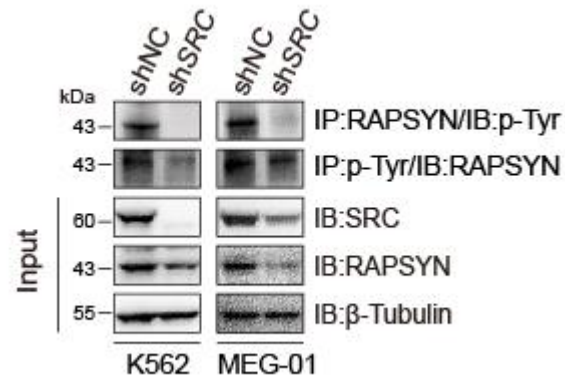

K562

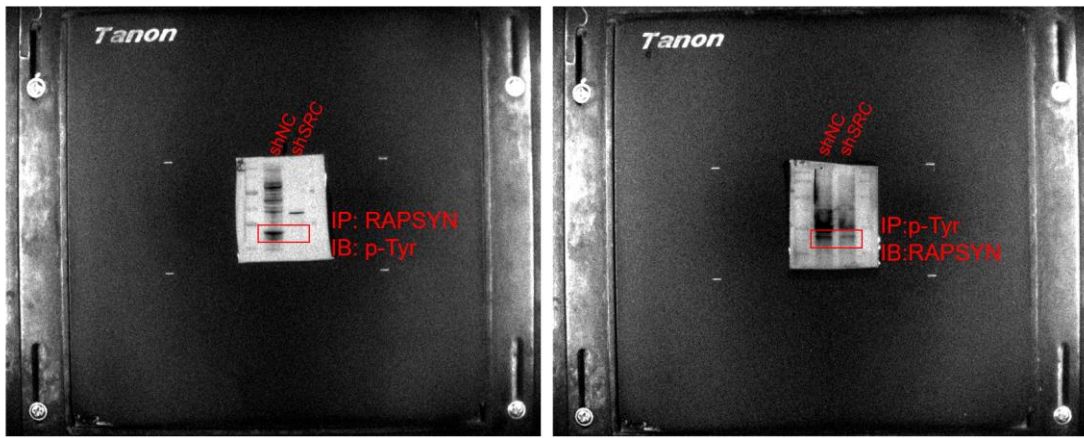

Input

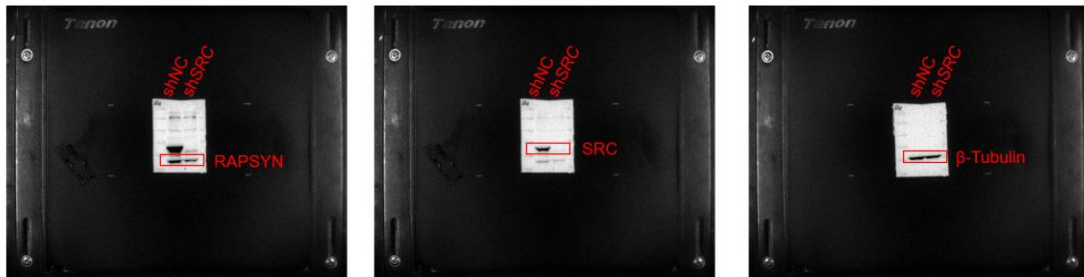

MEG-01

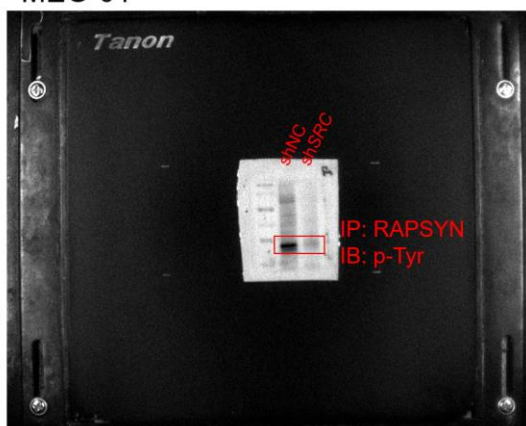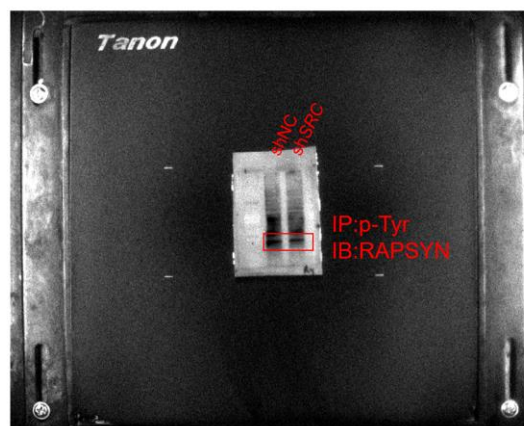

Input

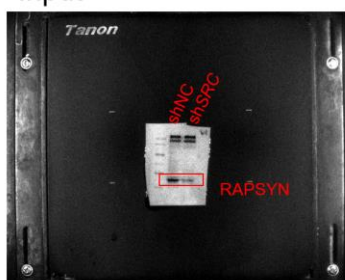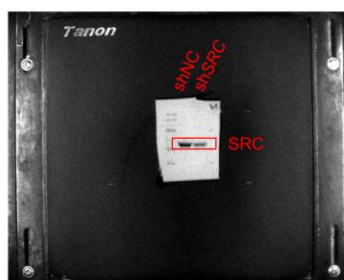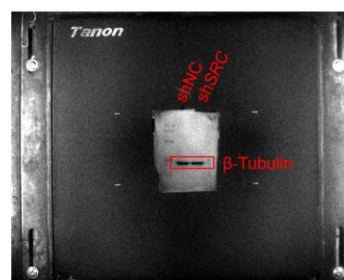

Supplement: fig4-data4 [file elife-88375-fig4-data4-v1.zip]

C

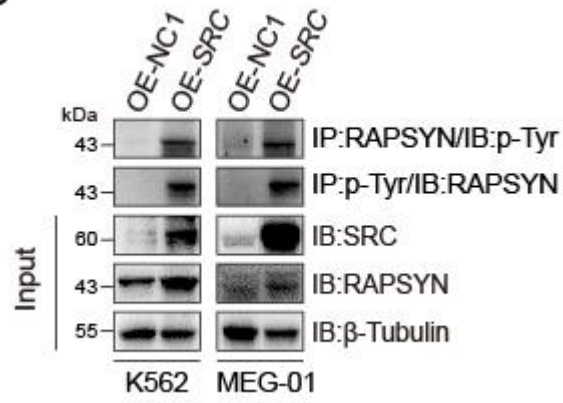

K562

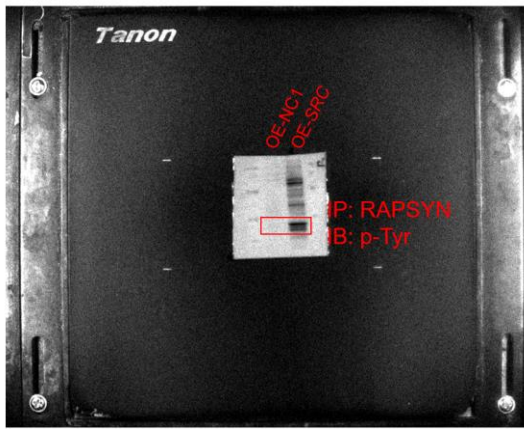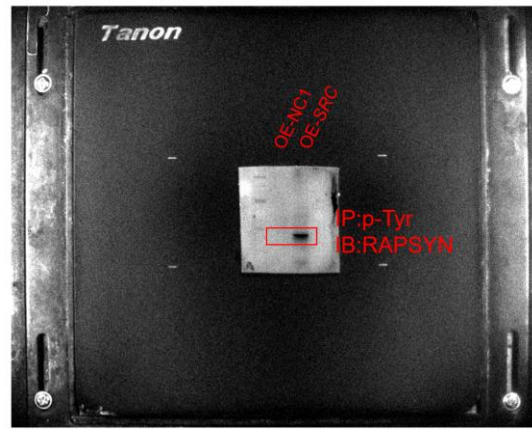

Input

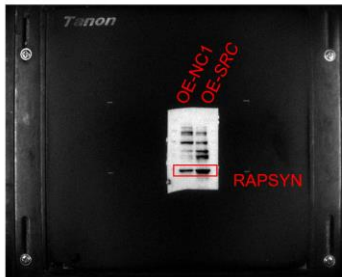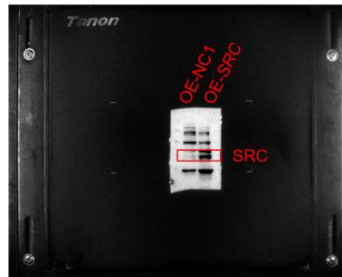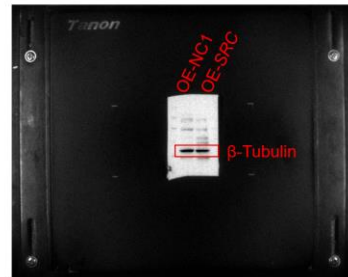

MEG-01

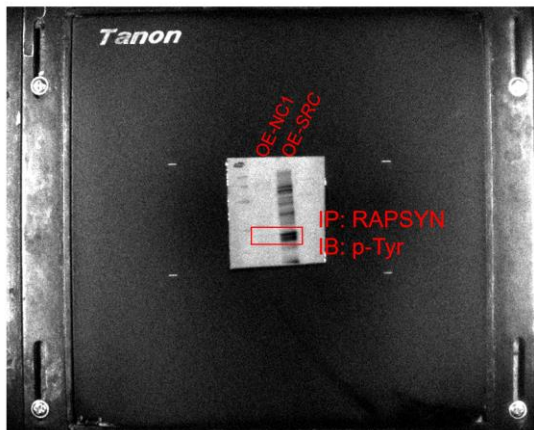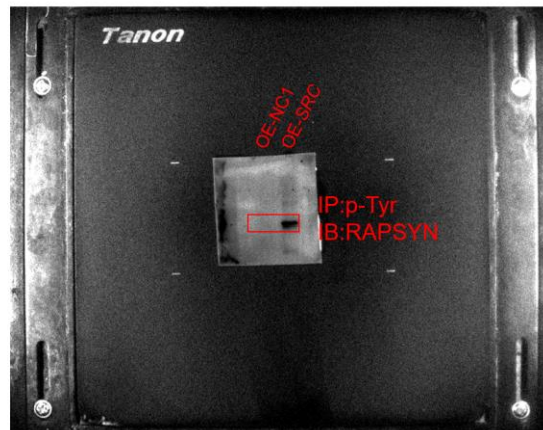

Input

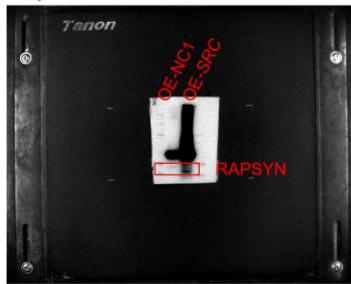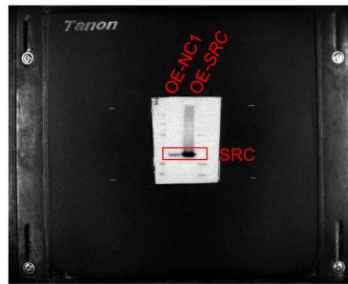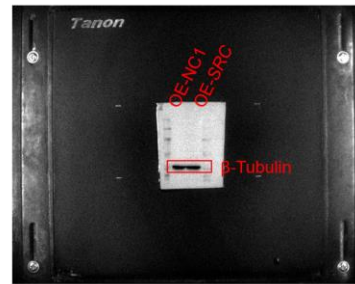

Supplement: fig4-data6 [file elife-88375-fig4-data6-v1.zip]

D

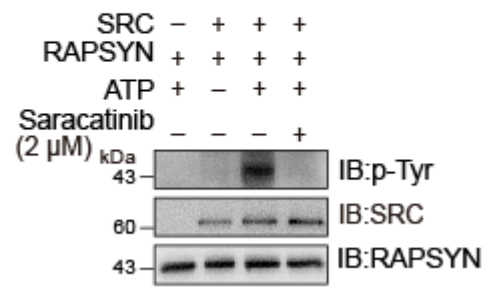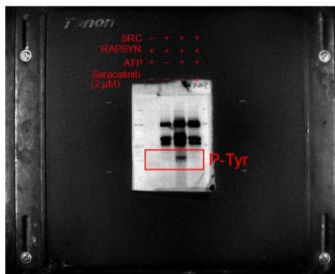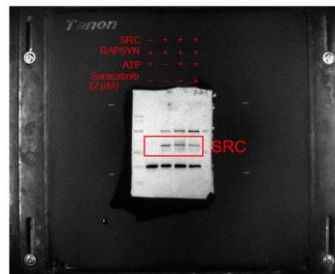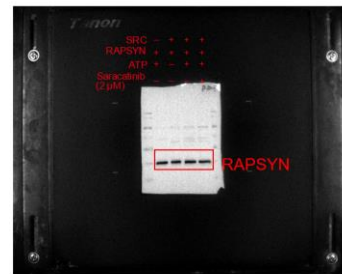

Supplement: fig4-data8 [file elife-88375-fig4-data8-v1.zip]

A

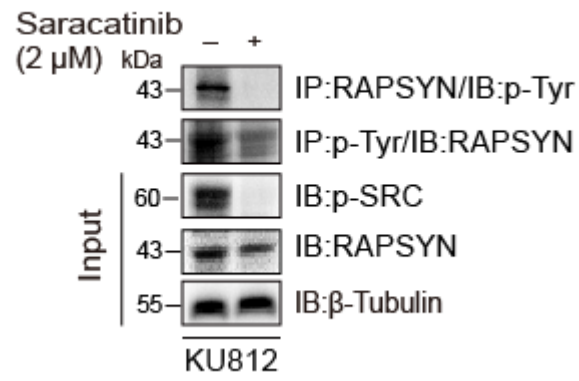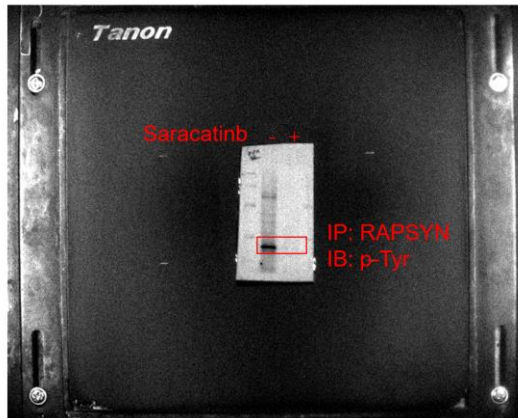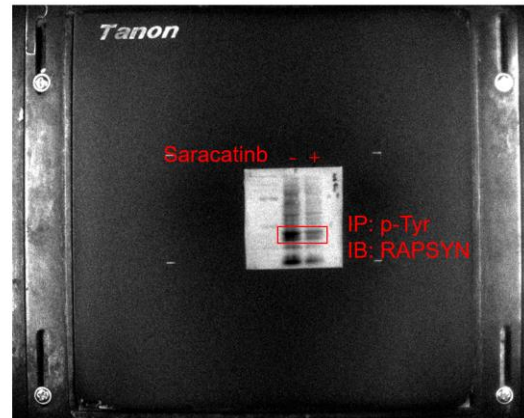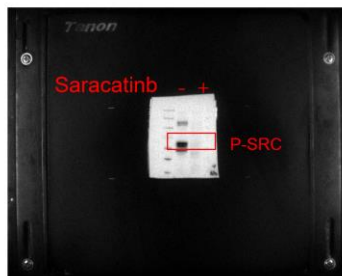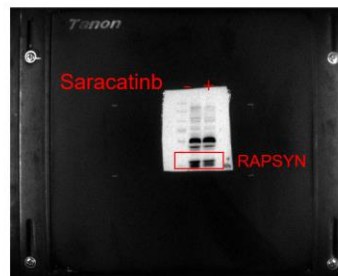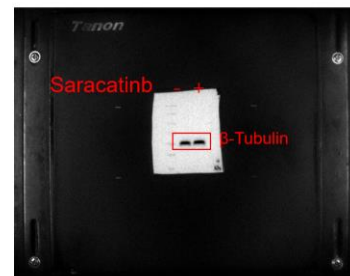

Supplement: fig4-figsupp1-data2 [file elife-88375-fig4-figsupp1-data2-v1.zip]

E

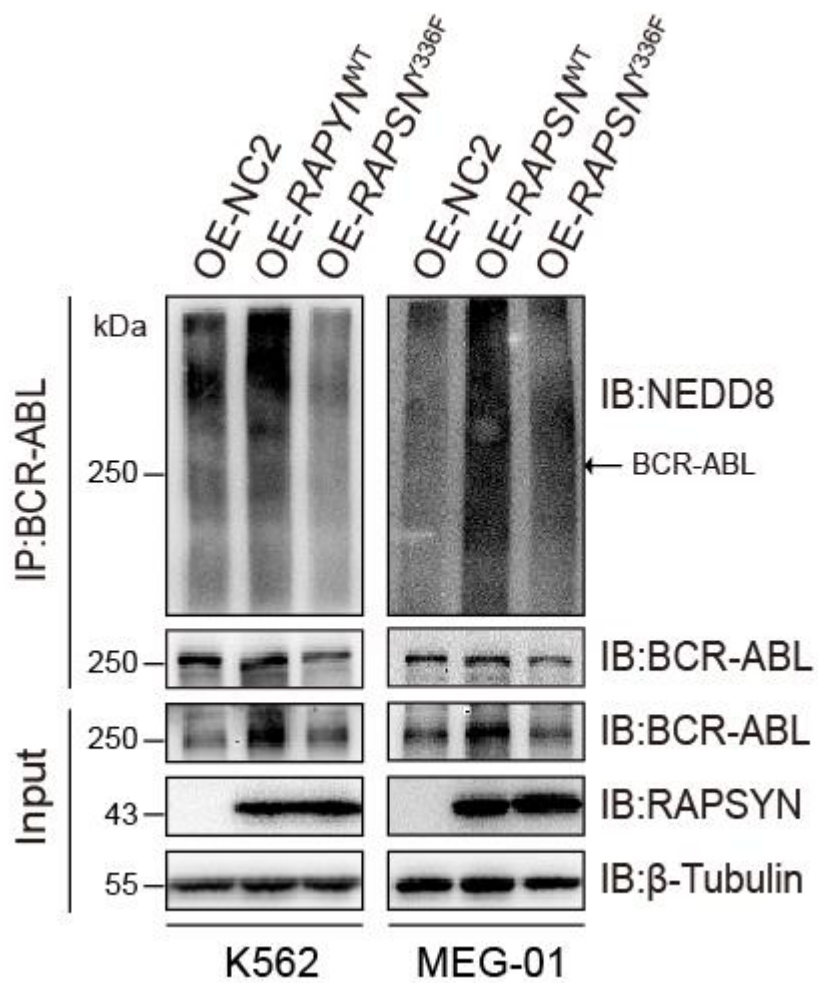

K562

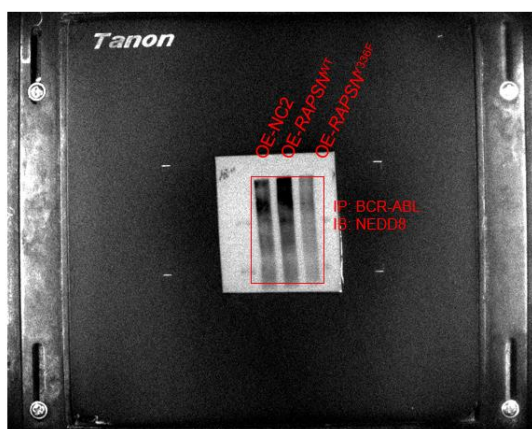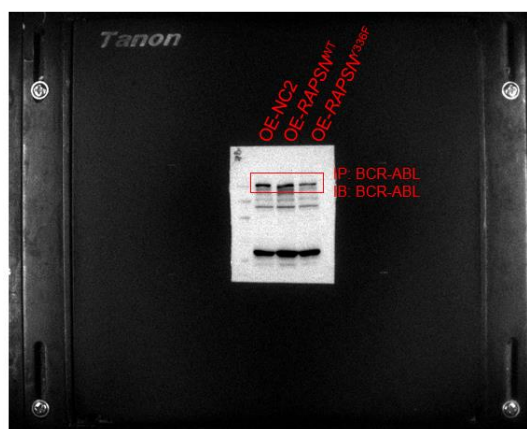

Input

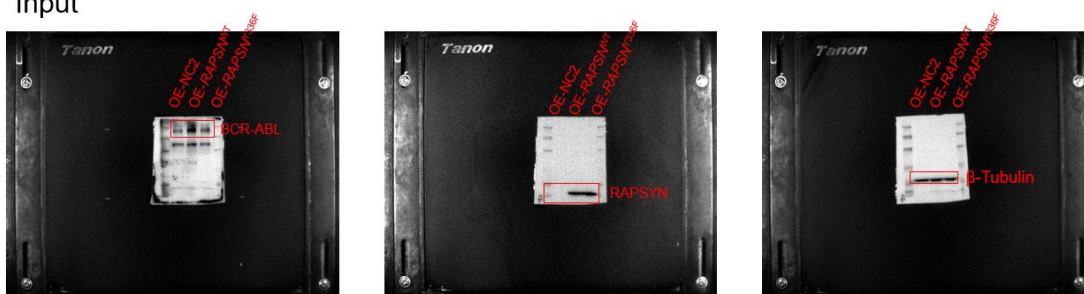

MEG-01

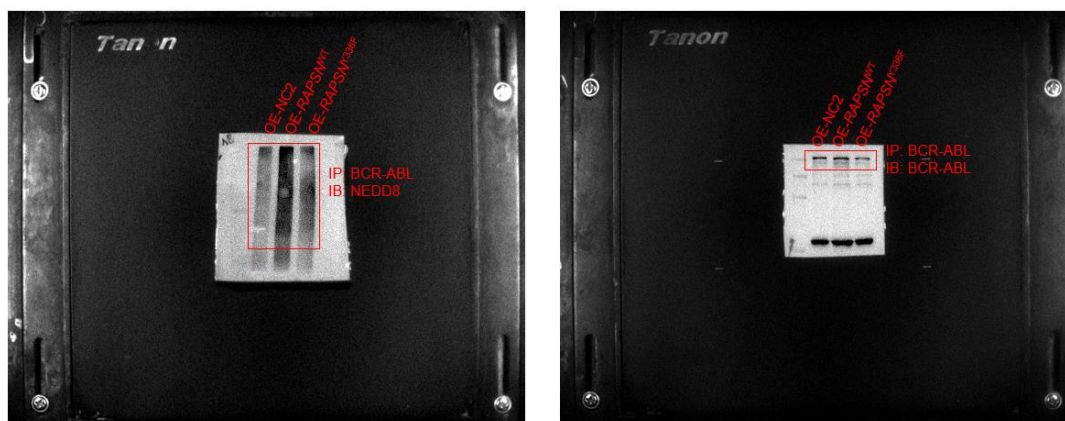

Input

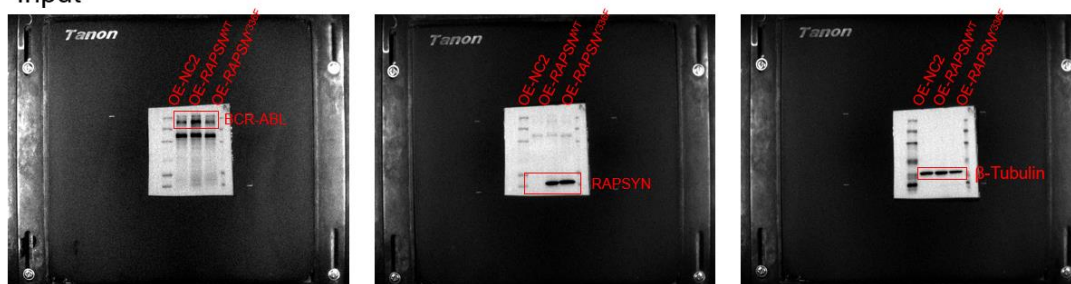

Supplement: fig5-data10 [file elife-88375-fig5-data10-v1.zip]

F

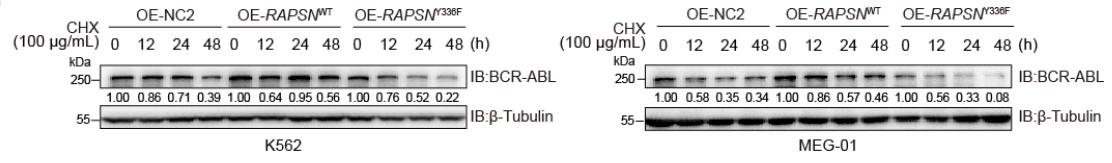

K562

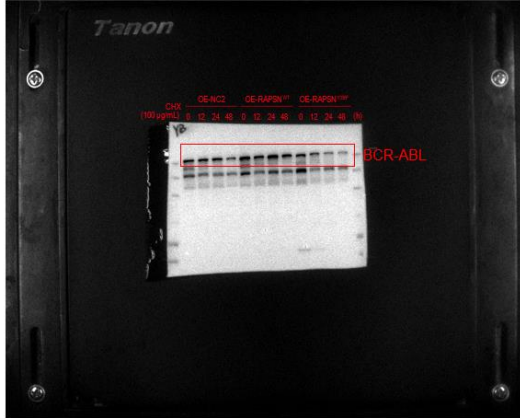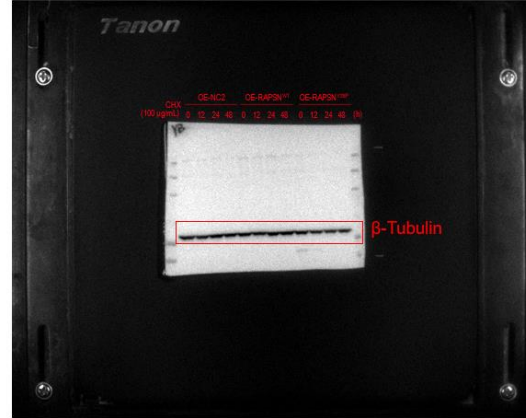

MEG-01

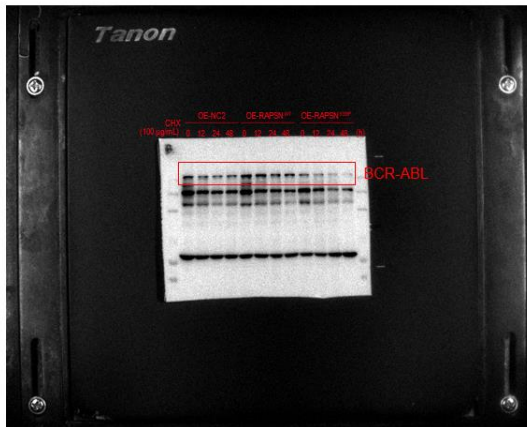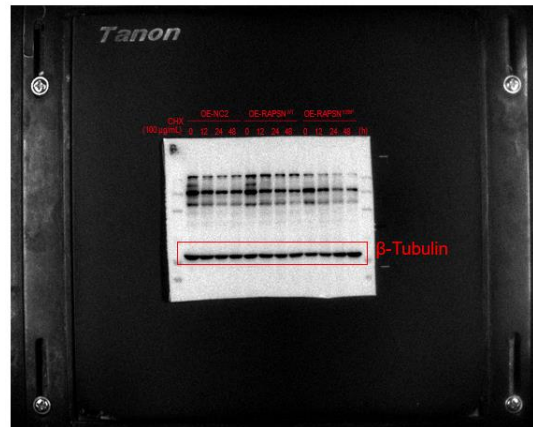

Supplement: fig5-data12 [file elife-88375-fig5-data12-v1.zip]

A

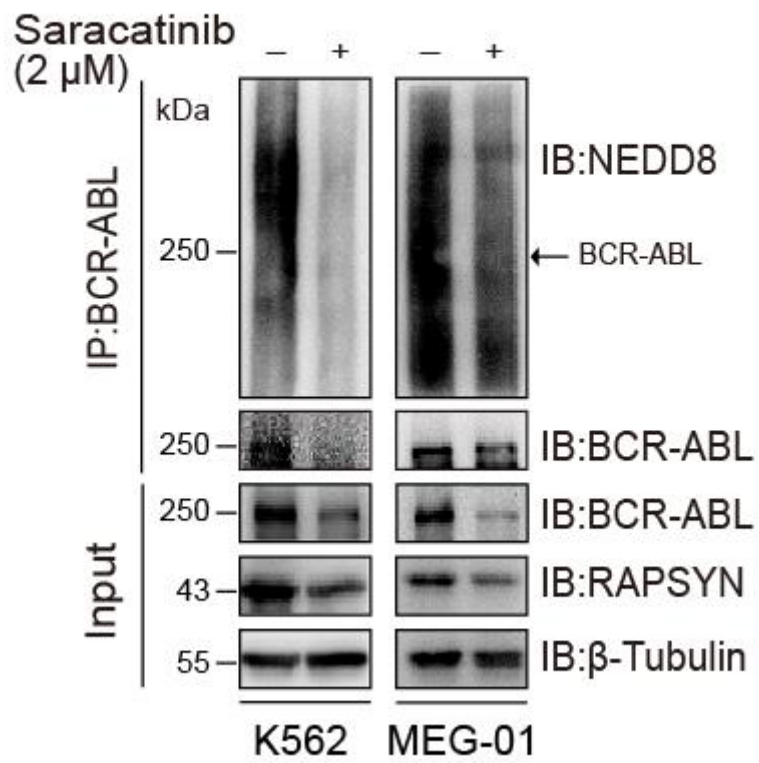

K562

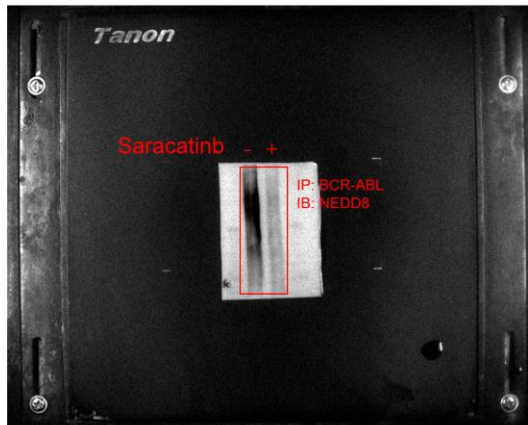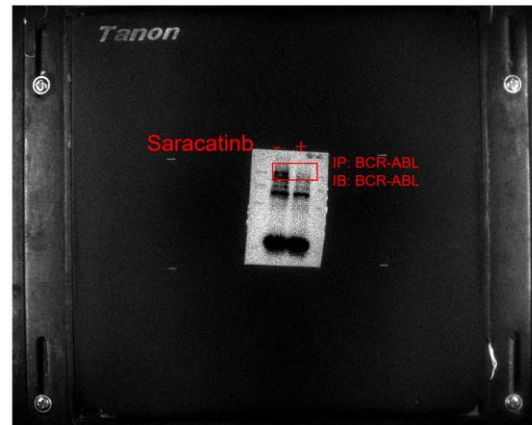

Input

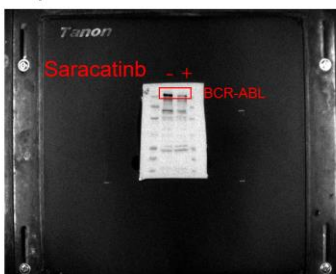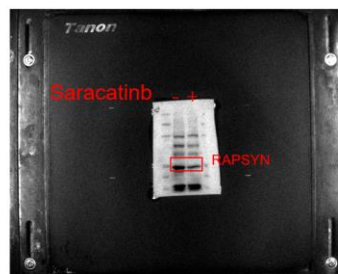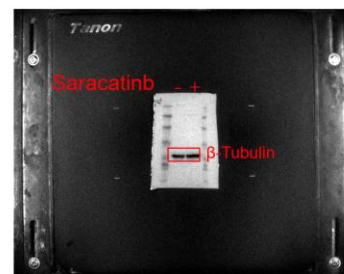

MEG-01

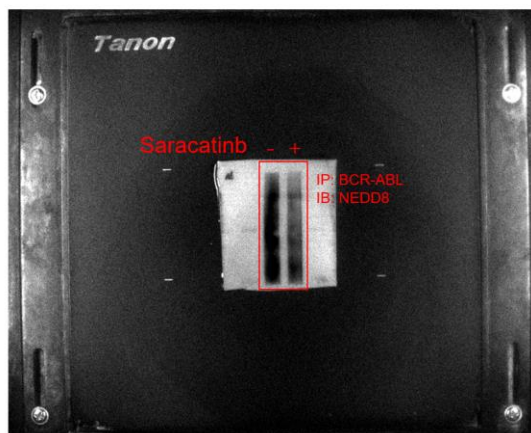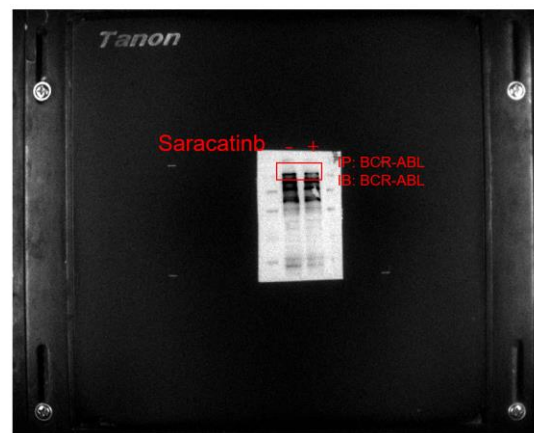

Input

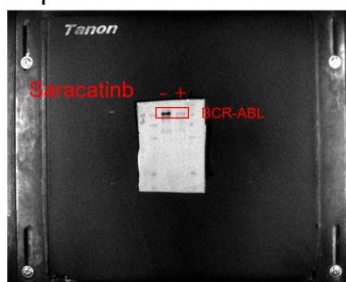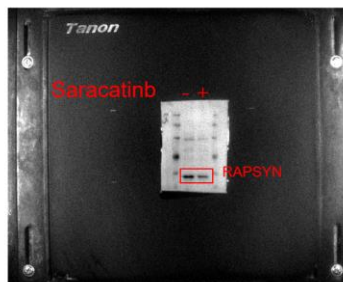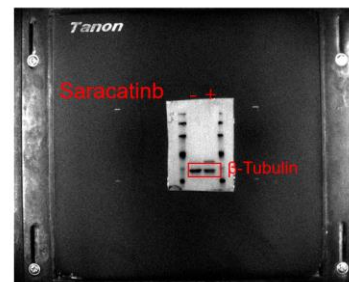

Supplement: fig5-data2 [file elife-88375-fig5-data2-v1.zip]

**B**

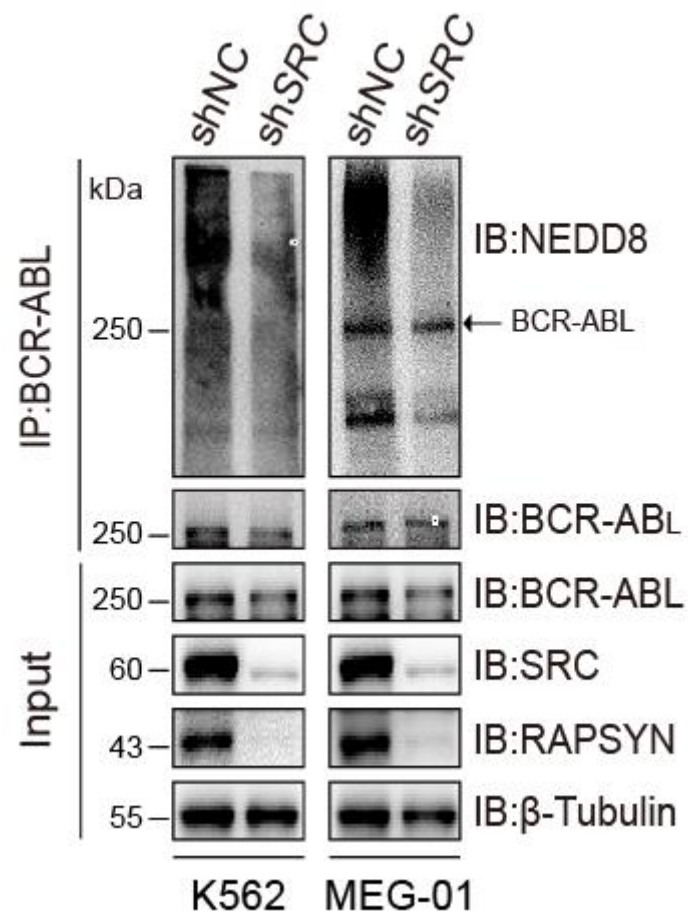

K562

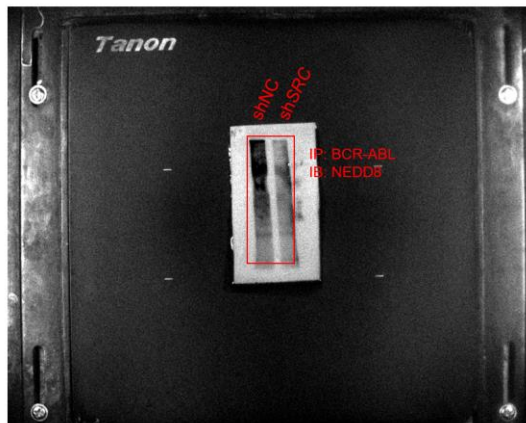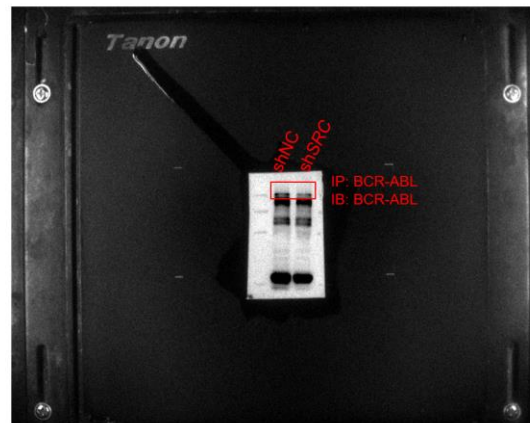

## Input

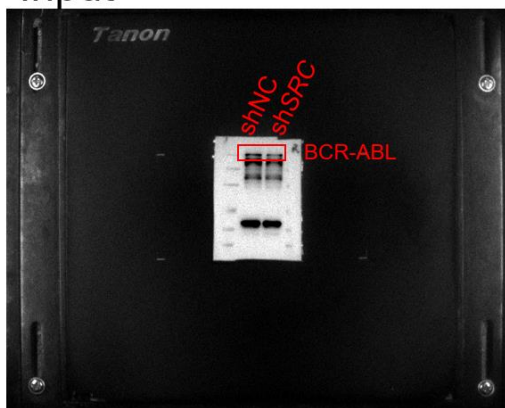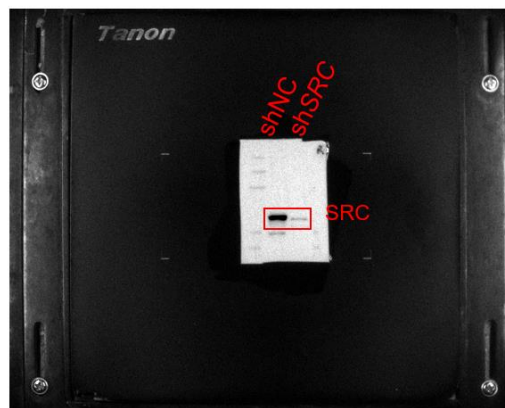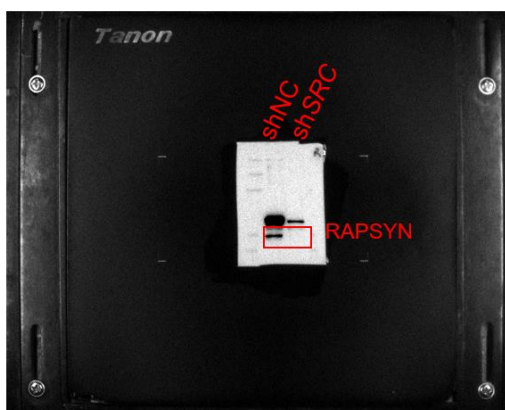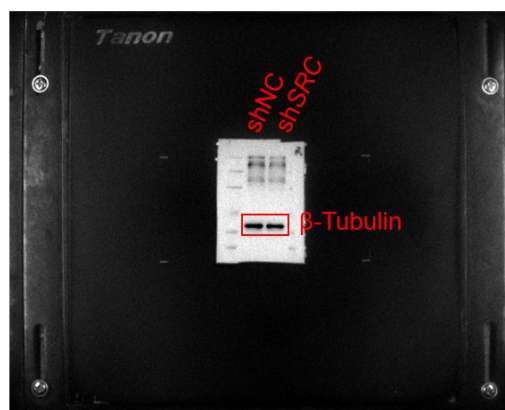

## MEG-01

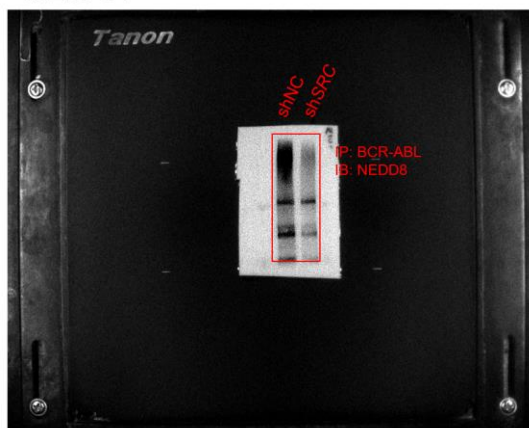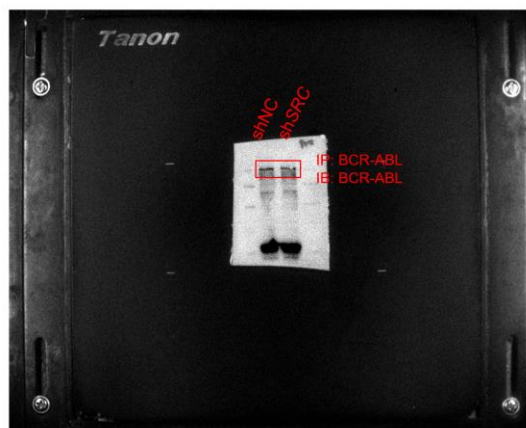

## Input

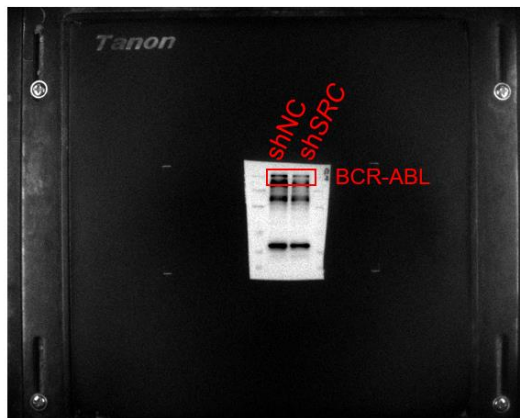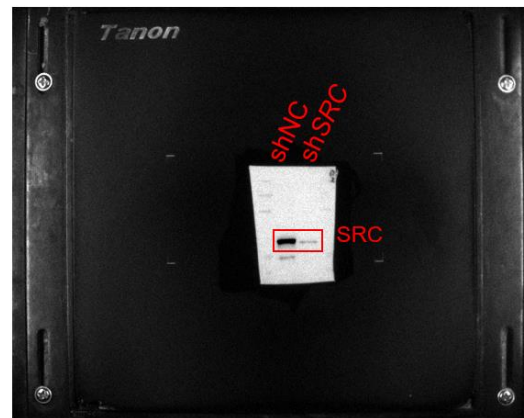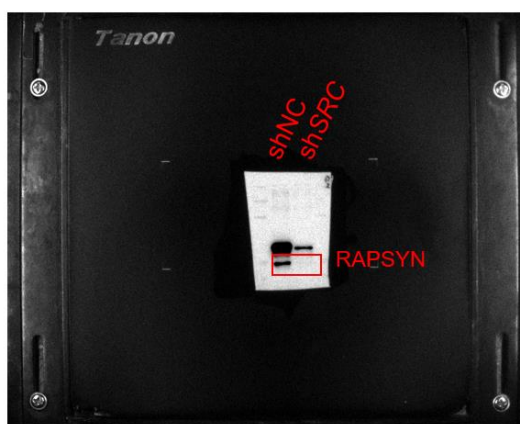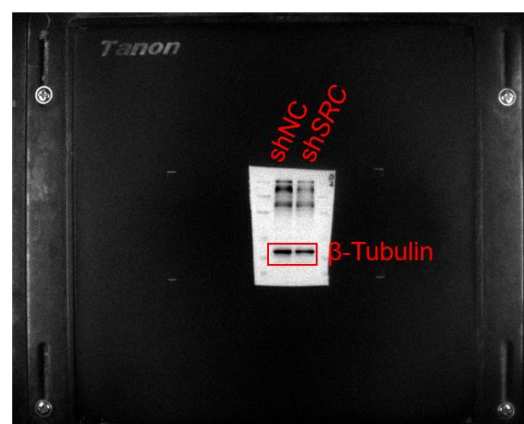

Supplement: fig5-data4 [file elife-88375-fig5-data4-v1.zip]

C

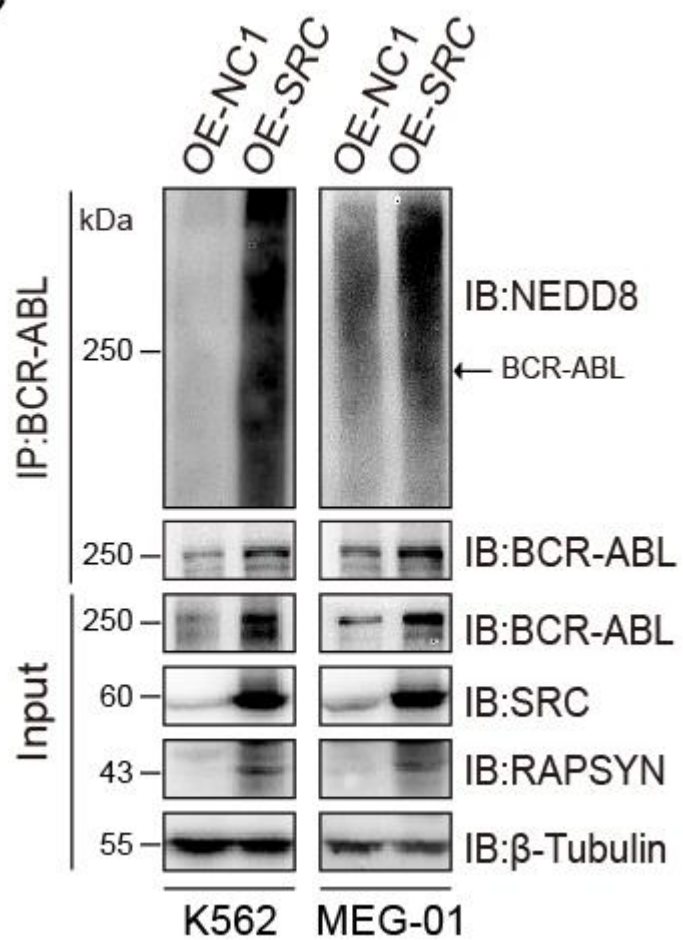

K562

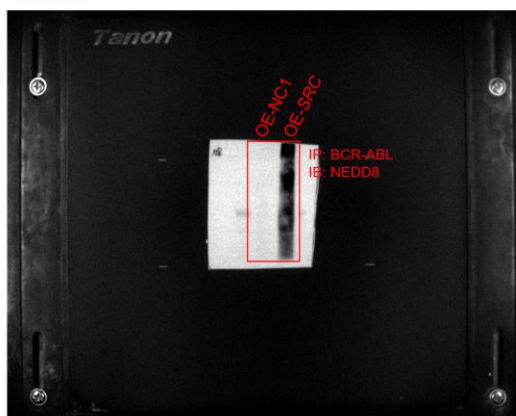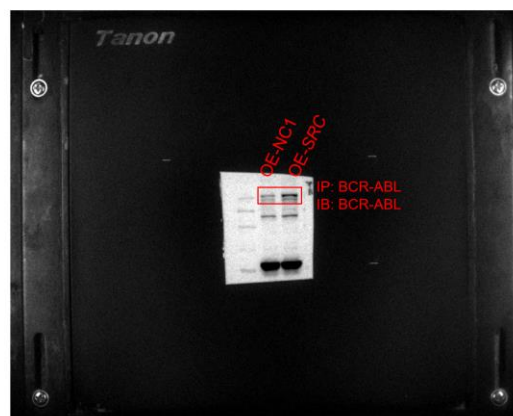

## Input

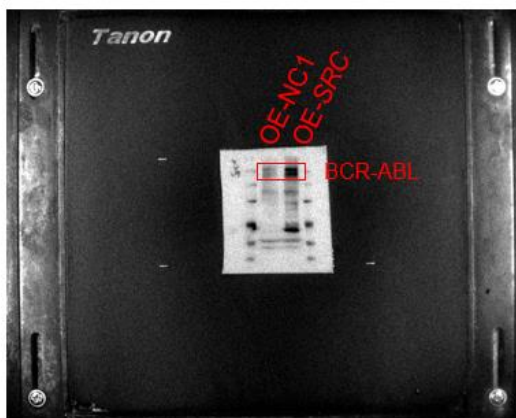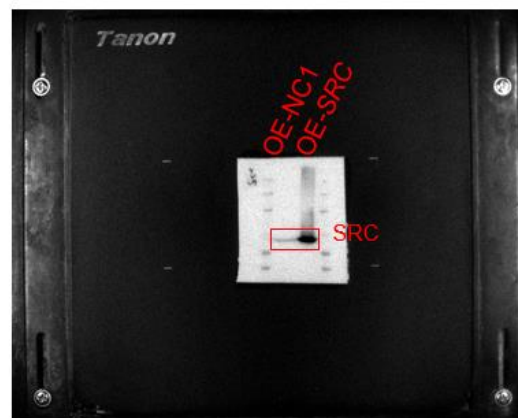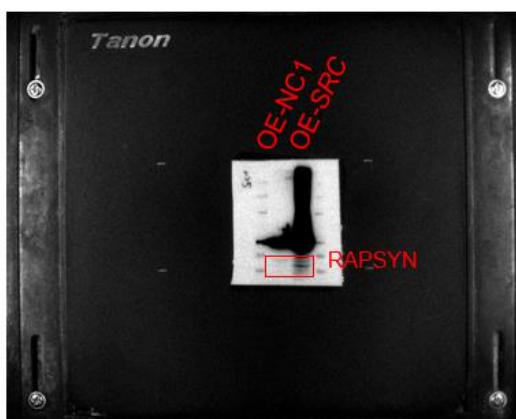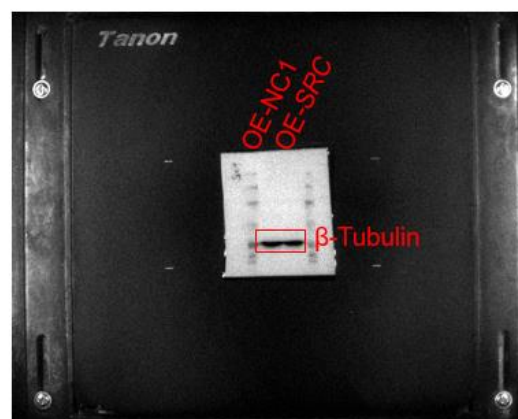

## MEG-01

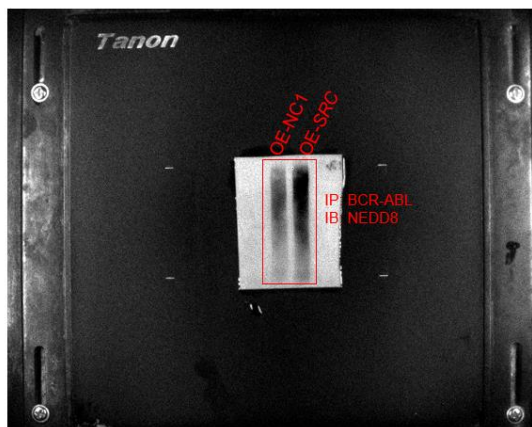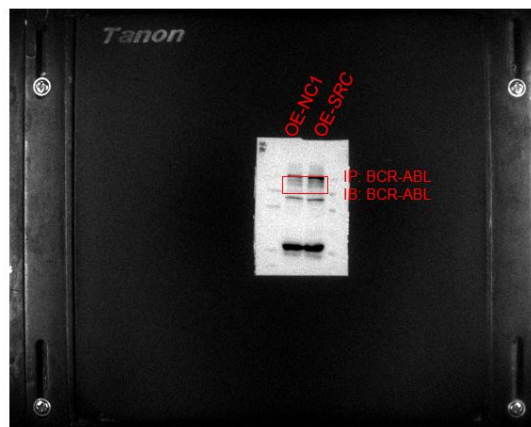

## Input

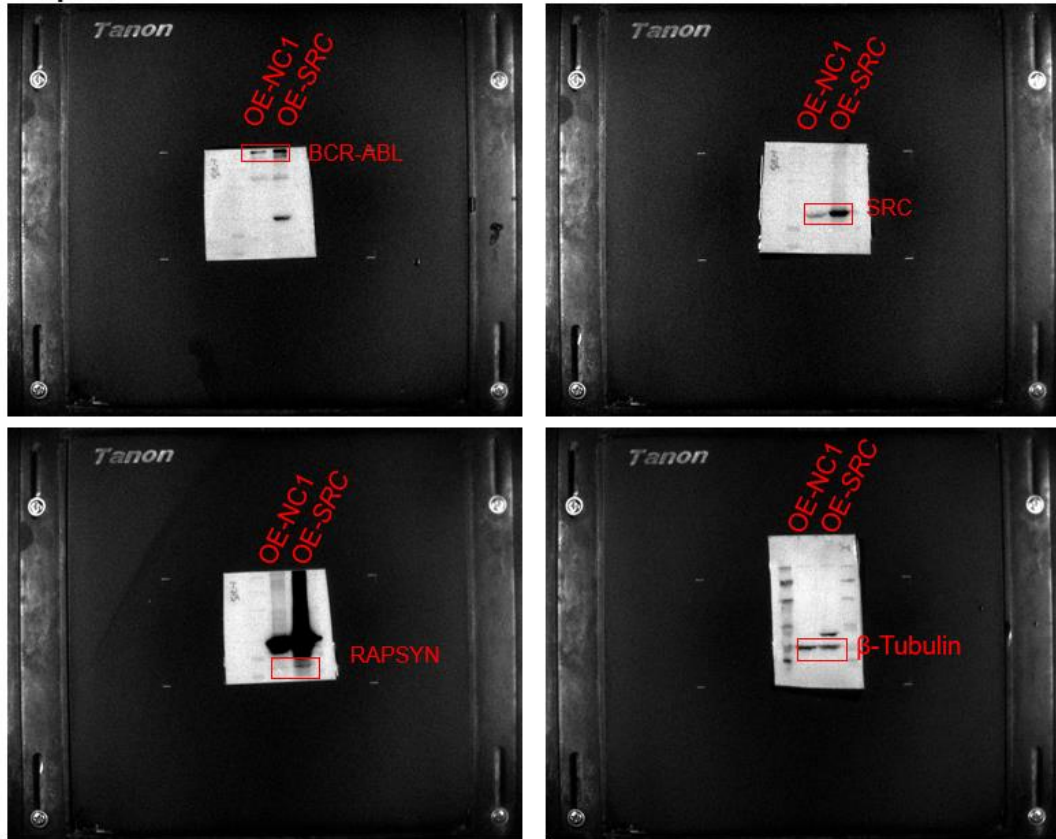

Supplement: fig5-data6 [file elife-88375-fig5-data6-v1.zip]

D

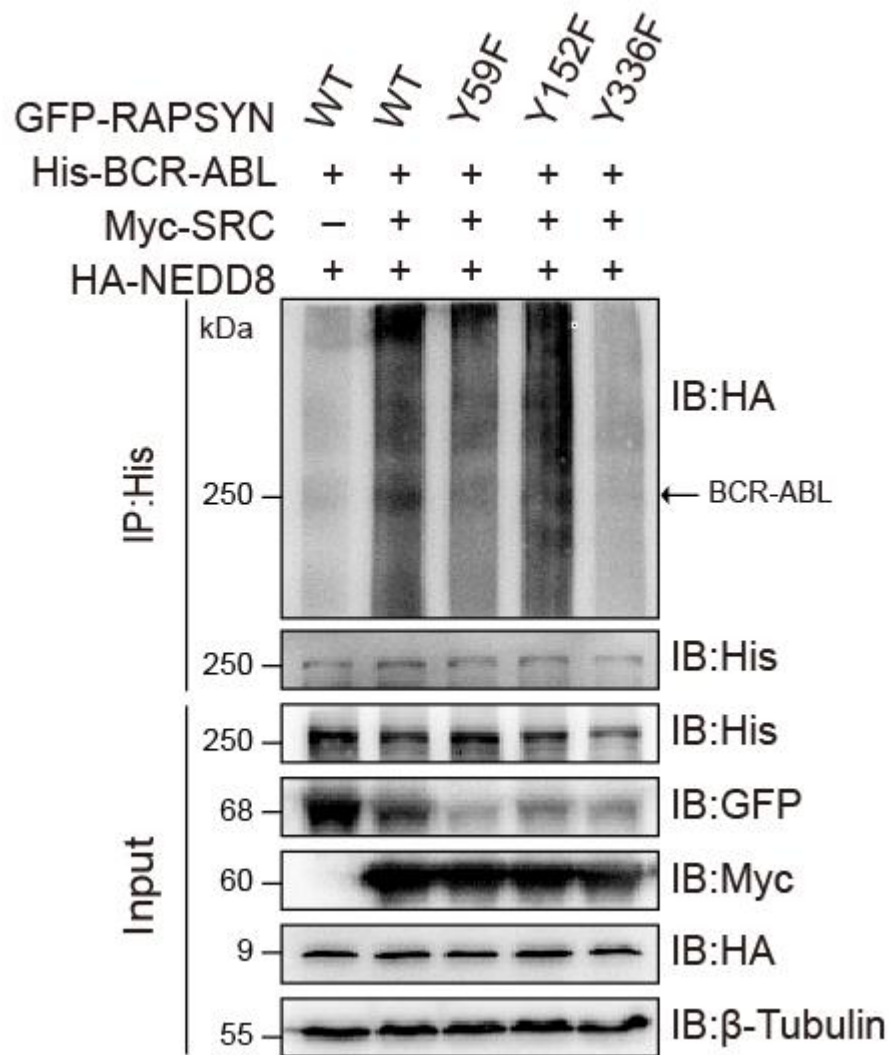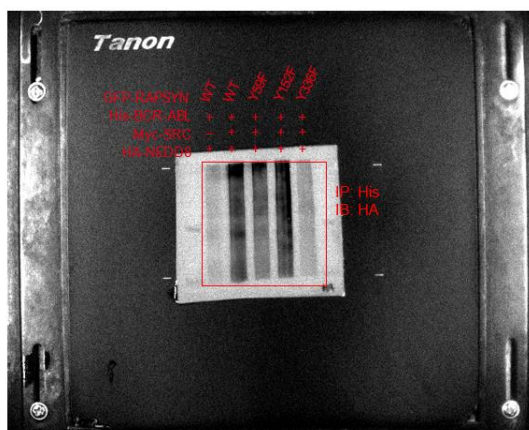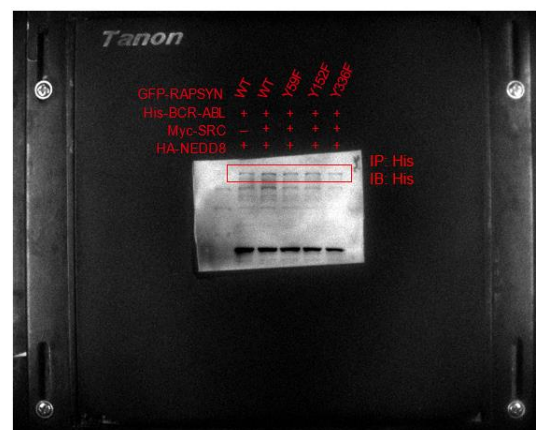

## Input

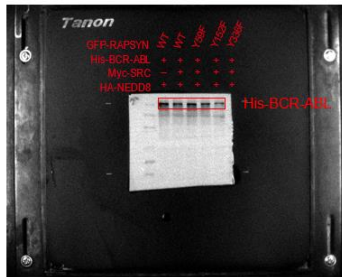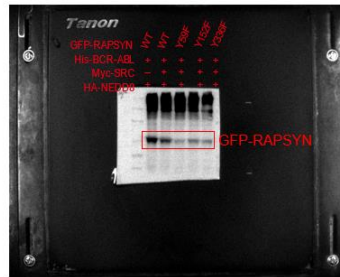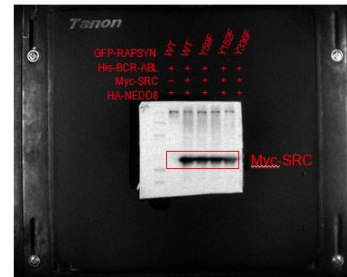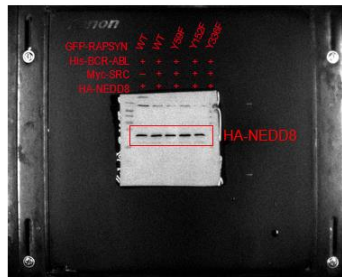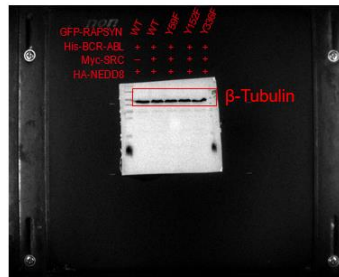

Supplement: fig5-data8 [file elife-88375-fig5-data8-v1.zip]
